# Supplementary material for: Dinitrogen extrusion from enoldiazo compounds under thermal conditions: synthesis of donor–acceptor cyclopropenes
Source: Royal Society of Chemistry journal article supplement (doi:10.1039/c5cc05006e), 2015-01-01

## **Dinitrogen Extrusion from Enoldiazo Compounds under Thermal Conditions: Synthesis of Donor-Acceptor Cyclopropenes**

Yongming Deng,<sup>[a]</sup> Changcheng Jing,<sup>[a]</sup> and Michael P. Doyle<sup>\*[a]</sup>

<sup>[a]</sup> *Department of Chemistry, The University of Texas at San Antonio, San Antonio, Texas 78249,  
United States*

### **Supporting Information**

**S2 General Information**

**S2-7 General Procedures for the Synthesis of Enoldiazoacetamides 1 and  
Enoldiazoacetates 3**

**S7 Screening of Reaction Conditions for Preparation of Donor-Acceptor  
Cyclopropenes**

**S8 Temperature Effect on Thermal Reaction of 3h**

**S9-14 General Procedures for the Preparation of Donor-Acceptor Cyclopropenes  
2 and 4**

**S14 -15 Procedures for the Asymmetric Cyclopropanation of Donor-Acceptor  
Cyclopropene 4a and Enoldiazoacetate 3a with Styrenes**

**S15-16 References**

**S17-50 NMR Spectra of 1, 2, 3, 5, 7 and 8**

**S50-51 HPLC Analyses of 7 and 8**

## General Information

All reactions were performed in oven-dried (140 °C) glassware. DCM (dichloromethane), DCE (1,2-dichloroethane) and toluene were distilled prior to use and kept over activated 3 Å molecular sieves;  $\text{CHCl}_3$  and  $\text{CDCl}_3$  were purchased from Sigma Aldrich and used without further treatment. Thin layer chromatography (TLC) was carried out using EM Science silica gel 60 F254 plates; visualization was accomplished with UV light (254 nm). Liquid chromatography was performed using flash chromatography of the indicated system on silica gel (230-400 mesh).  $^1\text{H}$  NMR spectra were recorded on an Inova<sup>TM</sup> (500 MHz) spectrometer, and chemical shifts were reported in ppm. The peak information was described as: br = broad, s = singlet, d = doublet, t = triplet, q = quartet, m = multiplet, comp = composite; coupling constant(s) in Hz.  $^{13}\text{C}$  NMR spectra were recorded on an Inova<sup>TM</sup> (125 MHz) spectrometer with complete proton decoupling. Enantioselectivity was determined on an Agilent 1200 Series HPLC using Daicel Chiralcel OD-H columns. High-resolution mass spectra (HRMS) were performed on a TOF-CS mass spectrometer using CsI as the standard.

## Materials

$\text{Rh}_2(\text{S-NTTL})_4^{[1a,1b]}$  and  $\text{Rh}_2(\text{S-TCPTTL})_4^{[1c,1d]}$  were prepared according to literature procedures. The diazoacetoacetamides **S-1** were prepared according to the literature procedures.<sup>[2]</sup> The diazoacetoacetates **S-3** were prepared according to the literature procedures.<sup>[3]</sup> All the other chemicals were obtained from commercial sources and used without further purification.

## General Procedures for the Synthesis of Enoldiazoacetamides **1** and Enoldiazoacetates **3**

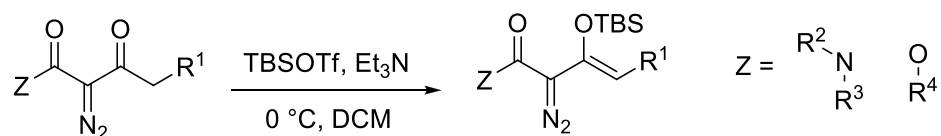

To a 100 mL oven-dried round bottom flask containing a magnetic stirring bar, **S-1** or **S-3** (2.0 mmol) and  $\text{Et}_3\text{N}$  (1.5 eq, 3.0 mmol, 0.45 mL) in DCM (10 mL) were added TBSOTf (1.1 eq, 2.2 mmol, 0.5 mL) slowly at 0 °C. After the reaction mixture was stirred for 0.5-1

h under these conditions, hexanes (30 mL) were added, followed by saturated aqueous NaHCO<sub>3</sub> (40 mL). The organic phase was separated and washed two more times with saturated aqueous NaHCO<sub>3</sub> (40 mL X 2) and dried with anhydrous Na<sub>2</sub>SO<sub>4</sub>. After evaporating the solvents, enoldiazo compounds **1** and **3** were purified by flash chromatography (SiO<sub>2</sub> was treated with hexanes with 2% Et<sub>3</sub>N for 30 min before use, hexanes 100%).

***N*-tert-Butyl-3-(tert-butyldimethylsilyloxy)-*N*-(4-chlorobenzyl)-2-diazobut-3-enamide**

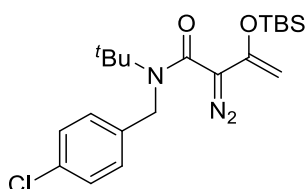

(**1a**). Red solid, 93% yield. <sup>1</sup>H NMR (500 MHz, CDCl<sub>3</sub>) δ 7.29 (d, *J* = 8.4 Hz, 2H), 7.16 (d, *J* = 8.4 Hz, 2H), 4.54 (s, 2H), 4.40 (d, *J* = 2.1 Hz, 1H), 4.16 (d, *J* = 2.1 Hz, 1H), 1.37 (s, 9H), 0.88 (s, 9H), 0.17 (s, 6H); <sup>13</sup>C NMR (125 MHz, CDCl<sub>3</sub>) δ 167.07, 143.83, 138.00, 133.01, 128.72, 128.06, 89.09, 58.29, 50.26,

28.81, 25.55, 18.05, -4.80. This compound has been previously reported; the spectroscopic data are identical to those in reference 2a.

***N*-tert-Butyl-3-(tert-butyldimethylsilyloxy)-*N*-(2-chlorobenzyl)-2-diazobut-3-enamide**

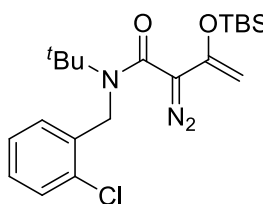

(**1b**). Red solid, 89% yield. <sup>1</sup>H NMR (500 MHz, CDCl<sub>3</sub>) δ 7.36 – 7.31 (comp, 2H), 7.27 – 7.20 (comp, 2H), 4.73 (s, 2H), 4.46 (d, *J* = 2.1 Hz, 1H), 4.19 (d, *J* = 2.1 Hz, 1H), 1.41 (s, 9H), 0.87 (s, 9H), 0.18 (s, 6H); <sup>13</sup>C NMR (125 MHz, CDCl<sub>3</sub>) δ 167.07, 143.97, 136.77, 132.03, 129.67, 128.32, 128.30, 126.68, 89.58, 58.57, 48.47, 28.68, 25.56, 18.05, -4.82. HRMS (ESI) calculated for C<sub>21</sub>H<sub>33</sub>ClN<sub>3</sub>O<sub>2</sub>Si [M+H]<sup>+</sup>: 422.2025; found: 422.2038.

***N*-tert-Butyl-3-(tert-butyldimethylsilyloxy)-2-diazo-*N*-(4-nitrobenzyl)but-3-enamide**

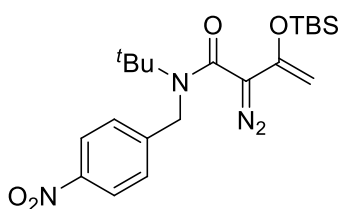

(**1c**). Red solid, 89% yield. <sup>1</sup>H NMR (500 MHz, CDCl<sub>3</sub>) δ 8.19 (d, *J* = 8.8 Hz, 2H), 7.41 (d, *J* = 8.8 Hz, 2H), 4.66 (s, 2H), 4.40 (d, *J* = 2.2 Hz, 1H), 4.16 (d, *J* = 2.2 Hz, 1H), 1.40 (s, 9H), 0.86 (s, 9H), 0.16 (s, 6H); <sup>13</sup>C NMR (125 MHz, CDCl<sub>3</sub>) δ 167.21, 147.25, 147.21, 143.55, 127.34, 123.86,

89.53, 58.54, 50.17, 28.83, 25.51, 18.03, -4.82. This compound has been previously reported; the spectroscopic data are identical to those in reference 2a.

***N*-*tert*-Butyl-3-(*tert*-butyldimethylsilyloxy)-2-diazo-*N*-(4-methoxybenzyl)but-3-**

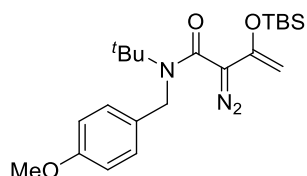

**enamide (1d).** Red solid, 93% yield.  $^1\text{H}$  NMR (500 MHz,  $\text{CDCl}_3$ )  $\delta$  7.14 (d,  $J = 7.3$  Hz, 2H), 6.86 (d,  $J = 7.3$  Hz, 2H), 4.52 (s, 2H), 4.41 (d,  $J = 1.9$  Hz, 1H), 4.15 (d,  $J = 1.9$  Hz, 1H), 3.79 (s, 3H), 1.37 (s, 9H), 0.89 (s, 9H), 0.18 (s, 6H);  $^{13}\text{C}$  NMR (125 MHz,  $\text{CDCl}_3$ )  $\delta$  166.95, 158.80, 144.06, 131.28, 127.98, 113.93, 88.78, 58.09, 55.19, 50.46, 28.79, 25.57, 18.05, -4.79. This compound has been previously reported; the spectroscopic data are identical to those in reference 2a.

**3-(*tert*-Butyldimethylsilyloxy)-2-diazo-*N,N*-dimethylbut-3-enamide (1e).** Red oil, 89%

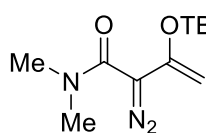

yield.  $^1\text{H}$  NMR (500 MHz,  $\text{CDCl}_3$ )  $\delta$  4.42 (d,  $J = 3.7$  Hz, 1H), 4.23 (d,  $J = 3.7$  Hz, 1H), 2.95 (s, 6H), 0.89 (s, 9H), 0.19 (s, 6H);  $^{13}\text{C}$  NMR (125 MHz,  $\text{CDCl}_3$ )  $\delta$  164.81, 143.76, 90.55, 37.39, 25.52, 18.02, -4.85. HRMS (ESI) calculated for  $\text{C}_{12}\text{H}_{23}\text{N}_3\text{O}_2\text{SiNa}$   $[\text{M}+\text{Na}]^+$ : 292.1457; found: 292.1469.

**3-(*tert*-Butyldimethylsilyloxy)-2-diazo-*N,N*-diisopropylbut-3-enamide (1f).** Red oil,

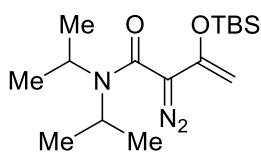

95% yield.  $^1\text{H}$  NMR (500 MHz,  $\text{CDCl}_3$ )  $\delta$  4.36 (d,  $J = 2.0$  Hz, 1H), 4.16 (d,  $J = 2.0$  Hz, 1H), 3.76 – 3.68 (comp, 2H), 1.30 (d,  $J = 6.7$  Hz, 12H), 0.91 (s, 9H), 0.21 (s, 6H);  $^{13}\text{C}$  NMR (125 MHz,  $\text{CDCl}_3$ )  $\delta$  162.43, 144.58, 89.65, 48.60, 25.58, 20.86, 18.09, -4.80. HRMS (ESI) calculated for  $\text{C}_{16}\text{H}_{31}\text{N}_3\text{O}_2\text{SiNa}$   $[\text{M}+\text{Na}]^+$ : 348.2083; found: 348.2072.

**3-(*tert*-Butyldimethylsilyloxy)-2-diazo-1-(piperidin-1-yl)but-3-en-1-one (1g).** Red oil,

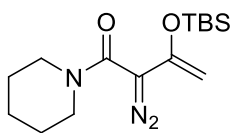

88% yield.  $^1\text{H}$  NMR (500 MHz,  $\text{CDCl}_3$ )  $\delta$  4.39 (d,  $J = 2.1$  Hz, 1H), 4.20 (d,  $J = 2.1$  Hz, 1H), 3.42 – 3.40 (comp, 4H), 1.65 – 1.61 (comp, 2H), 1.58 – 1.53 (comp, 4H), 0.90 (s, 9H), 0.20 (s, 6H);  $^{13}\text{C}$  NMR

(125 MHz, CDCl<sub>3</sub>)  $\delta$  164.00, 144.11, 90.01, 46.45, 25.77, 25.56, 24.51, 18.07, -4.80. HRMS (ESI) calculated for C<sub>15</sub>H<sub>27</sub>N<sub>3</sub>O<sub>2</sub>SiNa [M+Na]<sup>+</sup>: 332.1770; found: 332.1798.

***N*-Benzyl-3-(*tert*-butyldimethylsilyloxy)-2-diazo-*N*-methylbut-3-enamide (1h).** Red

oil, 87% yield. <sup>1</sup>H NMR (500 MHz, CDCl<sub>3</sub>)  $\delta$  7.39 – 7.31 (comp, 6H), 7.23 – 7.21 (comp, 4H), 6.81 (s, 1H), 4.52 (d, *J* = 2.1 Hz, 1H), 4.28 (d, *J* = 2.1 Hz, 1H), 2.80 (s, 3H), 0.93 (s, 9H), 0.24 (s, 6H); <sup>13</sup>C NMR (125 MHz, CDCl<sub>3</sub>)  $\delta$  165.36, 143.68, 138.48, 128.72, 128.50, 127.58, 91.17, 63.09, 33.13, 25.62, 18.12, -4.71. HRMS (ESI) calculated for C<sub>24</sub>H<sub>31</sub>N<sub>3</sub>O<sub>2</sub>SiNa [M+Na]<sup>+</sup>: 444.2083; found: 444.2071.

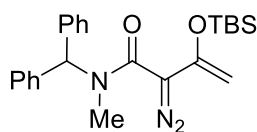

**(*Z*)-Methyl 3-(*tert*-Butyldimethylsilyloxy)-2-diazopent-3-enoate (3a).** Red oil, 95%

yield. <sup>1</sup>H NMR (500 MHz, CDCl<sub>3</sub>)  $\delta$  5.27 (q, *J* = 7.0 Hz, 1H), 3.79 (s, 3H), 1.69 (d, *J* = 7.0 Hz, 3H), 0.97 (s, 9H), 0.16 (s, 6H). This compound has been previously reported; the spectroscopic data are identical to those in reference 3h.

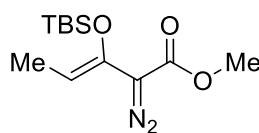

**(*Z*)-Benzyl 3-(*tert*-Butyldimethylsilyloxy)-2-diazopent-3-enoate (3b).** Red oil, 93%

yield. <sup>1</sup>H NMR (500 MHz, CDCl<sub>3</sub>)  $\delta$  7.38 – 7.32 (comp, 5H), 5.29 (q, *J* = 7.0 Hz, 1H), 5.24 (s, 2H), 1.69 (d, *J* = 7.0 Hz, 3H), 0.97 (s, 9H), 0.15 (s, 6H); <sup>13</sup>C NMR (125 MHz, CDCl<sub>3</sub>)  $\delta$  164.77, 135.94, 132.85, 128.50, 128.16, 128.10, 127.98, 108.20, 77.25, 77.00, 76.75, 66.29, 25.62, 18.17, 11.80, -4.66. HRMS (ESI) calculated for C<sub>18</sub>H<sub>26</sub>N<sub>2</sub>O<sub>3</sub>SiNa [M+Na]<sup>+</sup>: 369.1610; found: 369.1619.

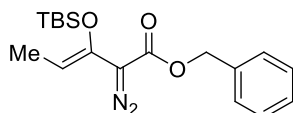

**(*Z*)-4-Methoxybenzyl 3-(*tert*-Butyldimethylsilyloxy)-2-diazopent-3-enoate (3c).** Red

oil, 90% yield. <sup>1</sup>H NMR (500 MHz, CDCl<sub>3</sub>)  $\delta$  7.30 (d, *J* = 8.7 Hz, 2H), 6.89 (d, *J* = 8.7 Hz, 2H), 5.27 (q, *J* = 7.0 Hz, 1H), 5.17 (s, 2H), 3.81 (s, 3H), 1.67 (d, *J* = 7.0 Hz,

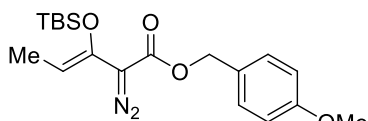

3H), 0.95 (s, 9H), 0.14 (s, 6H);  $^{13}\text{C}$  NMR (125 MHz,  $\text{CDCl}_3$ )  $\delta$  164.93, 159.62, 132.95, 129.98, 128.12, 113.90, 108.14, 66.21, 55.28, 25.66, 18.21, 11.84, -4.62. HRMS (ESI) calculated for  $\text{C}_{19}\text{H}_{28}\text{N}_2\text{O}_3\text{SiNa}$   $[\text{M}+\text{Na}]^+$ : 399.1716; found: 399.1708.

**(Z)-2-Methoxybenzyl 3-(tert-Butyldimethylsilyloxy)-2-diazopent-3-enoate (3d).** Red

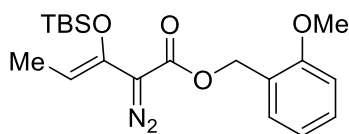

oil, 89% yield.  $^1\text{H}$  NMR (500 MHz,  $\text{CDCl}_3$ )  $\delta$  7.32 – 7.28 (comp, 2H), 6.97 – 6.93 (comp, 1H), 6.89 (d,  $J$  = 8.5 Hz, 1H), 5.29(s, 1H), 5.30 (q,  $J$  = 7.0 Hz, 1H), 3.84 (s, 3H), 1.68 (d,  $J$  = 7.0 Hz, 3H), 0.96 (s, 9H), 0.15 (s, 6H);  $^{13}\text{C}$  NMR (125 MHz,  $\text{CDCl}_3$ )  $\delta$  164.88, 157.35, 132.94, 129.37, 129.11, 124.33, 120.36, 110.36, 107.99, 61.92, 55.32, 25.65, 18.19, 11.83, -4.66. HRMS (ESI) calculated for  $\text{C}_{19}\text{H}_{28}\text{N}_2\text{O}_3\text{SiNa}$   $[\text{M}+\text{Na}]^+$ : 399.1716; found: 399.1719.

**(Z)-Benzhydryl 3-(tert-Butyldimethylsilyloxy)-2-diazopent-3-enoate (3e).** Red oil, 85%

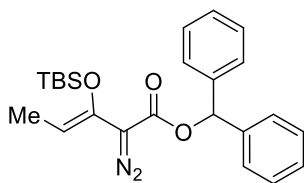

yield.  $^1\text{H}$  NMR (500 MHz,  $\text{CDCl}_3$ )  $\delta$  7.38 – 7.26 (comp, 10H), 6.98 (s, 1H), 5.28 (q,  $J$  = 7.0 Hz, 1H), 1.68 (d,  $J$  = 7.0 Hz, 3H), 0.96 (s, 9H), 0.12 (s, 6H);  $^{13}\text{C}$  NMR (125 MHz,  $\text{CDCl}_3$ )  $\delta$  164.01, 140.13, 132.74, 128.50, 127.90, 126.94, 108.53, 77.13, 25.64, 18.19, 11.82, -4.66. HRMS (ESI) calculated for  $\text{C}_{24}\text{H}_{30}\text{N}_2\text{O}_3\text{SiNa}$   $[\text{M}+\text{Na}]^+$ : 445.1923; found: 445.1941.

**(Z)-2,6-Dichlorobenzyl 3-(tert-Butyldimethylsilyloxy)-2-diazopent-3-enoate (3f).** Red

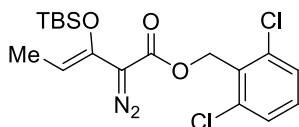

oil, 88% yield.  $^1\text{H}$  NMR (500 MHz,  $\text{CDCl}_3$ )  $\delta$  7.33 (d,  $J$  = 8.0 Hz, 2H), 7.22 (t,  $J$  = 8.0 Hz, 1H), 5.49 (s, 2H), 5.27 (q,  $J$  = 7.0 Hz, 1H), 1.66 (d,  $J$  = 7.0 Hz, 3H), 0.94 (s, 9H), 0.14 (s, 6H);  $^{13}\text{C}$  NMR (125 MHz,  $\text{CDCl}_3$ )  $\delta$  164.44, 136.92, 132.72, 131.27, 130.45, 128.40, 108.24, 61.39, 25.62, 18.16, 11.81, -4.70. HRMS (ESI) calculated for  $\text{C}_{18}\text{H}_{24}\text{O}_3\text{N}_2\text{SiNaCl}_2$   $[\text{M}+\text{Na}]^+$ : 437.0831; found: 437.0803.

**(Z)-Methyl 3-(tert-Butyldimethylsilyloxy)-2-diazo-4-phenylbut-3-enoate (3g).** Red oil, 91% yield.  $^1\text{H}$  NMR (500 MHz,  $\text{CDCl}_3$ )  $\delta$  7.51 (d,  $J$  = 7.5 Hz, 2H), 7.28 (t,  $J$  = 7.5 Hz,

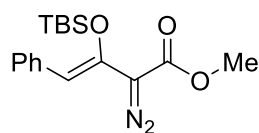

2H), 7.16 (t,  $J = 7.5$  Hz, 1H), 6.40 (s, 1H), 3.86 (s, 3H), 0.97 (s, 9H), -0.07 (s, 6H). This compound has been previously reported; the spectroscopic data are identical to those in reference 3e.

**(Z)-Benzyl 3-(tert-Butyldimethylsilyloxy)-2-diazo-4-phenylbut-3-enoate (3h).** Red oil,

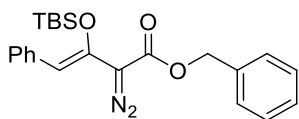

90% yield.  $^1\text{H}$  NMR (500 MHz,  $\text{CDCl}_3$ )  $\delta$  7.51 (comp, 2H), 7.45 – 7.34 (comp, 5H), 7.32 – 7.24 (comp, 2H), 7.17 (m, 1H), 6.42 (s, 1H), 5.31 (s, 2H), 0.97 (s, 9H), -0.05 (s, 6H);  $^{13}\text{C}$

NMR (125 MHz,  $\text{CDCl}_3$ )  $\delta$  164.29, 136.29, 135.82, 133.76, 129.02, 128.63, 128.33, 128.04, 127.90, 126.15, 111.42, 66.55, 25.75, 18.13, -4.80. HRMS (ESI) calculated for  $\text{C}_{23}\text{H}_{28}\text{O}_3\text{N}_2\text{SiNa}$   $[\text{M}+\text{Na}]^+$ : 431.1767; found: 431.1778.

### Screening of Reaction Conditions for Preparation of Donor-Acceptor Cyclopropenes<sup>a</sup>

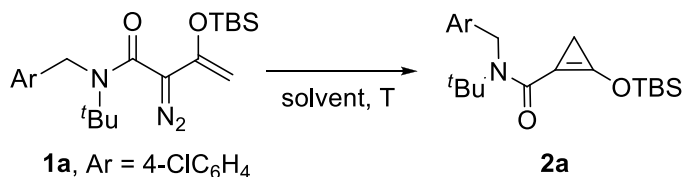

| Entry | Solvent                | T (°C)    | Time (h) | Yield, % <sup>b</sup> |
|-------|------------------------|-----------|----------|-----------------------|
| 1     | DCM                    | 40        | 4        | 83                    |
| 2     | $\text{CHCl}_3$        | 50        | 3        | quantitative          |
| 3     | $\text{CHCl}_3$        | refluxing | 2        | quantitative          |
| 4     | DCE                    | 50        | 3        | 87                    |
| 5     | Toluene                | 50        | 3        | 85                    |
| 6     | Hexane                 | 50        | 4        | 75                    |
| 7     | $\text{CH}_3\text{CN}$ | 50        | 6        | 89                    |
| 8     | EtOAc                  | 50        | 5        | 70                    |

<sup>a</sup> Reactions were performed on a 0.4 mmol scale: 0.4 mmol **1a** in 4 mL solvent at indicated temperature. <sup>b</sup> The yield of cyclopropene was determined by  $^1\text{H}$  NMR analysis using an internal standard (1,3,5-trimethoxybenzene).

### Temperature Effect on Thermal Reactions of **3h**

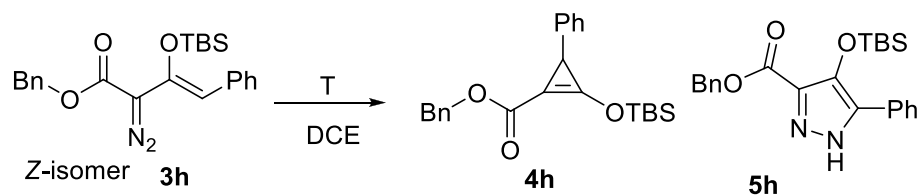

|            |        | <b>4h : 5h</b> |
|------------|--------|----------------|
| 40 °C, DCE | 9 h    | <b>39 : 61</b> |
| 60 °C, DCE | 1.5 h  | <b>48 : 52</b> |
| 80 °C, DCE | 25 min | <b>58 : 42</b> |

**3h** (0.4 mmol) at room temperature was added to a 10-mL oven-dried vial containing a magnetic stirring bar and 4 mL 1,2-dichloroethene (DCE), and then the vial was screwed close. The sealed reaction mixture was heated in oil bath at indicated temperature, during which time the diazo compound was converted to the corresponding cyclopropene. The color of the solution changed from orange to light yellow. After removing DCE under reduced pressure, the resulting reaction mixture was analyzed by  $^1\text{H}$  NMR to determine the ratio of **4h** and **5h** by using an internal standard (1,3,5-trimethoxybenzene).

### General Procedure for the Preparation of Donor-Acceptor Cyclopropenes **2** and **4**

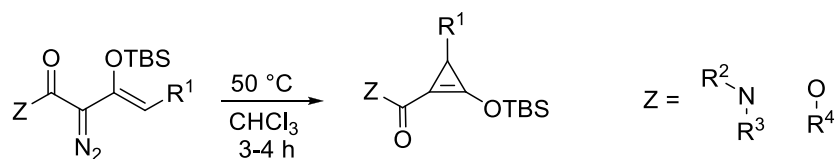

Enoldiazo compound (0.4 mmol) at room temperature was added to a 10-mL oven-dried vial containing a magnetic stirring bar and 4 mL  $\text{CHCl}_3$ , and then the vial was screwed close. The sealed reaction mixture was heated in oil bath at 50 °C for 3 to 4 hours, during which time the diazo compound was converted to the corresponding cyclopropene. The color of the solution changed from orange to colorless or light yellow. After removing  $\text{CHCl}_3$  under reduced pressure, the resulting cyclopropenes were characterized directly without further purification.



***N*-tert-Butyl-2-(tert-butyldimethylsilyloxy)-*N*-(4-chlorobenzyl)cycloprop-1-enecarboxamide (2a).** Colorless oil, quantitative. <sup>1</sup>H

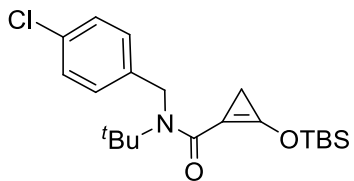

NMR (500 MHz, CDCl<sub>3</sub>) δ 7.24 (d, *J* = 8.4 Hz, 2H), 7.12 (d, *J* = 8.4 Hz, 2H), 4.73 (s, 2H), 1.79 (s, 2H), 1.42 (s, 9H), 0.72 (s, 9H), 0.12 (s, 6H); <sup>13</sup>C NMR (125 MHz, CDCl<sub>3</sub>) δ 162.32, 139.12, 134.59, 132.23, 128.45, 127.28, 72.09, 57.70, 49.07, 28.68, 24.93, 17.94, 17.51, -4.60. HRMS (ESI) calculated for C<sub>21</sub>H<sub>33</sub>ClNO<sub>2</sub>SiNa [M+Na]<sup>+</sup>: 416.1789; found: 416.1767.

***N*-tert-Butyl-2-(tert-butyldimethylsilyloxy)-*N*-(2-chlorobenzyl)cycloprop-1-enecarboxamide (2b).** Colorless oil, quantitative. <sup>1</sup>H NMR

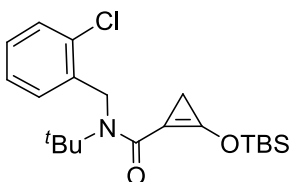

(500 MHz, CDCl<sub>3</sub>) δ 7.30 – 7.25 (comp, 2H), 7.21– 7.12 (comp, 2H), 4.79 (s, 2H), 1.74 (s, 2H), 1.45 (s, 9H), 0.71 (s, 9H), 0.09 (s, 6H); <sup>13</sup>C NMR (125 MHz, CDCl<sub>3</sub>) δ 162.54, 137.74, 134.83, 131.51, 129.12, 127.64, 127.44, 126.65, 71.84, 57.62, 47.64, 28.50, 25.03, 17.81, 17.52, -4.65. HRMS (ESI) calculated for C<sub>21</sub>H<sub>33</sub>ClNO<sub>2</sub>SiNa [M+Na]<sup>+</sup>: 416.1789; found: 416.1771.

***N*-tert-Butyl-2-(tert-butyldimethylsilyloxy)-*N*-(4-nitrobenzyl)cycloprop-1-enecarboxamide (2c).** Colorless oil, 92% yield. <sup>1</sup>H NMR

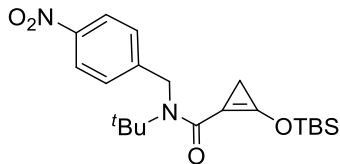

(500 MHz, CDCl<sub>3</sub>) δ 8.17 (d, *J* = 8.7 Hz, 2H), 7.39 (d, *J* = 8.7 Hz, 2H), 4.86 (s, 2H), 1.80 (s, 2H), 1.44 (s, 9H), 0.69 (s, 9H), 0.11 (s, 6H); <sup>13</sup>C NMR (125 MHz, CDCl<sub>3</sub>) δ 162.28, 148.59, 146.89, 135.06, 126.69, 123.72, 71.89, 57.86, 49.39, 28.73, 24.89, 17.88, 17.48, -4.59. HRMS (ESI) calculated for C<sub>21</sub>H<sub>33</sub>N<sub>2</sub>O<sub>4</sub>SiNa [M+Na]<sup>+</sup>: 427.2029; found: 427.2031.

***N*-tert-Butyl-2-(tert-butyldimethylsilyloxy)-*N*-(4-methoxybenzyl)cycloprop-1-enecarboxamide (2d).** Colorless oil, 85% yield. <sup>1</sup>H NMR

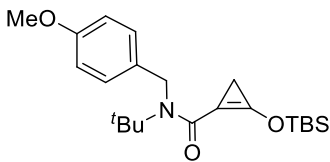

(500 MHz, CDCl<sub>3</sub>) δ 7.09 (d, *J* = 8.7 Hz, 2H), 6.80 (d, *J* = 8.7 Hz, 2H), 4.71 (s, 2H), 3.76 (s, 3H), 1.80 (s, 2H), 1.42 (s, 9H), 0.72 (s, 9H), 0.12 (s, 6H); <sup>13</sup>C NMR (125 MHz, CDCl<sub>3</sub>) δ 162.30, 158.33, 134.26,

132.41, 127.01, 113.73, 72.41, 57.59, 55.19, 49.01, 28.67, 25.00, 18.11, 17.55, -4.60. HRMS (ESI) calculated for  $C_{22}H_{35}NO_3SiNa$   $[M+Na]^+$ : 412.2284; found: 412.2291.

**2-(*tert*-Butyldimethylsilyloxy)-*N,N*-dimethylcycloprop-1-enecarboxamide (2e).** Light

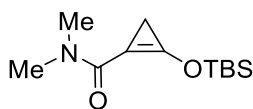

yellow oil, quantitative.  $^1H$  NMR (500 MHz,  $CDCl_3$ )  $\delta$  3.09 (s, 3H), 2.93 (s, 3H), 1.84 (s, 2H), 0.91 (s, 9H), 0.26 (s, 6H);  $^{13}C$  NMR (125 MHz,  $CDCl_3$ )  $\delta$  160.40, 135.82, 70.57, 37.16, 34.64,

25.24, 17.81, 17.77, -4.50. HRMS (ESI) calculated for  $C_{12}H_{23}NO_2SiNa$   $[M+Na]^+$ : 264.1396; found: 264.1377.

**2-(*tert*-Butyldimethylsilyloxy)-*N,N*-diisopropylcycloprop-1-enecarboxamide (2f).**

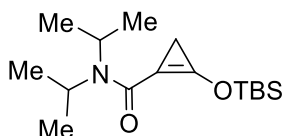

Light yellow oil, quantitative.  $^1H$  NMR (500 MHz,  $CDCl_3$ )  $\delta$  4.38 – 4.33 (comp, 1H), 3.58 – 3.42 (comp, 1H), 1.84 (s, 2H), 1.40 (d,  $J = 6.7$  Hz, 6H), 1.18 (d,  $J = 6.7$  Hz, 6H), 0.94 (s, 9H), 0.27 (s, 6H);  $^{13}C$  NMR (125 MHz,  $CDCl_3$ )  $\delta$  159.87, 133.62,

71.96, 48.92, 45.38, 25.22, 20.98, 20.59, 17.79, 17.78, -4.43. HRMS (ESI) calculated for  $C_{16}H_{31}NO_2SiNa$   $[M+Na]^+$ : 320.2022; found: 320.2040.

**(2-(*tert*-Butyldimethylsilyloxy)cycloprop-1-enyl)(piperidin-1-yl)methanone (2g).**Light

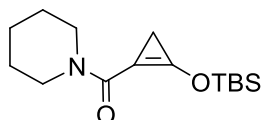

yellow oil, quantitative.  $^1H$  NMR (500 MHz,  $CDCl_3$ )  $\delta$  3.58 – 3.54 (comp, 4H), 1.86 (s, 2H), 1.63 – 1.51 (comp, 6H), 0.93 (s, 9H), 0.28 (s, 6H);  $^{13}C$  NMR (125 MHz,  $CDCl_3$ )  $\delta$  158.83,

135.00, 70.65, 46.72, 42.57, 26.57, 25.63, 25.24, 24.70, 17.83, 17.81, -4.49. HRMS (ESI) calculated for  $C_{15}H_{27}NO_2SiNa$   $[M+Na]^+$ : 304.1709; found: 304.1706.

***N*-Benzhydryl-2-(*tert*-Butyldimethylsilyloxy)-*N*-methylcycloprop-1-enecarboxamide**

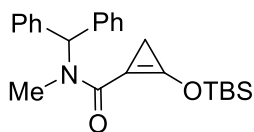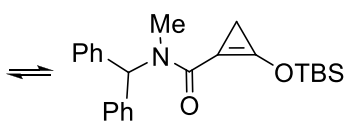

**(2h).** Light yellow oil, quantitative.

$^1H$  NMR (500 MHz,  $CDCl_3$ )  $\delta$  7.36 – 7.20 (comp, 22H), 6.74 (s, 1H), 2.96

(s, 3H), 2.81 (s, 3H), 1.95 (s, 2H), 1.92 (s, 2H), 0.96 (s, 9H), 0.86 (s, 9H), 0.32 (s, 6H), 0.25 (s, 6H);  $^{13}C$  NMR (125 MHz,  $CDCl_3$ )  $\delta$  161.16, 160.91, 139.36, 139.13, 136.87,

135.89, 128.85, 128.59, 128.38, 128.35, 127.47, 127.25, 70.71, 70.42, 64.49, 59.95, 25.30, 25.21, 17.91, 17.78, -4.34, -4.50. HRMS (ESI) calculated for  $C_{24}H_{31}NO_2SiNa$   $[M+Na]^+$ : 416.2022; found: 416.2029.

**Methyl 2-(*tert*-Butyldimethylsilyloxy)-3-methylcycloprop-1-enecarboxylate (4a).**

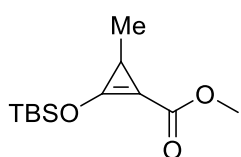

Light yellow oil, quantitative.  $^1H$  NMR (500 MHz,  $CDCl_3$ )  $\delta$  3.73 (s, 3H), 2.33 (q,  $J = 4.9$  Hz, 1H), 1.23 (d,  $J = 4.9$  Hz, 3H), 0.97 (s, 9H), 0.32 (s, 6H);  $^{13}C$  NMR (125 MHz,  $CDCl_3$ )  $\delta$  160.3, 148.6, 77.2, 51.3, 25.3, 24.4, 19.4, 18.0, -5.1, -5.2. HRMS (ESI) calculated for  $C_{12}H_{22}O_3SiNa$   $[M+Na]^+$ : 265.1236; found: 265.1237.

**Benzyl 2-(*tert*-Butyldimethylsilyloxy)-3-methylcycloprop-1-enecarboxylate (4b).**

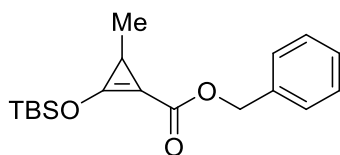

Light yellow oil, quantitative;  $^1H$  NMR (500 MHz,  $CDCl_3$ )  $\delta$  7.30 – 7.44 (comp, 5 H), 5.21 (s, 2H), 2.38 (q,  $J = 4.8$  Hz, 1H), 1.27 (d,  $J = 4.8$  Hz, 3H), 0.98 (s, 9H), 0.32 (s, 6H);  $^{13}C$  NMR (125 MHz,  $CDCl_3$ )  $\delta$  159.7, 148.8, 136.3, 128.4, 128.3, 128.0, 77.3, 65.9, 25.3, 24.4, 19.4, 18.0, -5.1, -5.2. HRMS (ESI) calculated for  $C_{18}H_{26}O_3SiNa$   $[M+Na]^+$ : 341.1549; found: 341.1550.

**4-Methoxybenzyl 2-(*tert*-Butyldimethylsilyloxy)-3-methylcycloprop-1-enecarboxylate (4c).**

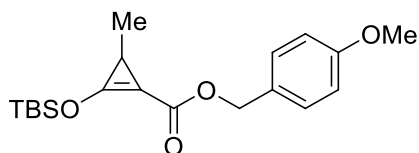

Light yellow oil, quantitative.  $^1H$  NMR (500 MHz,  $CDCl_3$ )  $\delta$  7.32 (d,  $J = 8.8$  Hz, 2H), 6.88 (d,  $J = 8.8$  Hz, 2H), 5.12 (s, 2H), 3.80 (s, 3H), 2.33 (q,  $J = 4.8$  Hz, 1H), 1.23 (d,  $J = 4.8$  Hz, 3H), 0.95 (s, 9H), 0.29 (s, 3H), 0.28 (s, 3H);  $^{13}C$  NMR (125 MHz,  $CDCl_3$ )  $\delta$  159.8, 159.5, 148.5, 130.1, 128.4, 113.8, 77.3, 65.8, 55.3, 25.3, 24.4, 19.4, 17.9, -5.1, -5.2. HRMS (ESI) calculated for  $C_{19}H_{28}O_3SiNa$   $[M+Na]^+$ : 371.1655; found: 371.1645.

**2-Methoxybenzyl 2-(*tert*-Butyldimethylsilyloxy)-3-methylcycloprop-1-enecarboxylate (4d).**

Light yellow oil, quantitative;  $^1H$  NMR (500 MHz,  $CDCl_3$ )  $\delta$  ppm 7.35 (d,  $J = 7.4$  Hz, 1H), 7.27 – 7.32 (comp, 1H), 6.95 (t,  $J = 7.4$  Hz, 1H), 6.88 (comp, 1H), 5.25 (s, 1H), 5.24

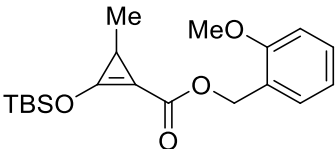
 (s, 1H), 3.83 (s, 3H), 2.35 (q,  $J = 4.8$  Hz, 1H), 1.25 (d,  $J = 4.8$  Hz, 3H), 0.95 (s, 9H), 0.28 (s, 3H), 0.28 (s, 3H);  $^{13}\text{C}$  NMR (125 MHz,  $\text{CDCl}_3$ )  $\delta$  159.8, 157.4, 148.2, 129.5, 129.3, 124.6, 120.3, 110.3, 77.4, 61.4, 55.3, 25.3, 24.3, 19.4, 17.9, -5.3, -5.3. HRMS (ESI) calculated for  $\text{C}_{19}\text{H}_{28}\text{O}_3\text{SiNa}$   $[\text{M}+\text{Na}]^+$ : 371.1655; found: 371.1648.

**Benzhydryl 2-(*tert*-Butyldimethylsilyloxy)-3-methylcycloprop-1-enecarboxylate (4e).**

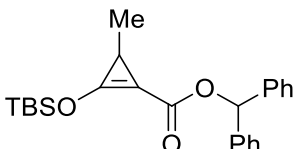
 Light yellow oil, quantitative.  $^1\text{H}$  NMR (500 MHz,  $\text{CDCl}_3$ )  $\delta$  7.32 – 7.39 (comp, 8H), 7.27 – 7.31 (comp, 2H), 6.96 (s, 1H), 2.39 (q,  $J = 4.8$  Hz, 1H), 1.29 (d,  $J = 4.8$  Hz, 3H), 0.96 (s, 9H), 0.30 (s, 3H), 0.30 (s, 3H);  $^{13}\text{C}$  NMR (125 MHz,  $\text{CDCl}_3$ )  $\delta$  158.9, 149.1, 140.5, 140.5, 128.4, 128.4, 127.8, 127.7, 127.4, 127.0, 77.3, 76.5, 25.3, 24.4, 19.4, 17.9, -5.1, -5.2. HRMS (ESI) calculated for  $\text{C}_{24}\text{H}_{30}\text{O}_3\text{SiNa}$   $[\text{M}+\text{Na}]^+$ : 417.1862; found: 417.1843.

**2,6-Dichlorobenzyl 2-(*tert*-Butyldimethylsilyloxy)-3-methylcycloprop-1-enecarboxylate (4f).**

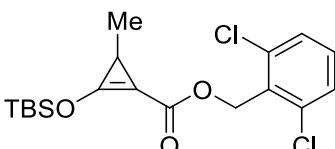
 Light yellow oil, quantitative.  $^1\text{H}$  NMR (500 MHz,  $\text{CDCl}_3$ )  $\delta$ - 7.33 (d,  $J = 7.8$  Hz, 2-H), 7.18 - 7.24 (t,  $J = 7.8$  Hz, 1H), 5.37 - 5.48 (comp, 2H), 2.32 (q,  $J = 4.8$  Hz, 1H), 1.21 (d,  $J = 4.8$  Hz, 3H), 0.92 (s, 9H), 0.22 (s, 3H), 0.21 (s, 3H);  $^{13}\text{C}$  NMR (125 MHz,  $\text{CDCl}_3$ )  $\delta$  159.4, 148.7, 137.1, 131.6, 130.3, 128.3, 76.9, 61.0, 25.3, 24.1, 19.2, 17.9, -5.4. HRMS (ESI) calculated for  $\text{C}_{18}\text{H}_{24}\text{O}_3\text{SiNaCl}_2$   $[\text{M}+\text{Na}]^+$ : 409.0769; found: 409.0770.

**Methyl 2-(*tert*-Butyldimethylsilyloxy)-3-phenylcycloprop-1-enecarboxylate (4g).**

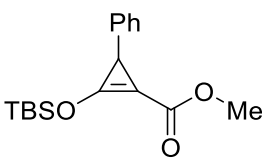
 Light yellow oil, 71% yield.  $^1\text{H}$  NMR (500 MHz,  $\text{CDCl}_3$ )  $\delta$  7.30 – 7.29 (comp, 2H), 7.20 – 7.19 (comp, 3H), 3.75 (s, 3H), 3.41 (s, 1H), 0.95 (s, 9H), 0.30 (s, 3H), 0.25 (s, 3H);  $^{13}\text{C}$  NMR (125 MHz,  $\text{CDCl}_3$ )  $\delta$  159.55, 141.63, 140.93, 128.27, 126.31, 126.01, 71.67, 33.84, 25.29, 17.93, -5.02, -5.14. HRMS (ESI) calculated for  $\text{C}_{17}\text{H}_{24}\text{O}_3\text{SiNa}$   $[\text{M}+\text{Na}]^+$ : 327.1392; found: 327.1379.

**Benzyl 2-(*tert*-Butyldimethylsilyloxy)-3-phenylcycloprop-1-enecarboxylate (4h).**

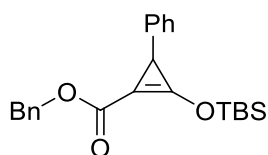

Light yellow oil, 63% yield.  $^1\text{H}$  NMR (500 MHz,  $\text{CDCl}_3$ )  $\delta$  7.38 – 7.30 (comp, 7H), 7.27 – 7.21 (comp, 3H), 5.25 (s, 2H), 3.47 (s, 1H), 0.97 (s, 9H), 0.32 (s, 3H), 0.26 (s, 3H);  $^{13}\text{C}$  NMR (125 MHz,  $\text{CDCl}_3$ )  $\delta$  158.97, 141.63, 141.25, 136.07, 128.45, 128.26, 128.21, 128.08, 126.30, 126.10, 109.99, 71.82, 66.18, 33.82, 25.30, 17.93, -5.01, -5.13. HRMS (ESI) calculated for  $\text{C}_{23}\text{H}_{28}\text{O}_3\text{SiNa}$   $[\text{M}+\text{Na}]^+$ : 403.1705; found: 403.1698.

**Methyl 4-(*tert*-Butyldimethylsilyloxy)-5-phenyl-1*H*-pyrazole-3-carboxylate (5g).**

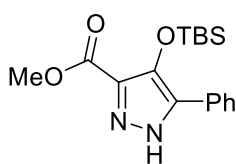

White solid, 23% yield.  $^1\text{H}$  NMR (500 MHz,  $\text{CDCl}_3$ )  $\delta$  7.74 (d,  $J$  = 8.3 Hz, 2H), 7.42 – 7.40 (comp, 2H), 7.35 – 7.34 (comp, 1H), 3.92 (s, 3H), 0.97 (s, 9H), -0.11 (s, 6H). Purified by flash chromatography ( $\text{SiO}_2$ , Hexane:EtOAc = 80:20). This compound has been previously reported; the spectroscopic data are identical to those in reference 3e.

**Benzyl 4-(*tert*-Butyldimethylsilyloxy)-5-phenyl-1*H*-pyrazole-3-carboxylate (5h).**

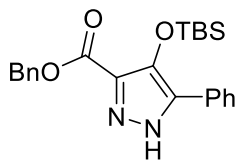

White solid, 33% yield.  $^1\text{H}$  NMR (500 MHz,  $\text{CDCl}_3$ )  $\delta$  7.74 – 7.72 (comp, 2H), 7.48 – 7.31 (comp, 8H), 5.36 (s, 2H), 0.90 (s, 9H), -0.16 (s, 6H);  $^{13}\text{C}$  NMR (125 MHz,  $\text{CDCl}_3$ )  $\delta$  187.91, 159.37, 139.25, 135.26, 131.18, 128.92, 128.62, 128.57, 128.36, 128.07, 127.50, 66.62, 25.53, 18.01, -4.86. HRMS (ESI) calculated for  $\text{C}_{23}\text{H}_{28}\text{O}_3\text{N}_2\text{SiNa}$   $[\text{M}+\text{Na}]^+$ : 431.1767; found: 431.1755. Purified by flash chromatography ( $\text{SiO}_2$ , Hexane:EtOAc = 80:20).

## Procedures for the Asymmetric Cyclopropanation of Donor–Acceptor Cyclopropene **4a** with Styrenes

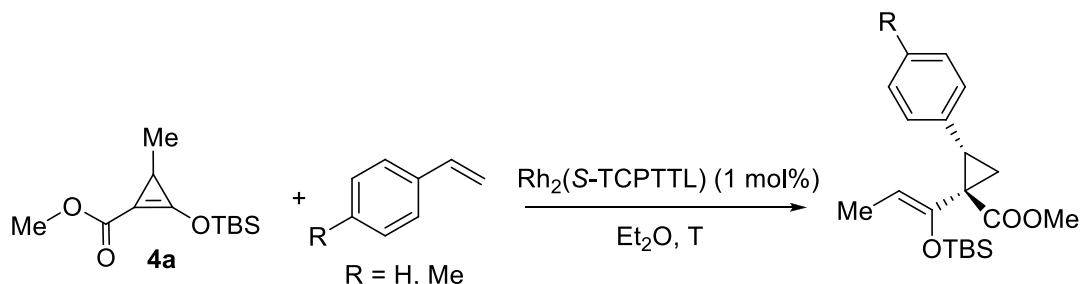

The catalyst  $\text{Rh}_2(\text{S-TCPTTL})_4$  (1 mol%, 5.4 mg, 0.003 mmol) was dissolved in  $\text{Et}_2\text{O}$  (1.0 mL). After addition of styrene (312 mg, 3.0 mmol) or 4-methylstyrene (354 mg, 3.0 mmol) the mixture was cooled to  $-20\text{ }^\circ\text{C}$  or  $-40\text{ }^\circ\text{C}$ , and **4a** (0.3 mmol) which was generated from **Z-3a** (81.1 mg, 0.3 mmol) under thermal conditions, in  $\text{Et}_2\text{O}$  (1.0 mL) was added dropwise over 30 minutes. After the addition stirring was continued for 6 h. The solvent was evaporated and the residue was characterized by  $^1\text{H}$  NMR spectral analysis to determine the diastereoselectivities. Then the reaction mixture was purified by flash chromatography ( $\text{SiO}_2$ , Hexane:EtOAc = 95:5) to afford **7** as colorless oil.

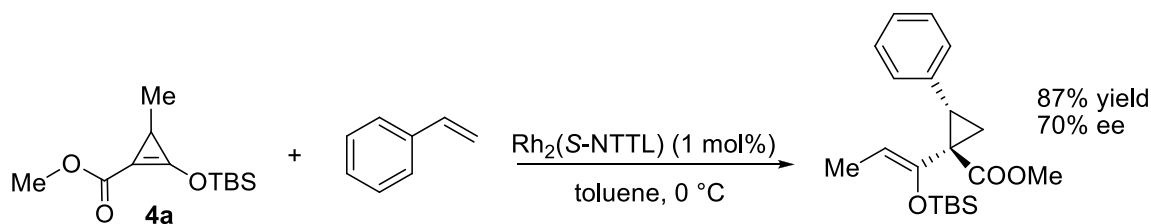

The same procedure was applied here as the cyclopropanation catalyzed by  $\text{Rh}_2(\text{S-TCPTTL})_4$ , except the  $\text{Rh}_2(\text{S-TCPTTL})_4$  was replaced by  $\text{Rh}_2(\text{S-NTTL})_4$ . And the solvent was replaced from  $\text{Et}_2\text{O}$  to toluene.

## Procedures for the Asymmetric Cyclopropanation of Enoldiazoacetate **Z-3a** with Styrenes

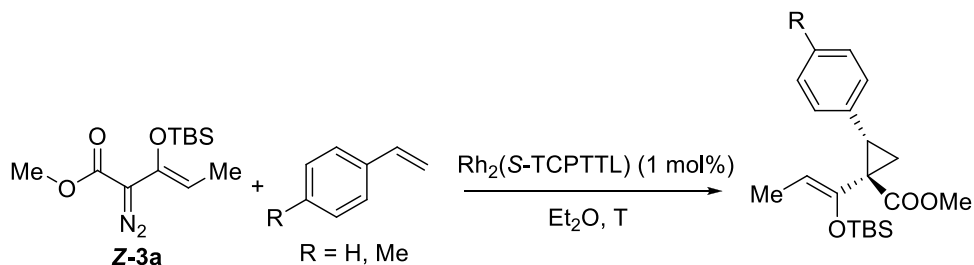

The same procedure was applied here as the cyclopropanation of donor–acceptor cyclopropene **4a** with styrenes, except the donor–acceptor cyclopropene **4a** was replaced by enoldiazoacetate **Z-3a**.

**(1*R*,2*S*)-Methyl 1-[(*Z*)-1-(*tert*-Butyldimethylsilyloxy)prop-1-enyl]-2 phenylcyclopropanecarboxylate (**7**).**

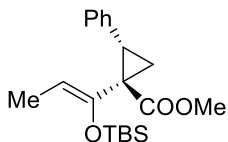

Following the procedures for the asymmetric cyclopropanation of donor–acceptor cyclopropene **4a** with styrenes from 0.3 mmol **4a** (74 mg) and styrene 3.0 mol (312 mg). Colorless oil, 93 mg, 90% yield.  $[\alpha]_D^{22} = -182^\circ$  ( $c = 1.93$ ,  $\text{CHCl}_3$ , pour 91% ee). 91% ee, HPLC condition for determination of enantiomeric excess: OD-H column, 254 nm, 0.5 mL/min, hexanes:IPA = 97:1,  $t_r = 7.2, 7.8$  min.  $^1\text{H}$  NMR (500 MHz,  $\text{CDCl}_3$ )  $\delta$  7.25 – 7.13 (comp, 3H), 7.08 (comp, 2H), 4.52 (q,  $J = 6.5$  Hz, 1H), 3.72 (s, 3H), 2.89 (dd,  $J = 9.3, 7.5$  Hz, 1H), 1.79 (dd,  $J = 9.3, 4.7$  Hz, 1H), 1.67 (dd,  $J = 7.5, 4.7$  Hz, 1H), 1.41 (d,  $J = 6.5$  Hz, 3H), 0.76 (s, 9H), 0.05 (s, 3H), -0.07 (s, 3H);  $^{13}\text{C}$  NMR (125 MHz,  $\text{CDCl}_3$ )  $\delta$  174.0, 143.6, 137.1, 127.9, 127.7, 126.3, 109.8, 52.2, 38.3, 33.2, 25.6, 22.5, 18.3, 10.8, -4.4, -4.5. The relative and absolute configurations were assigned following the reference 4.

**(1*R*,2*S*)-Methyl 1-[(*Z*)-1-(*tert*-Butyldimethylsilyloxy)prop-1-enyl]-2-*p*-tolylcyclopropanecarboxylate (**8**).**

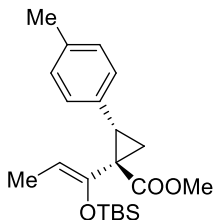

Following the procedures for the asymmetric cyclopropanation of donor–acceptor cyclopropene **4a** with styrenes from 0.3 mmol **4a** (74 mg) and 4-methyl styrene 3.0 mol (354 mg). White solid, 92 mg, 86% yield, m.p. 41–43 °C.  $[\alpha]_D^{22} = -145^\circ$  ( $c = 1.54$ ,  $\text{CHCl}_3$ , pour 92% ee). 92% ee, HPLC condition for determination of enantiomeric excess: OD-H column, 230 nm, 0.5 mL/min, hexanes:methanol = 99:1,  $t_r = 10.0, 10.8$  min.  $^1\text{H}$  NMR (500 MHz,  $\text{CDCl}_3$ )  $\delta$  7.02 (d,  $J = 8.2$  Hz, 2H), 6.95 (d,  $J = 8.2$  Hz, 2H), 4.50 (q,  $J = 6.6$  Hz, 1H), 3.71 (s, 3H), 2.85 (dd,  $J = 9.4, 7.5$  Hz, 1H), 2.29 (s, 3H), 1.77 (dd,  $J = 9.4, 4.6$  Hz, 1H), 1.63 (dd,  $J = 7.5, 4.6$  Hz, 1H), 1.41 (d,  $J = 6.6$  Hz, 3H), 0.77 (s, 9H), 0.05 (s, 3H), -0.08 (s, 3H);  $^{13}\text{C}$  NMR (125 MHz,  $\text{CDCl}_3$ )  $\delta$  174.1, 143.6, 135.9, 134.0, 128.4, 127.8, 109.8, 52.1, 38.1, 33.1, 25.6,

22.4, 20.9, 18.3, 10.9, -4.4, -4.5. The relative and absolute configurations were assigned following reference 4.

## References

1. (a) P. Müller, Y. Allenbach, E. Robert, *Tetrahedron: Asymmetry* **2003**, *14*, 779; (b) A. Ghanem, M. G. Gardiner, R. M. Williamson, P. Müller, *Chem. Eur. J.* **2010**, *16*, 3291. (c) N. Shimada, M. Anada, S. Nakamura, H. Nambu, H. Tsutsui, S. Hashimoto, *Org. Lett.* **2008**, *10*, 3603; (d) N. Shimada, T. Oohara, J. Krishnamurthi, H. Nambu, S. Hashimoto, *Org. Lett.* **2011**, *13*, 6284.
2. (a) X. Xu, Y. Deng, D. N. Yim, P. Y. Zavalij, M. P. Doyle, *Chem. Sci.* **2015**, *6*, 2196; (b) M. K. Choi, W. Yu, C. Che, *Org. Lett.* **2005**, *7*, 1081; (c) M. Grohmann, G. Maas, *Tetrahedron* **2007**, *63*, 12172; (c) M. P. Doyle, M. S. Shanklin, S. M. Oon, H. Q. Pho, F. R. Van der Heide, W. R. Veal, *J. Org. Chem.* **1988**, *53*, 3384.
3. (a) H. M. L. Davies, Z.-Q. Peng and J. H. Houser, *Tetrahedron Lett.* **1994**, *35*, 8939; (b) Y. Ueda, G. Roberge and V. Vinet, *Can. J. Chem.* **1984**, *62*, 2936; (c) H. M. L. Davies, G. Ahmed and M. R. Churchill, *J. Am. Chem. Soc.* **1996**, *118*, 10774; (d) K. Kundu and M. P. Doyle, *Tetrahedron: Asymmetry* **2006**, *17*, 574; (e) Y. Qian, X. Xu, X. Wang, P. J. Zavalij, W. Hu and M. P. Doyle, *Angew. Chem. Int. Ed.* **2012**, *51*, 5900; (f) X. Xu, P. J. Zavalij and M. P. Doyle, *Chem. Commun.* **2013**, *49*, 10287; (g) X. Xu, X. Wang, P. Y. Zavalij and M. P. Doyle, *Org. Lett.* **2015**, *17*, 790; (h) X. Xu, P. Y. Zavalij and M. P. Doyle, *J. Am. Chem. Soc.* **2013**, *135*, 12439.
4. P. Muller, G. Bernardinelli, Y. F. Allenbach, M. Ferri, H. D. Flack, *Org. Lett.* **2004**, *6*, 1725.



# NMR Spectra of 1, 2, 3, 5, 7 and 8

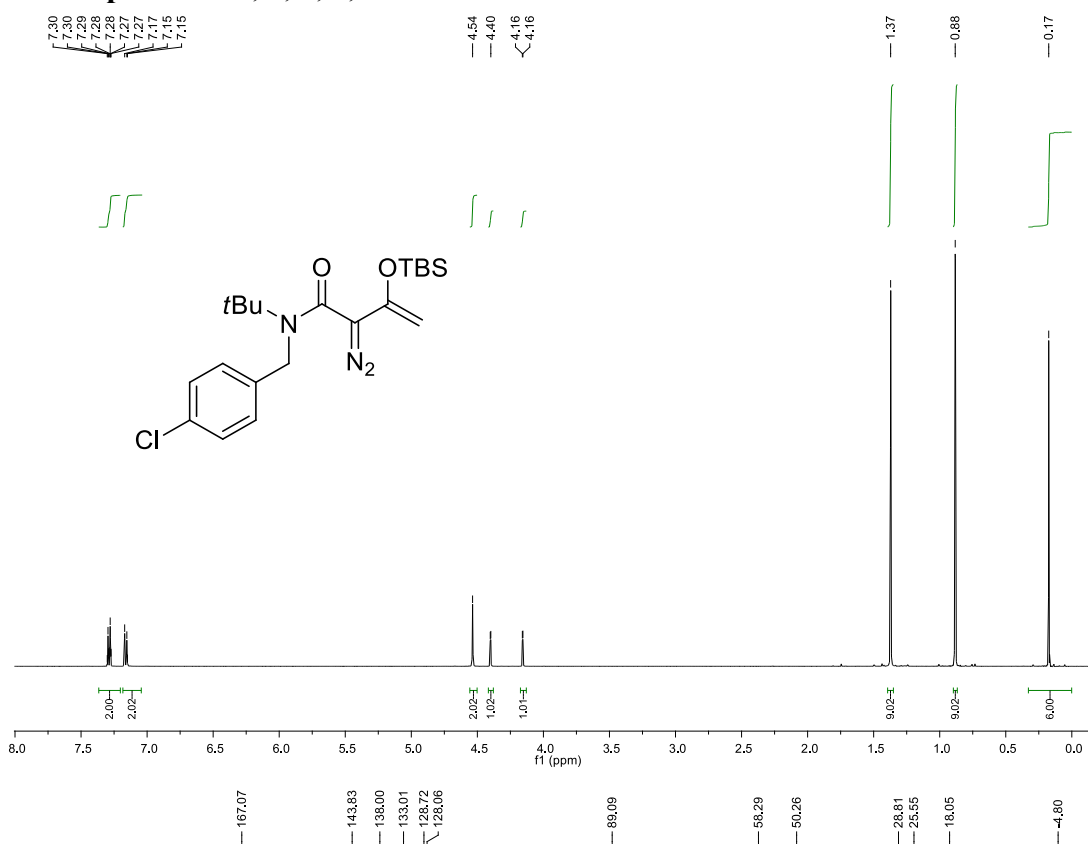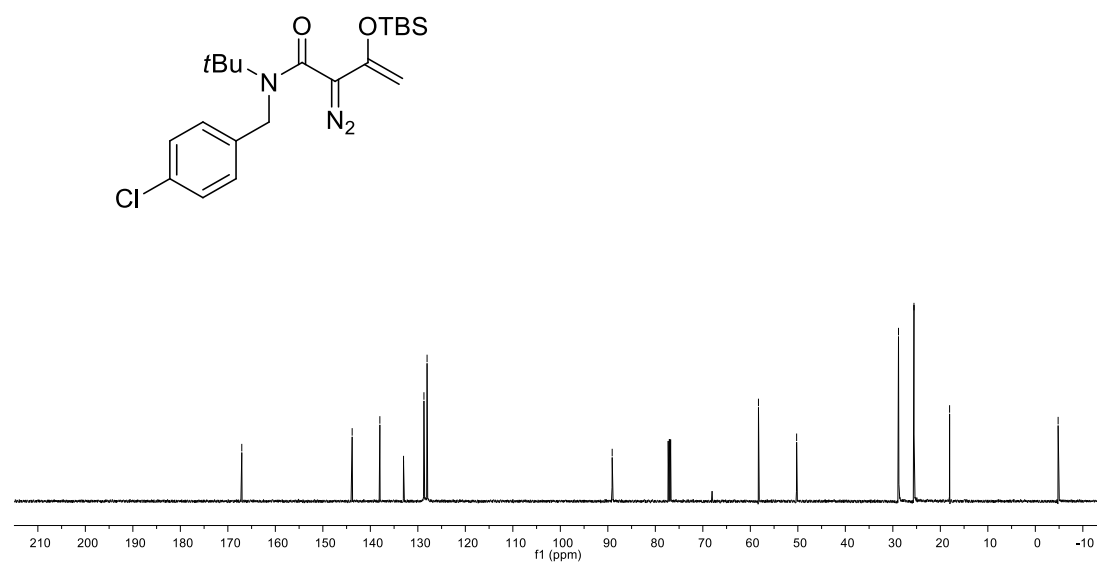

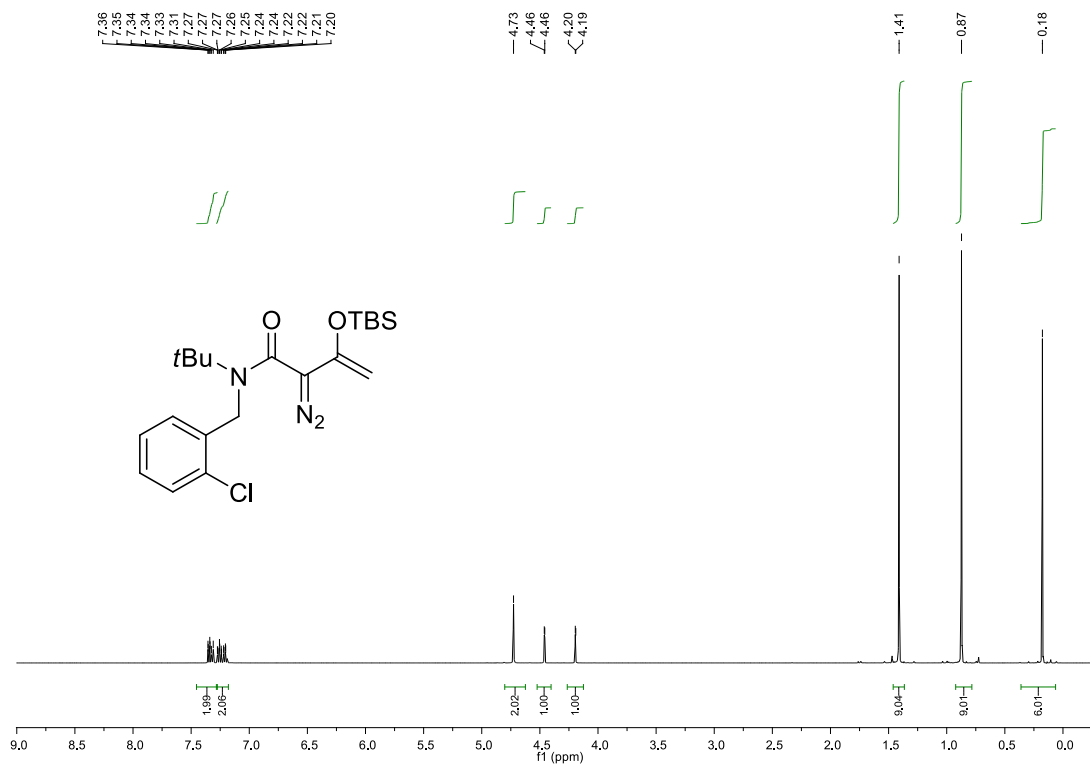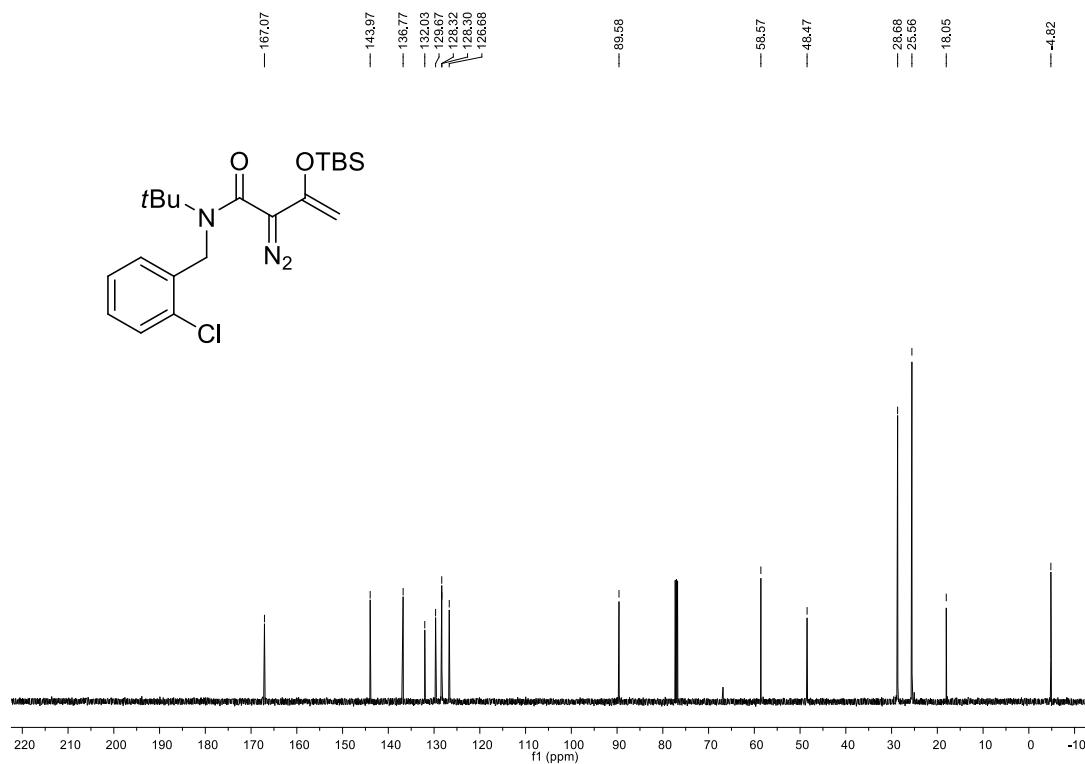

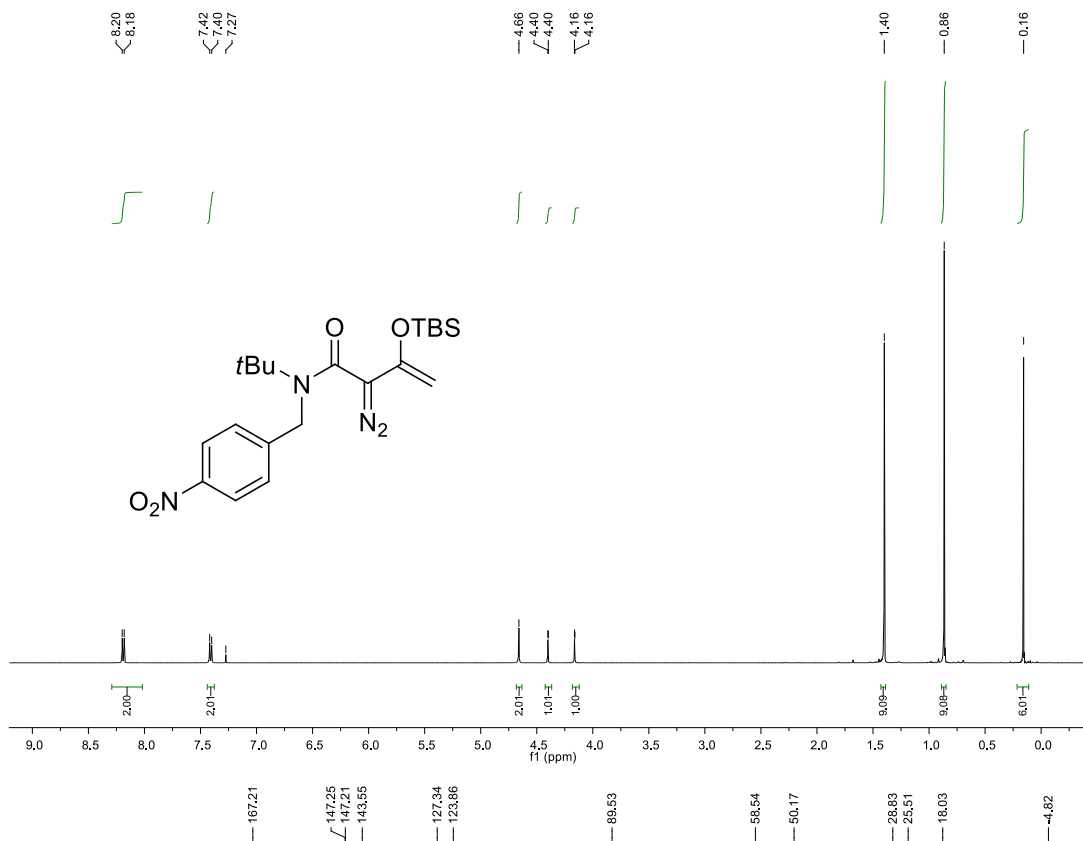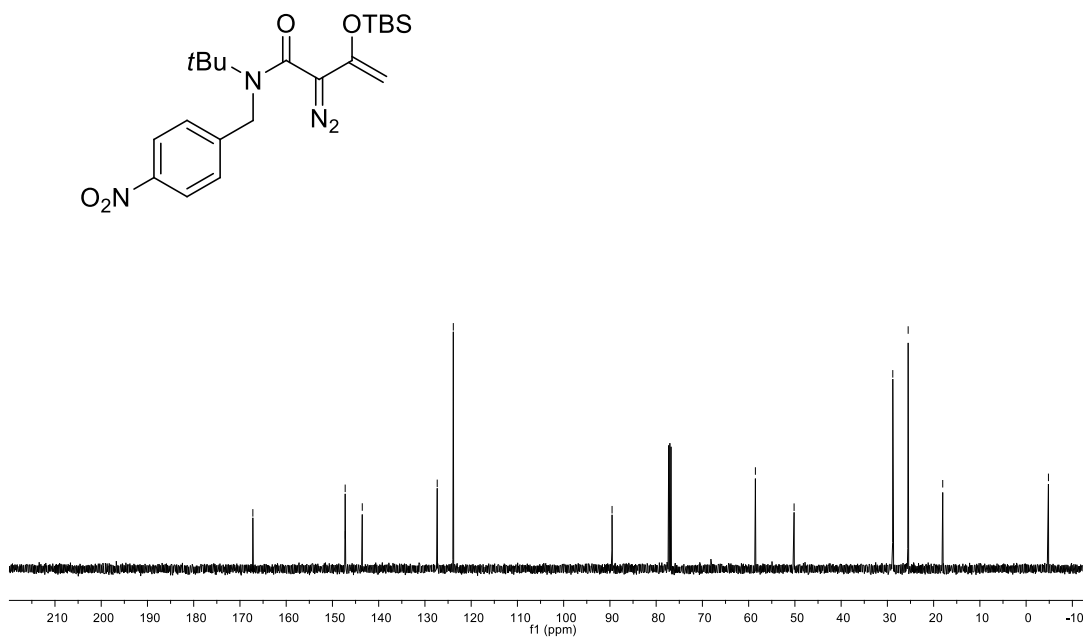

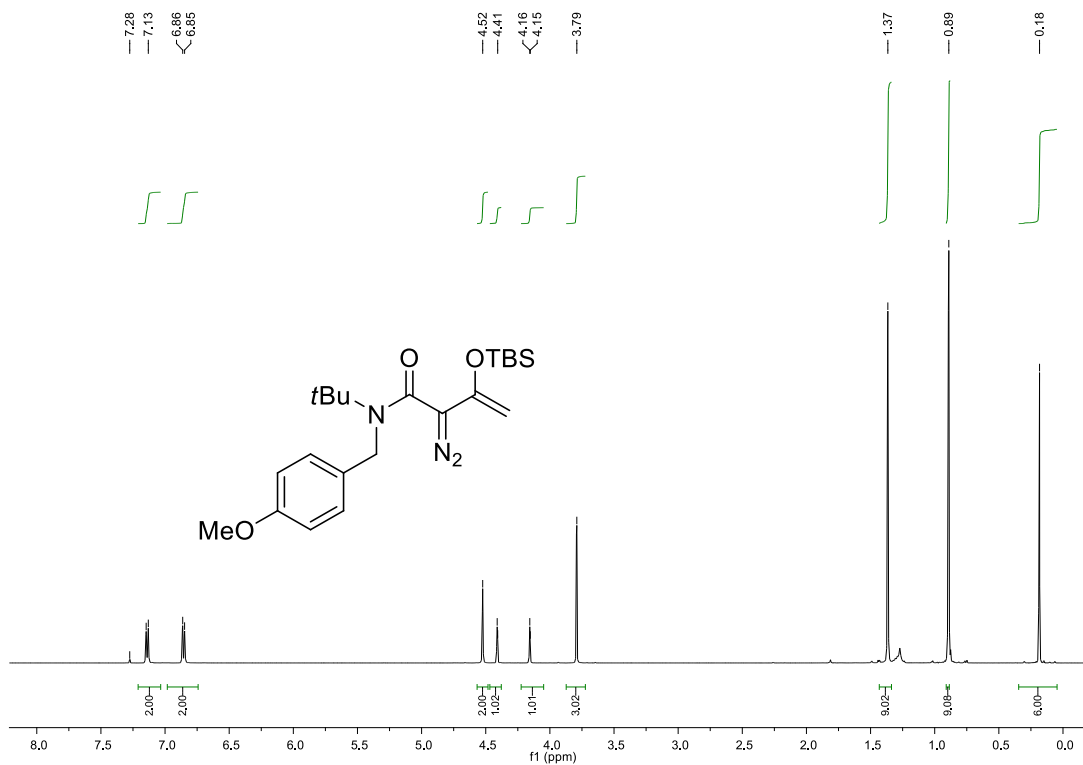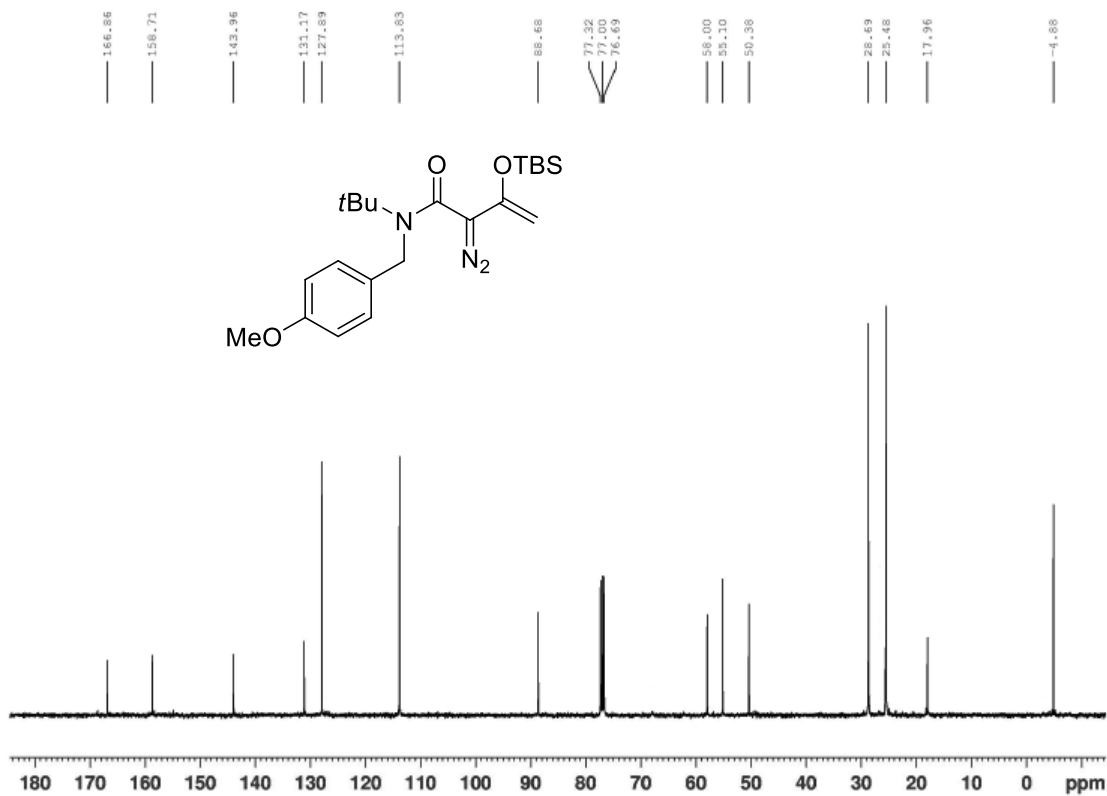

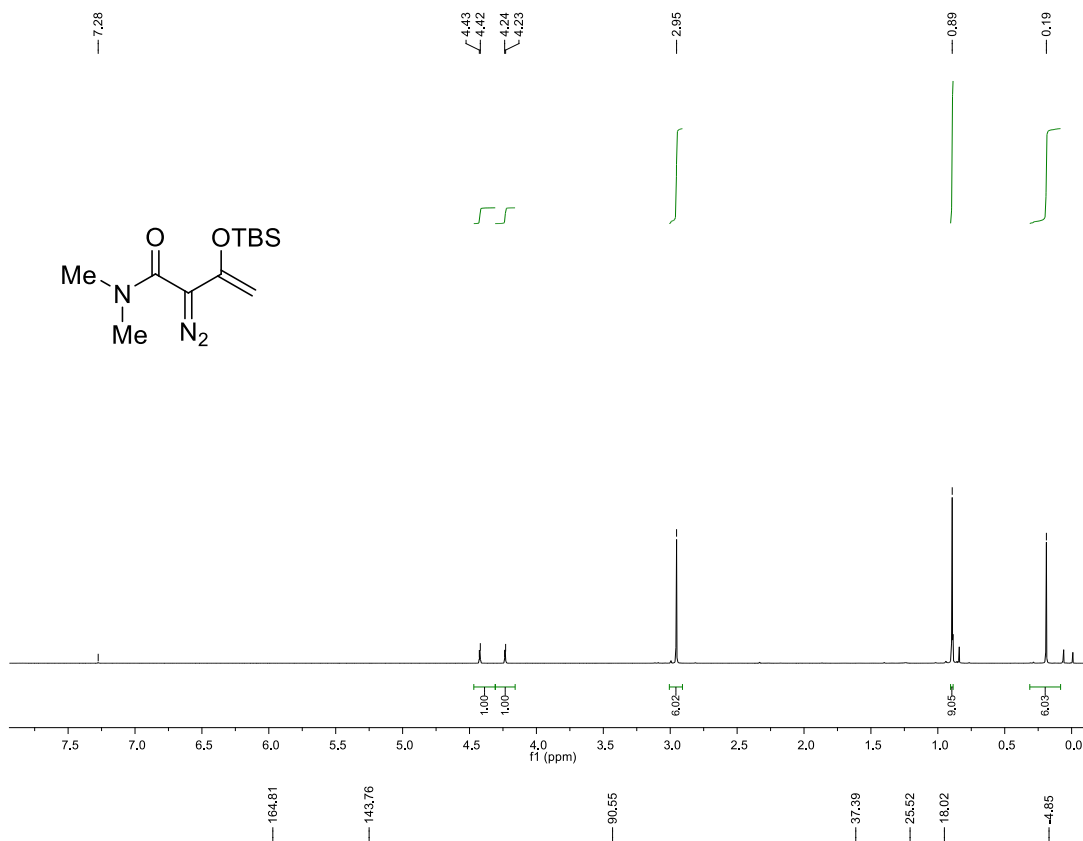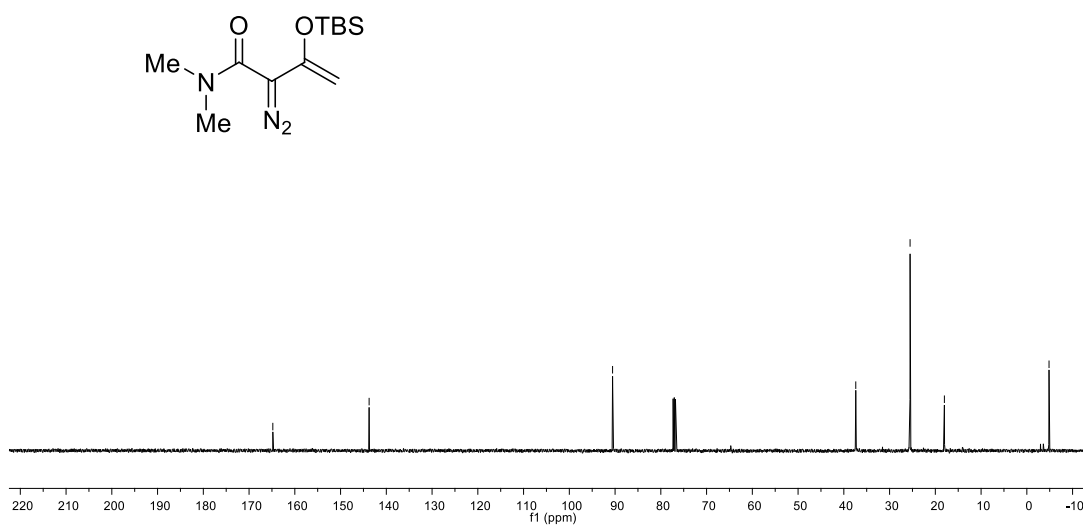

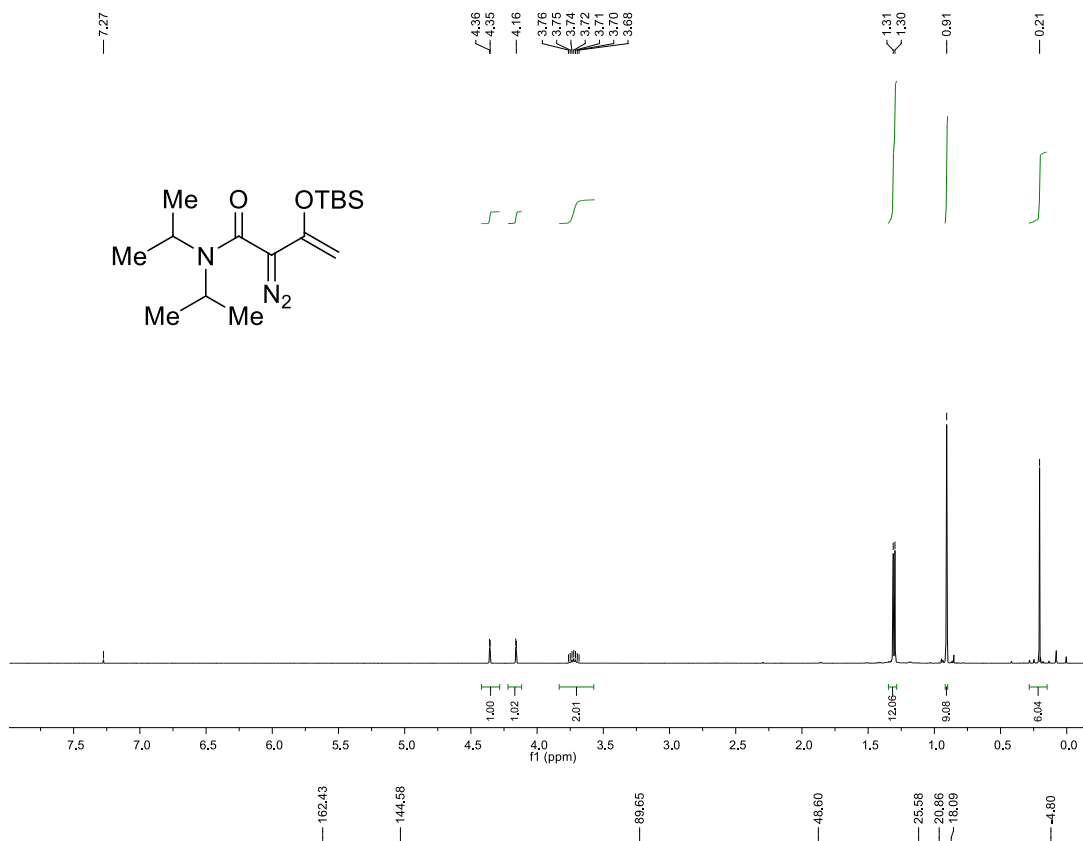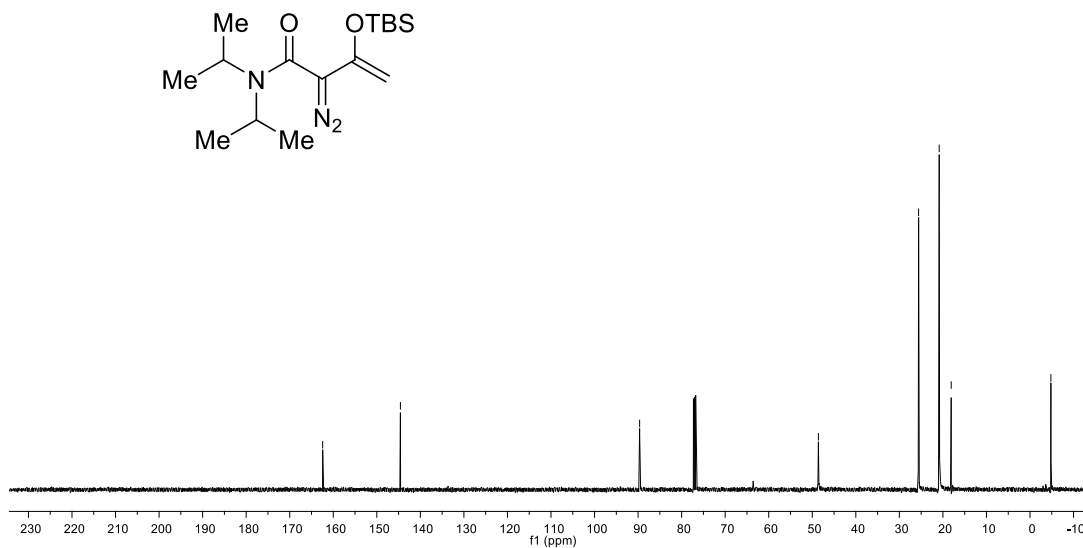

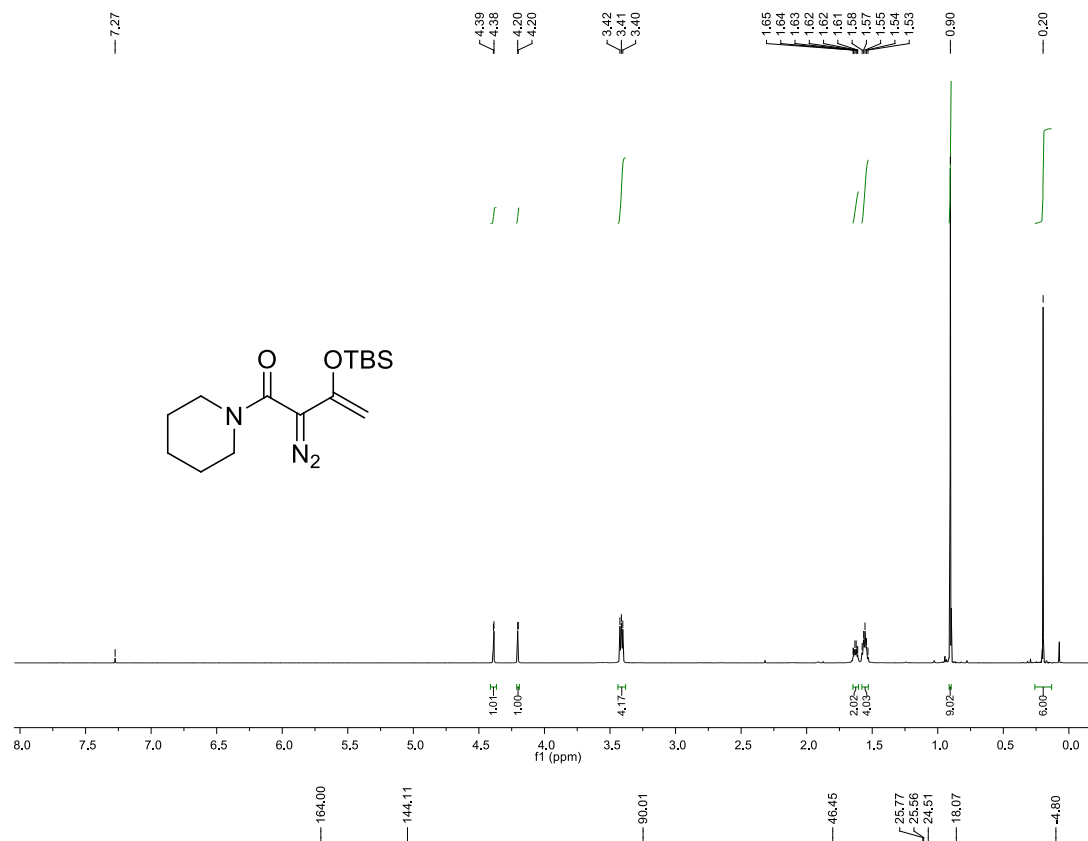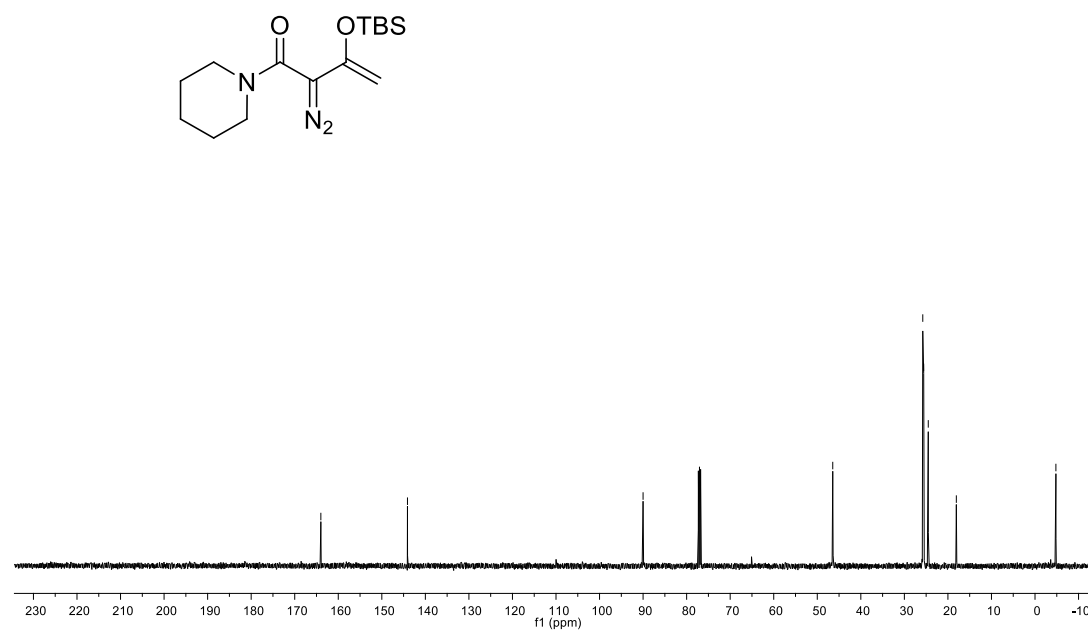

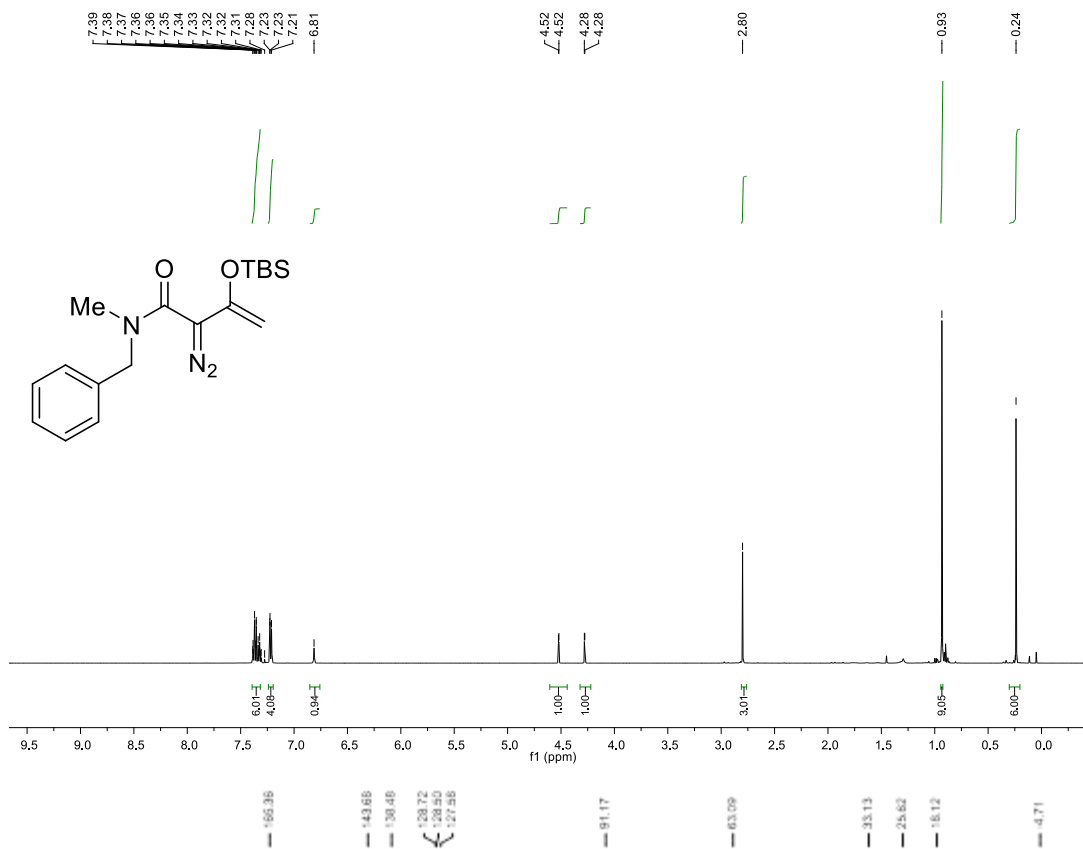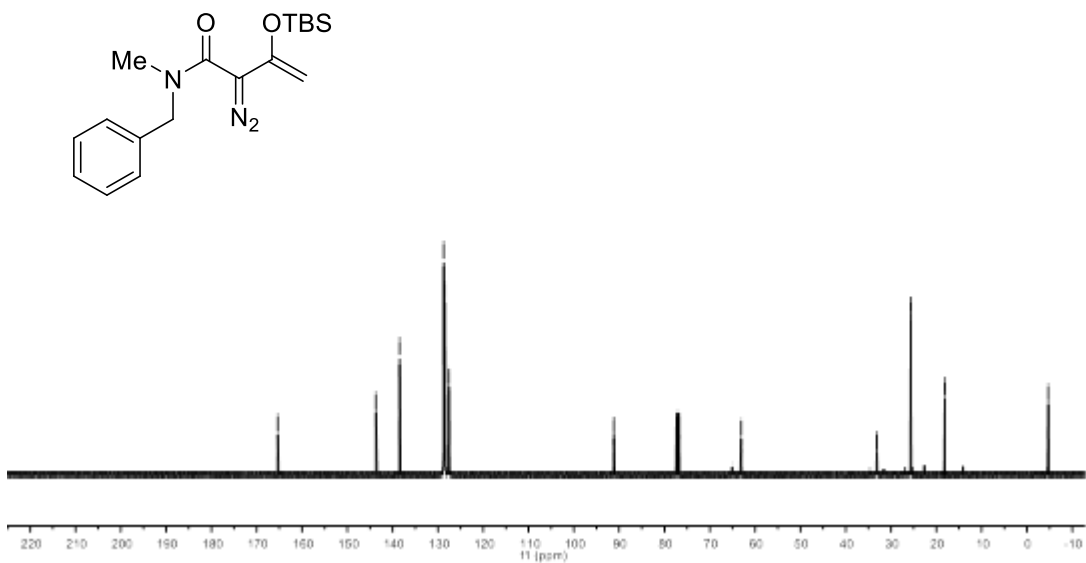



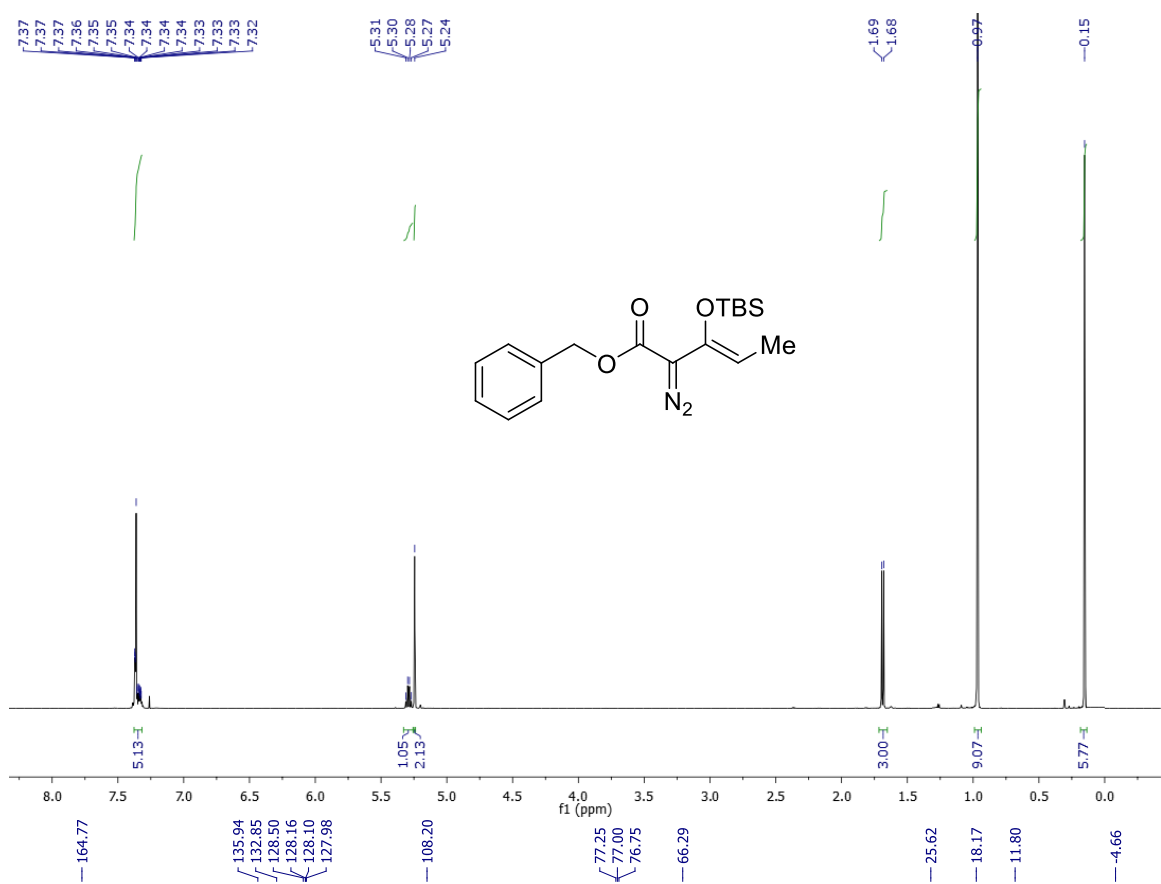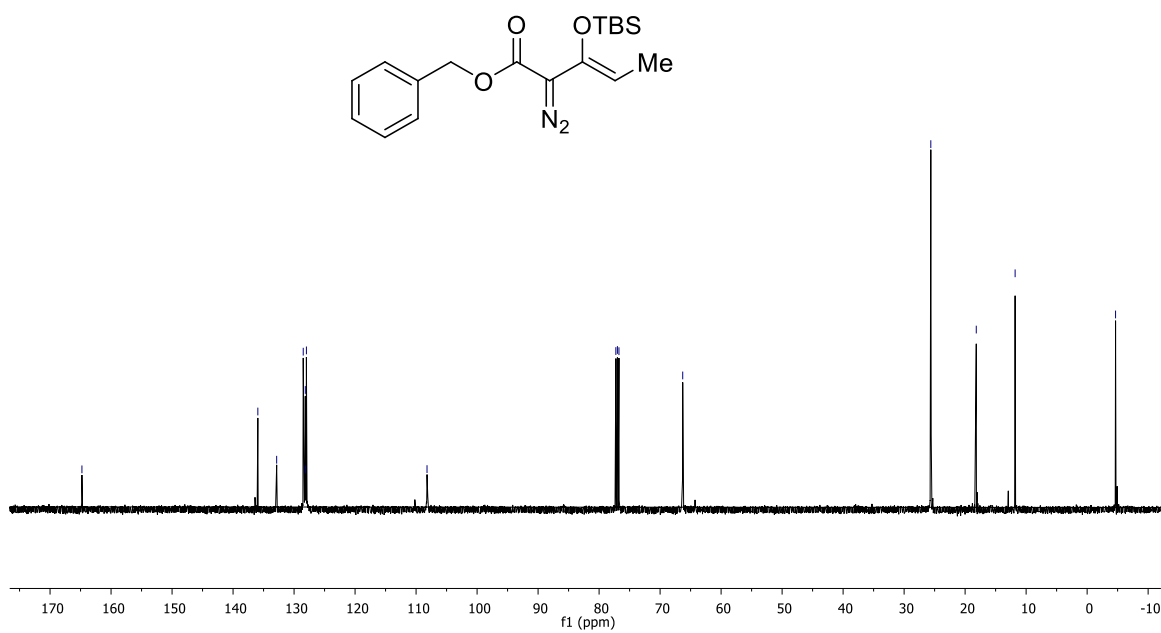

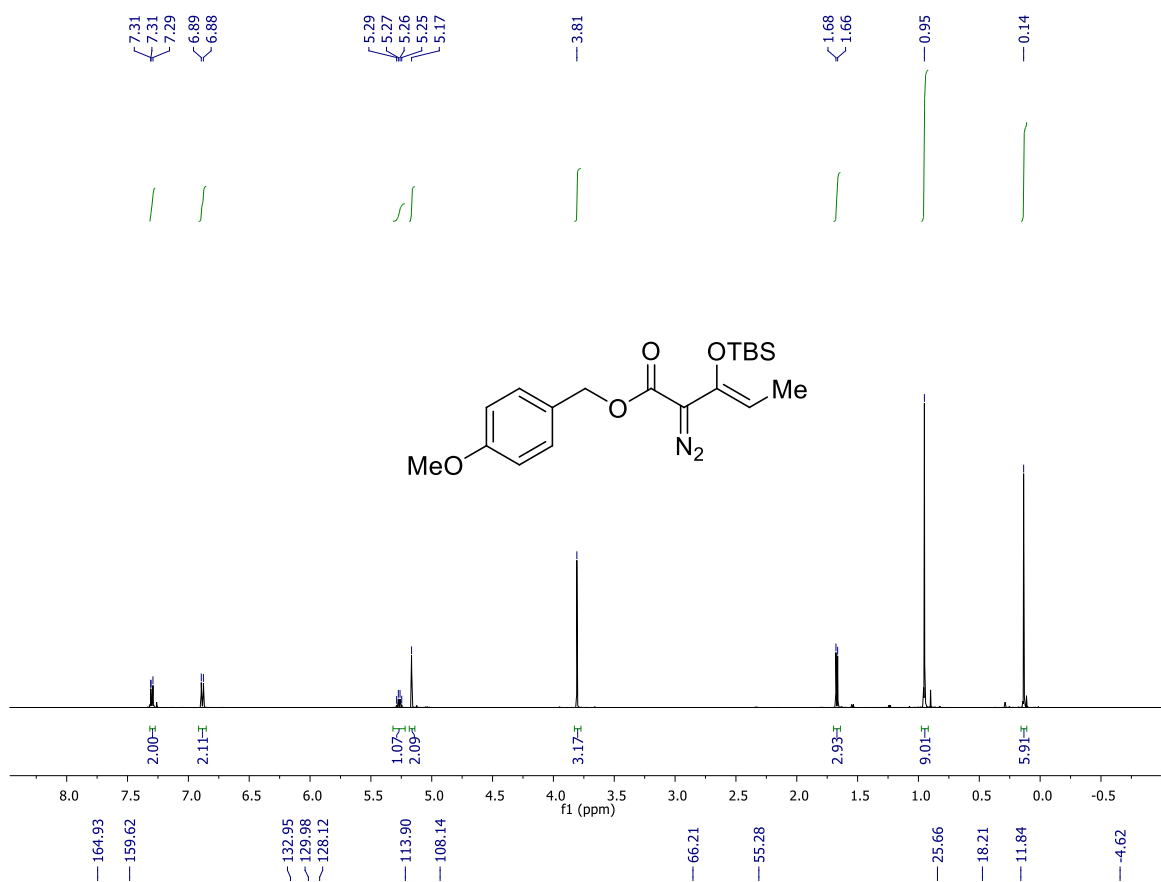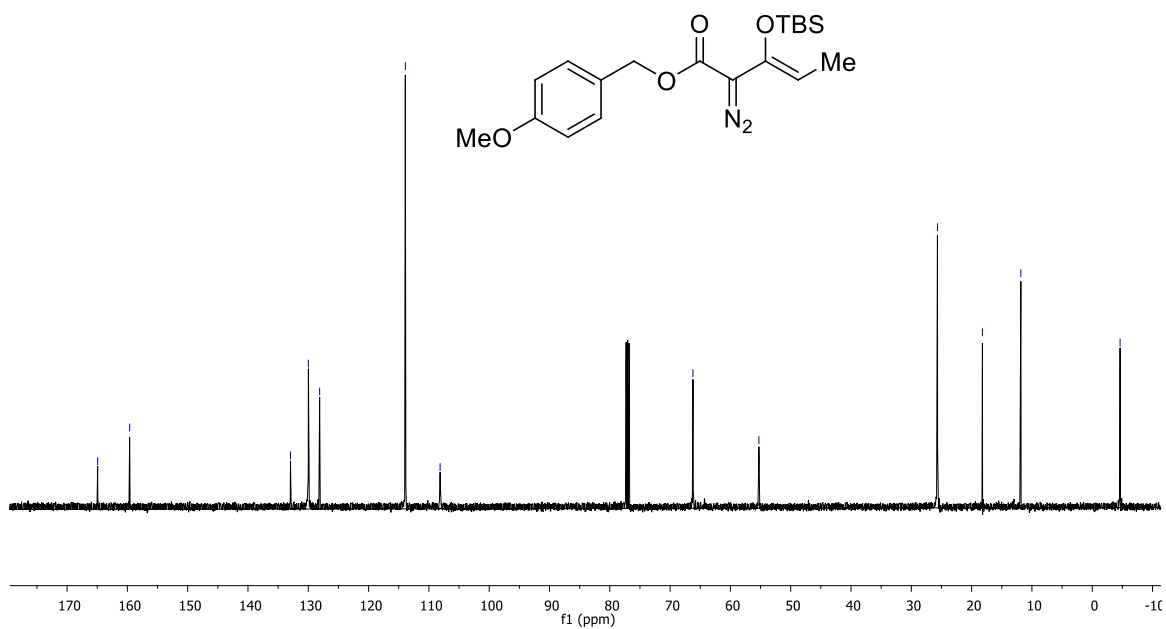

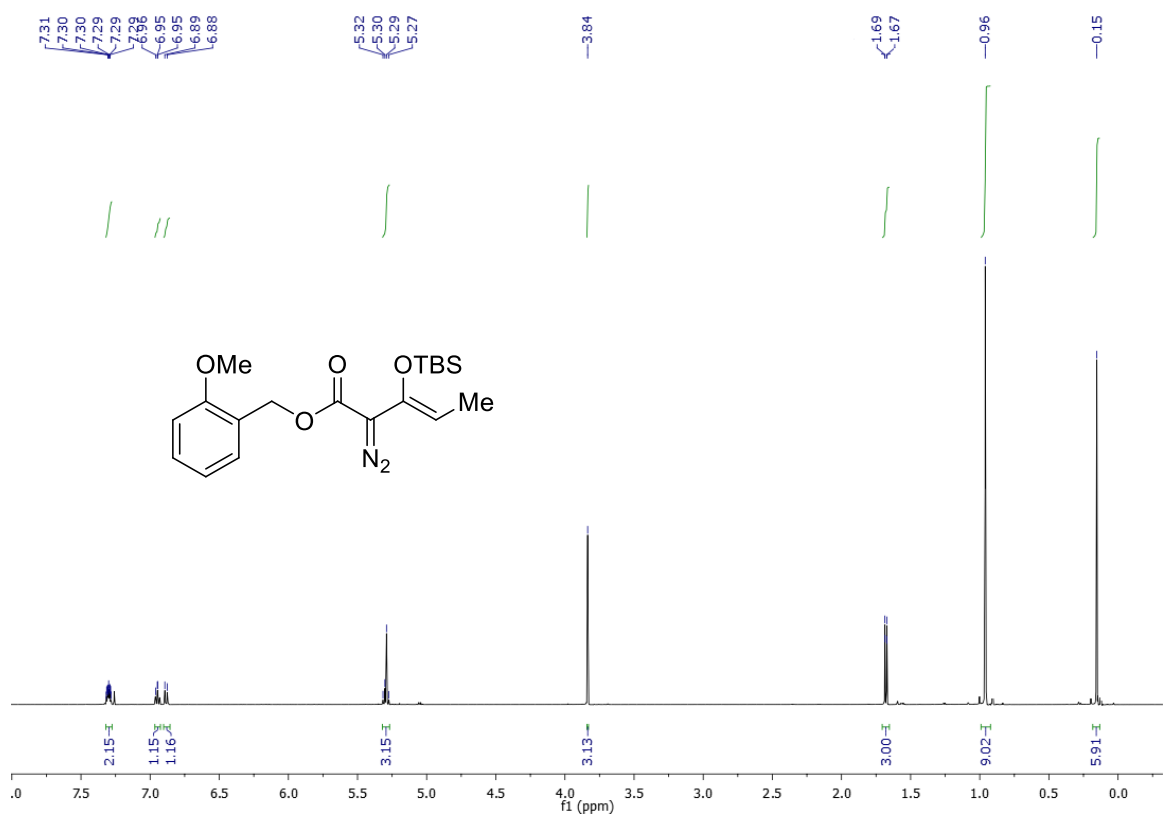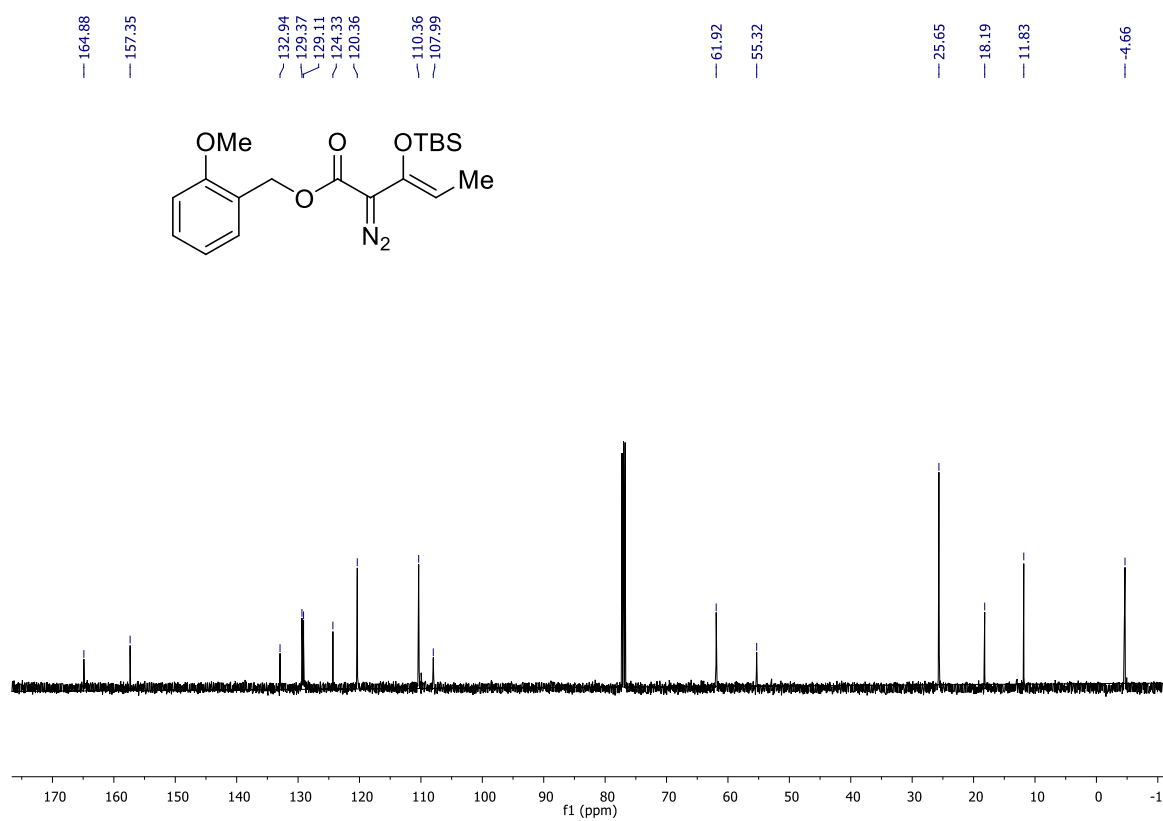

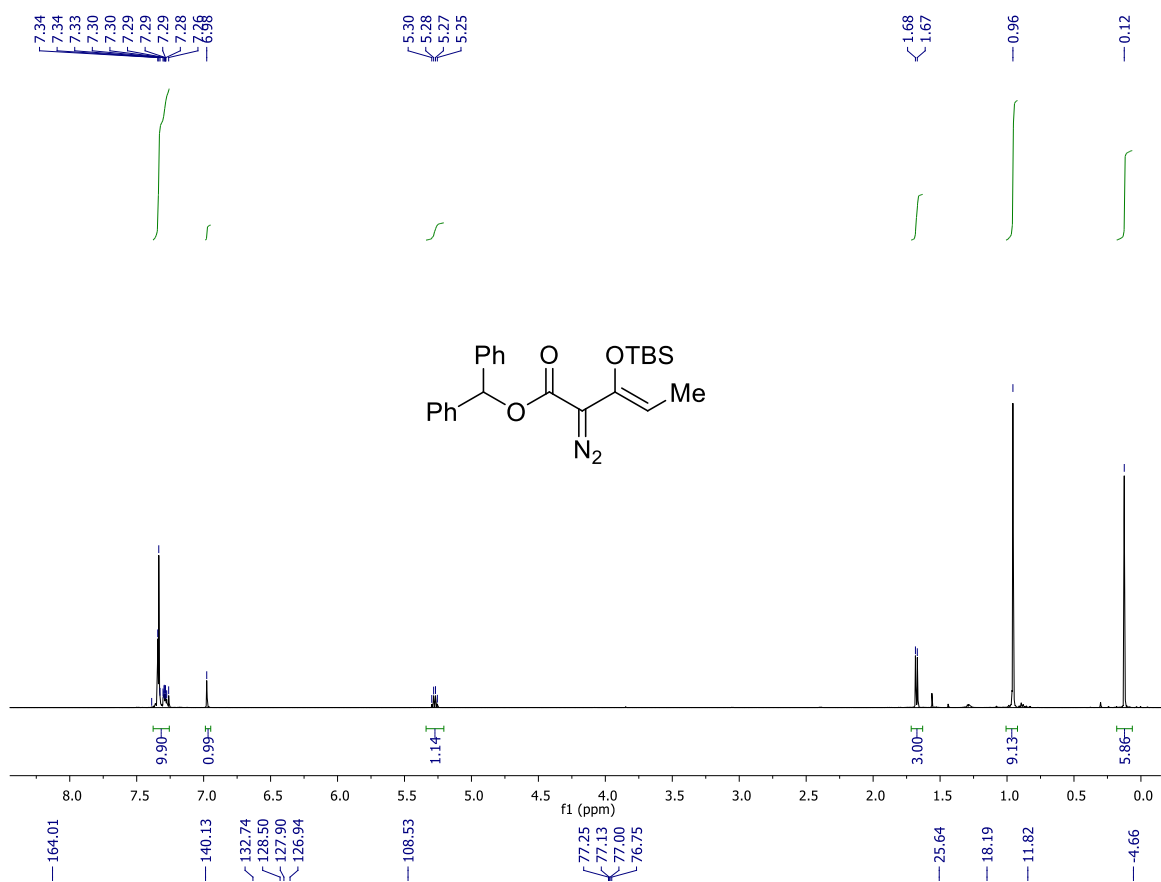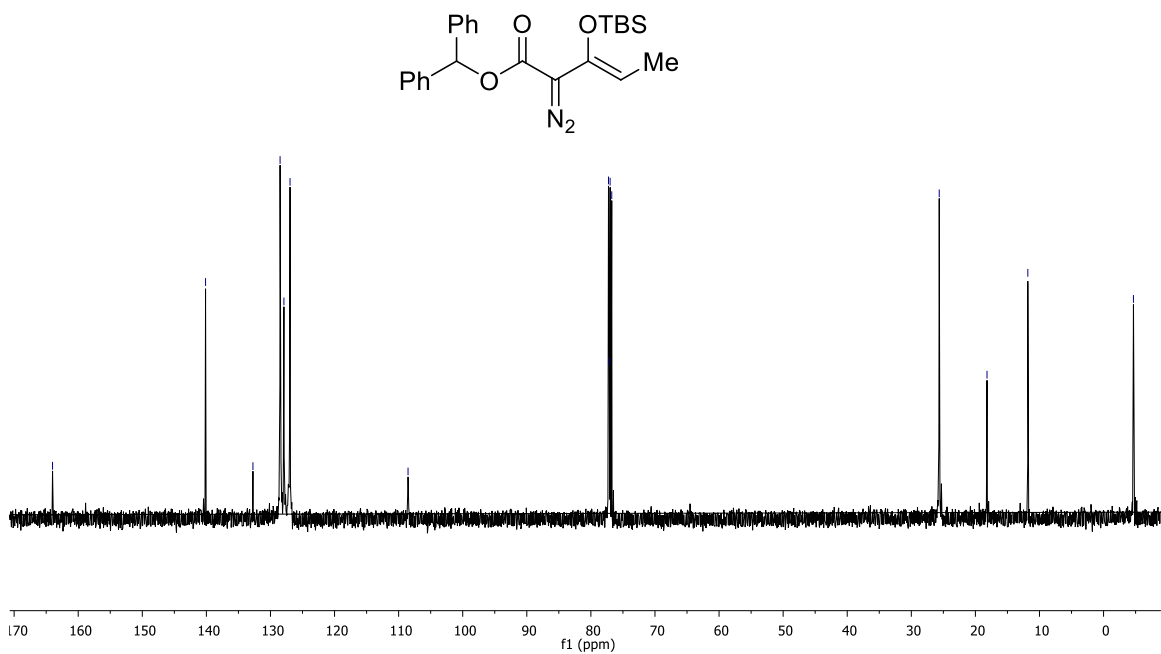

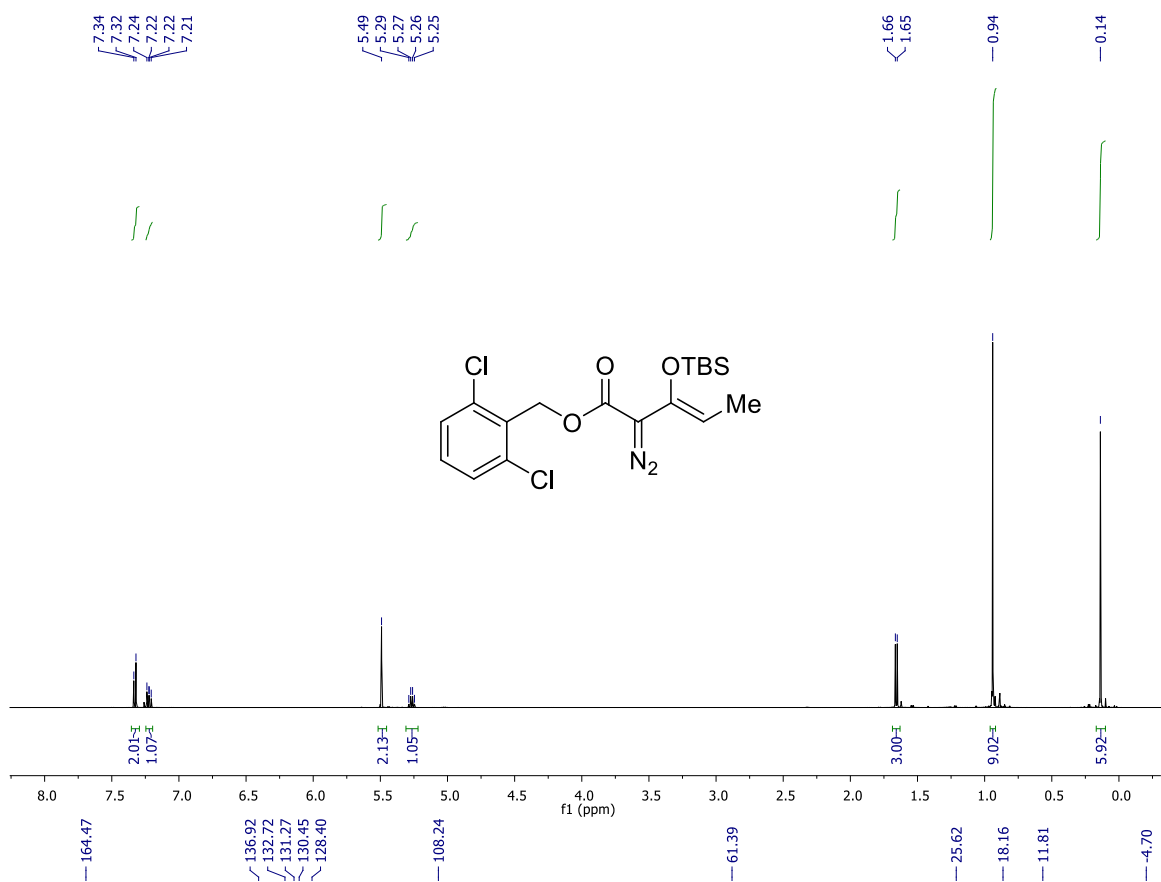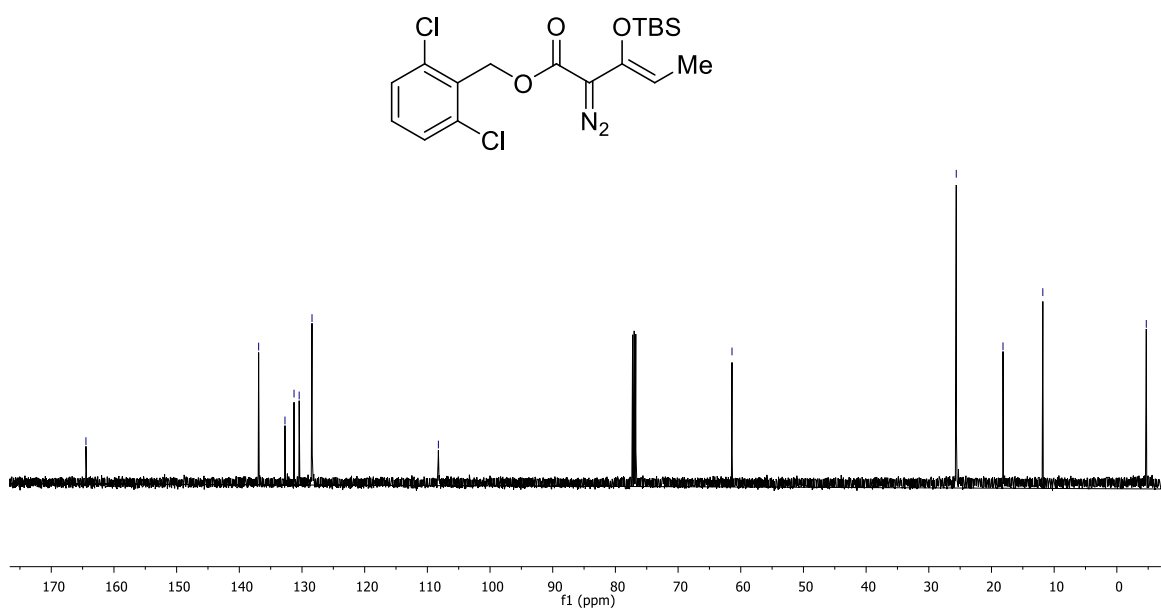

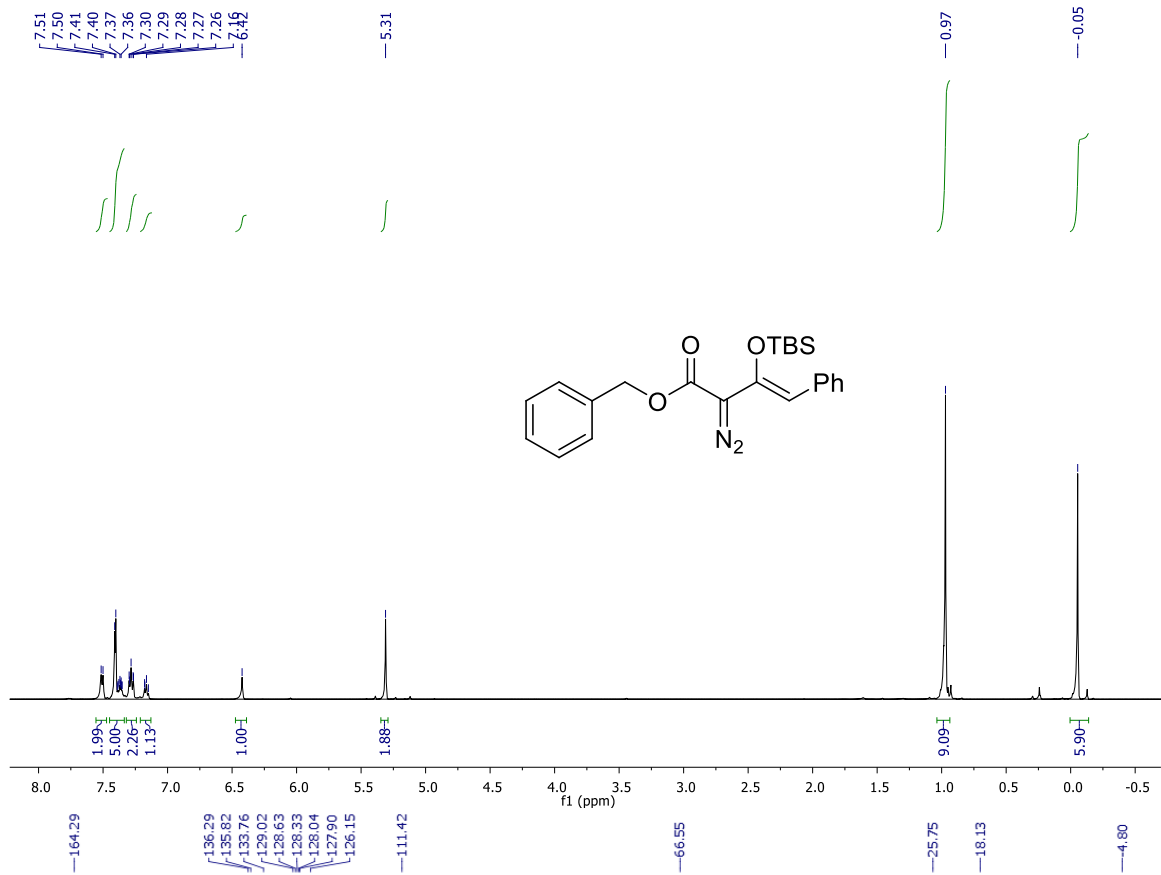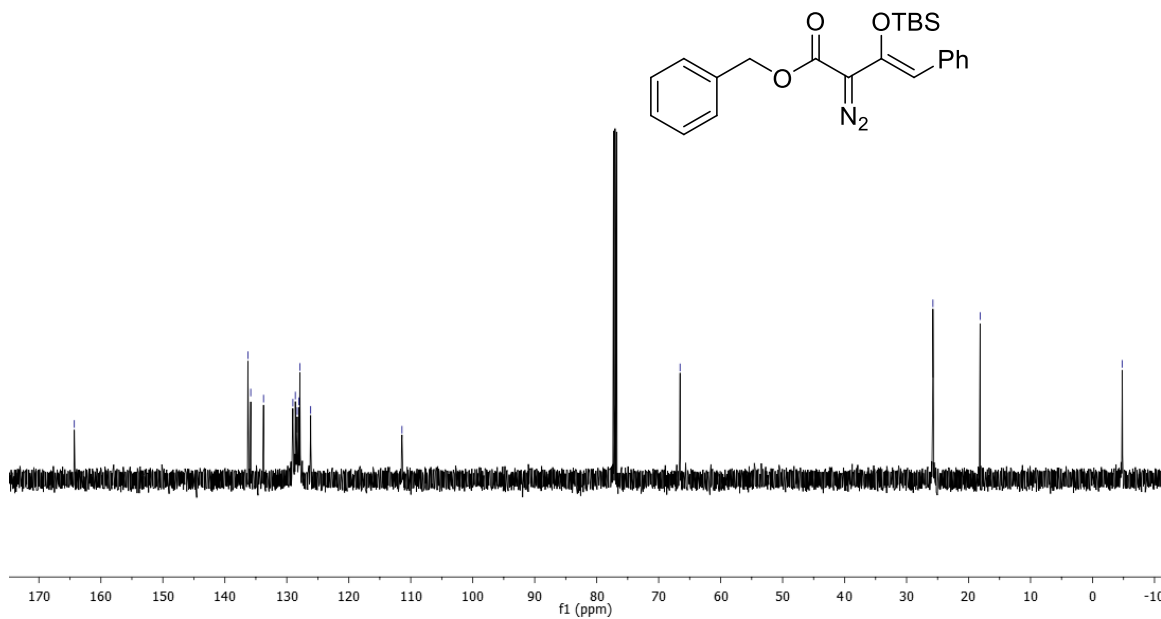

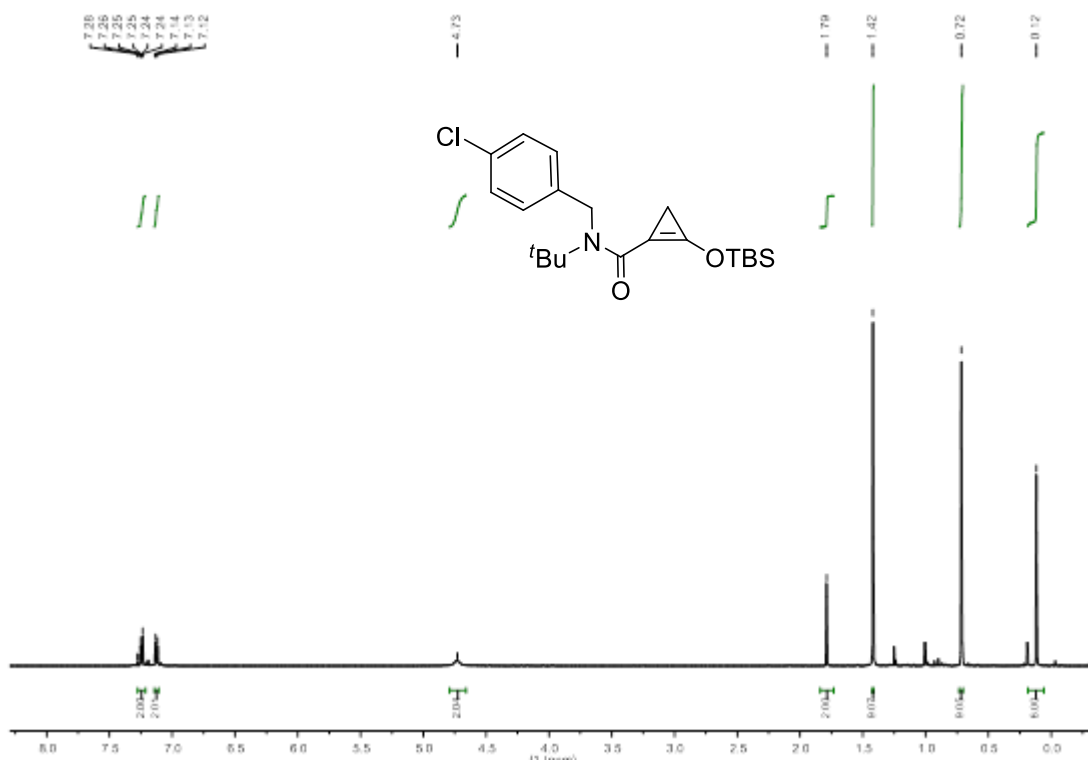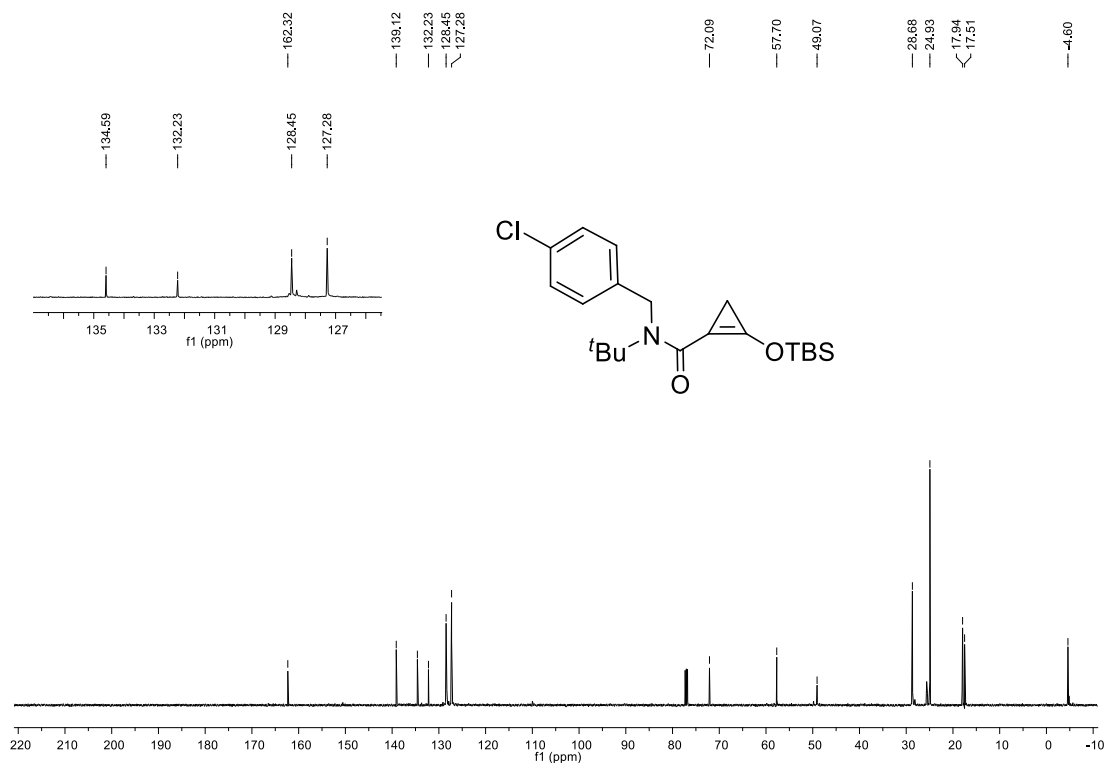

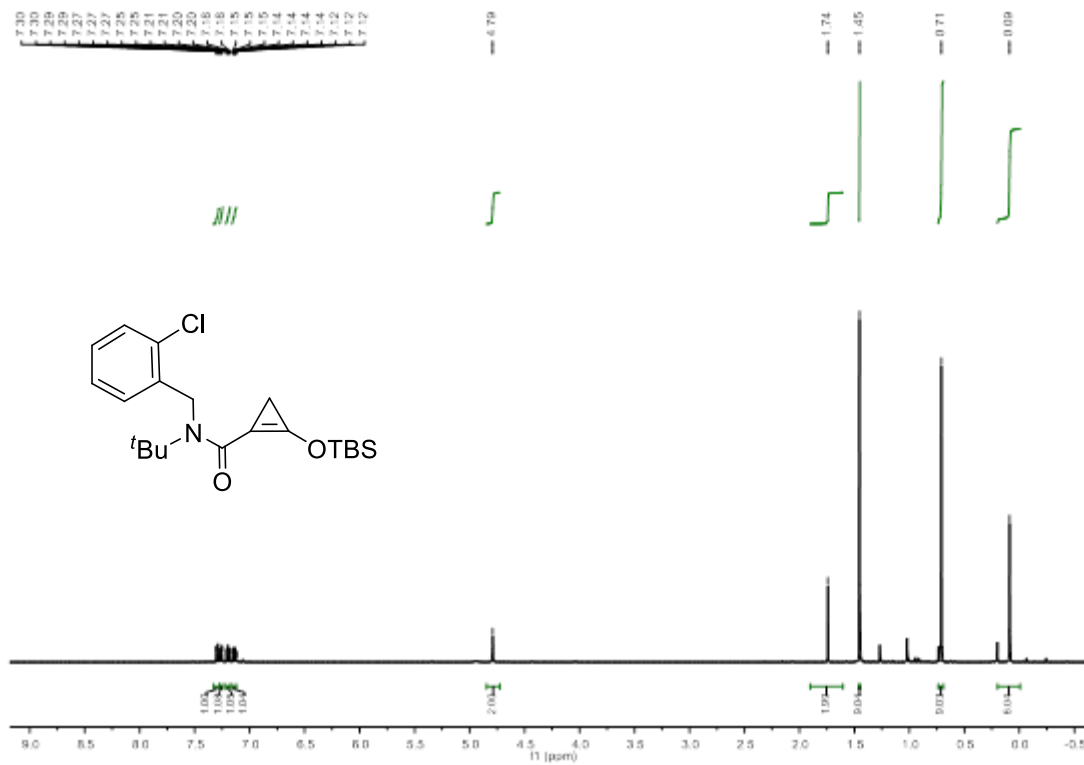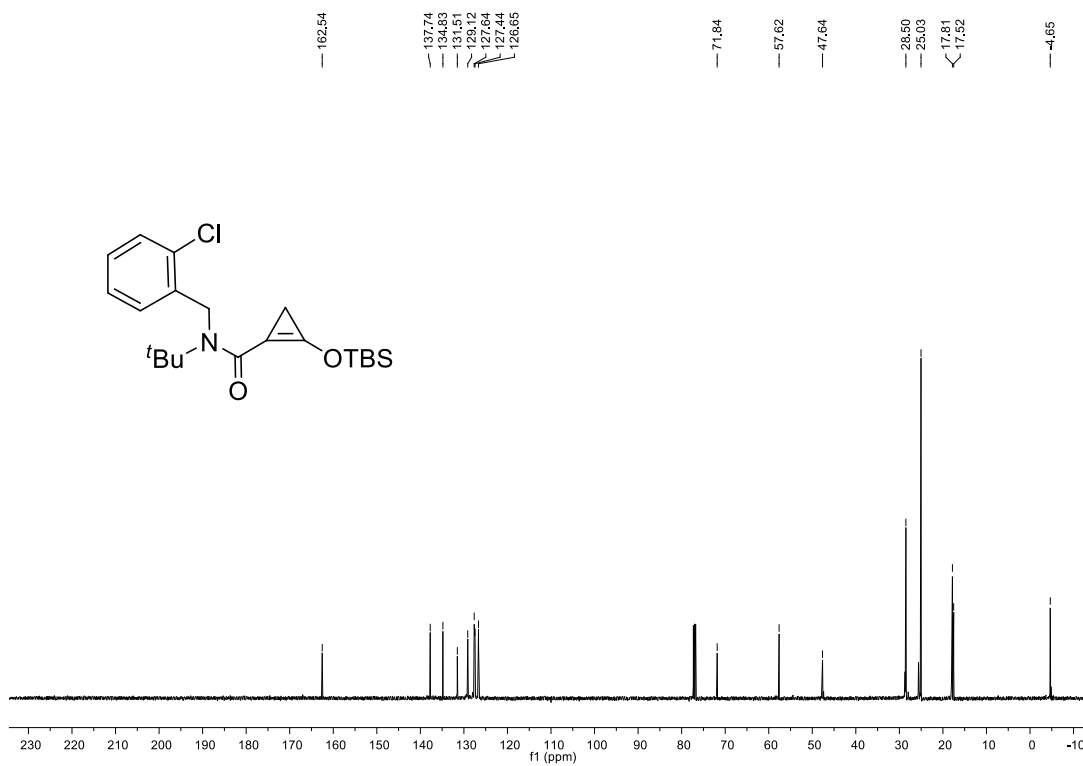



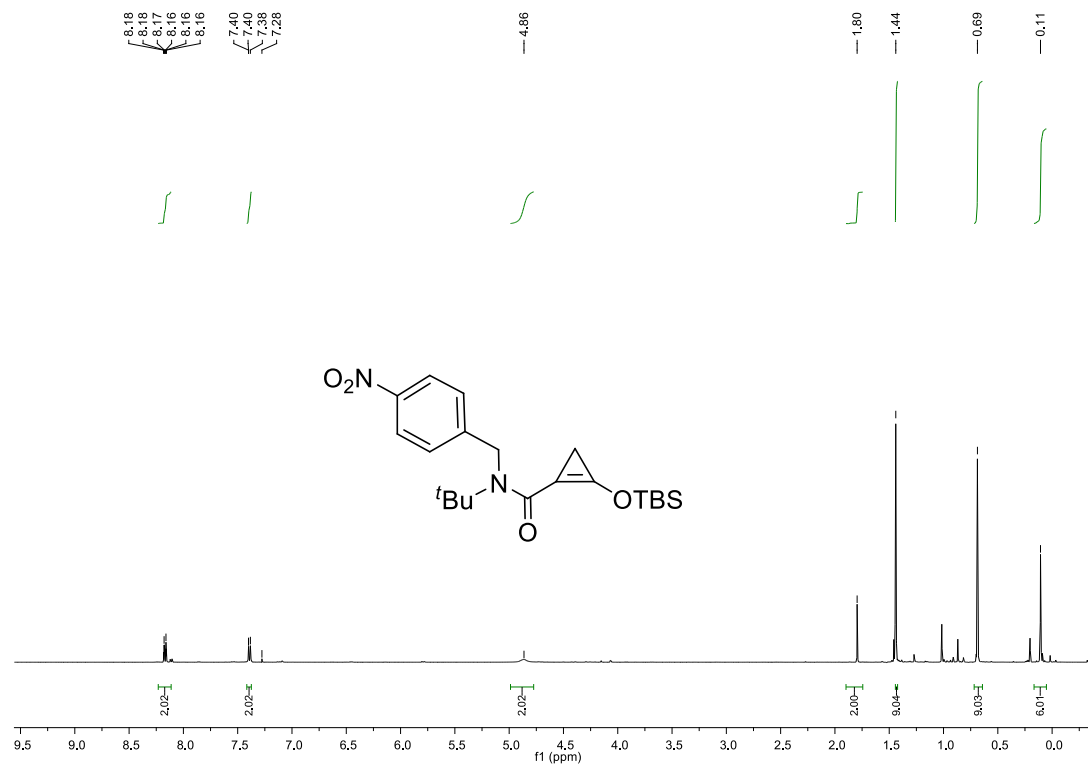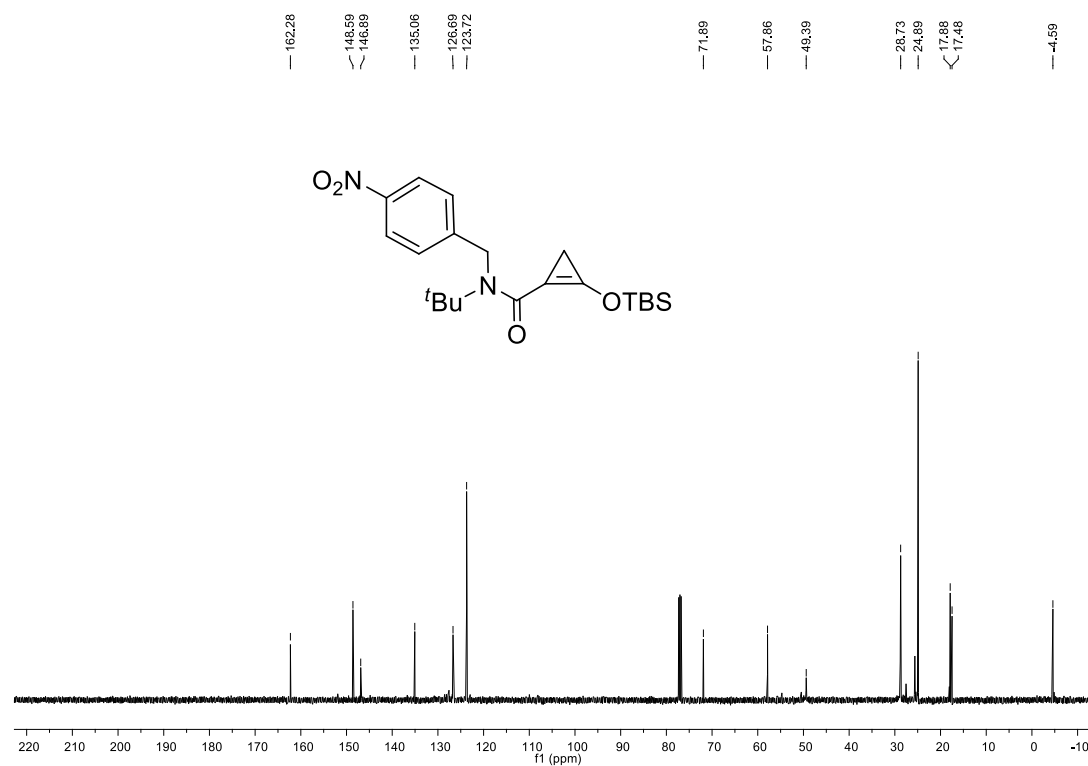

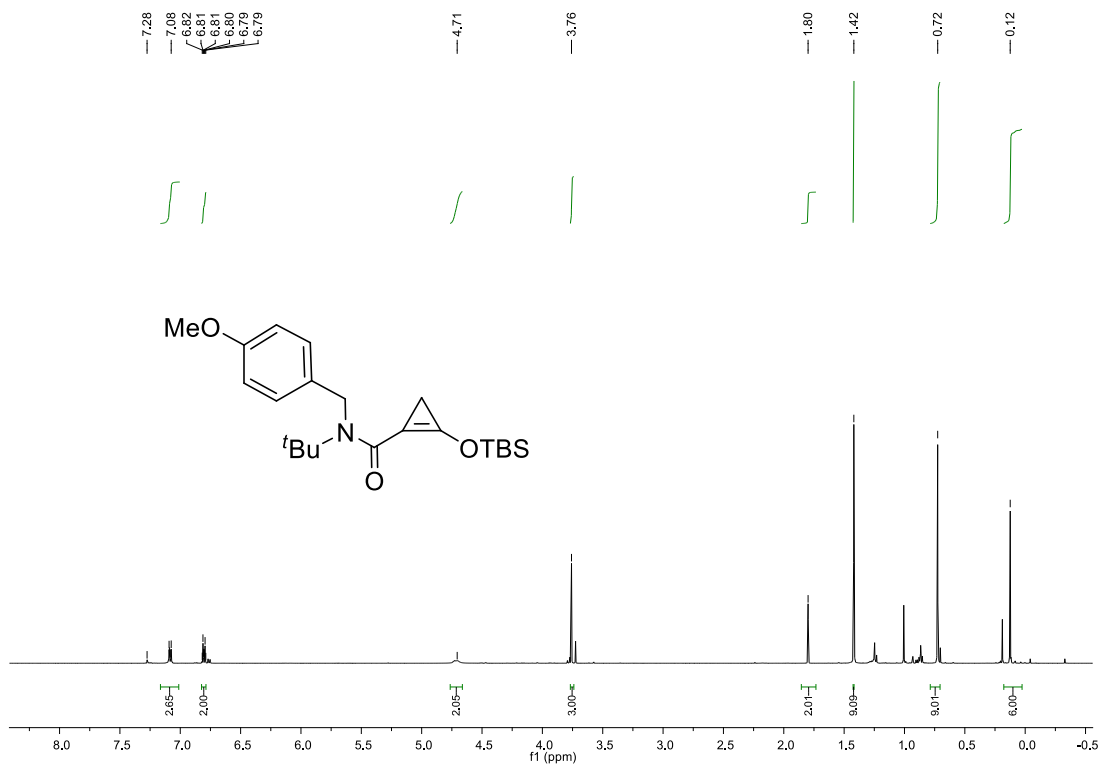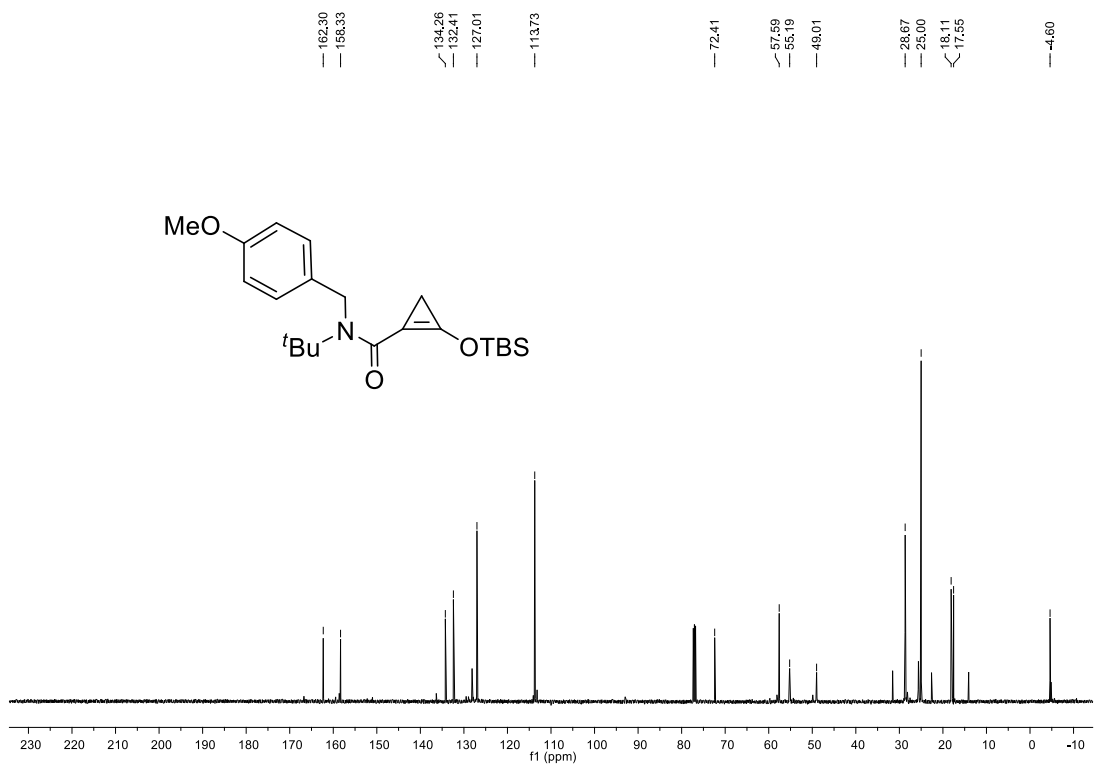

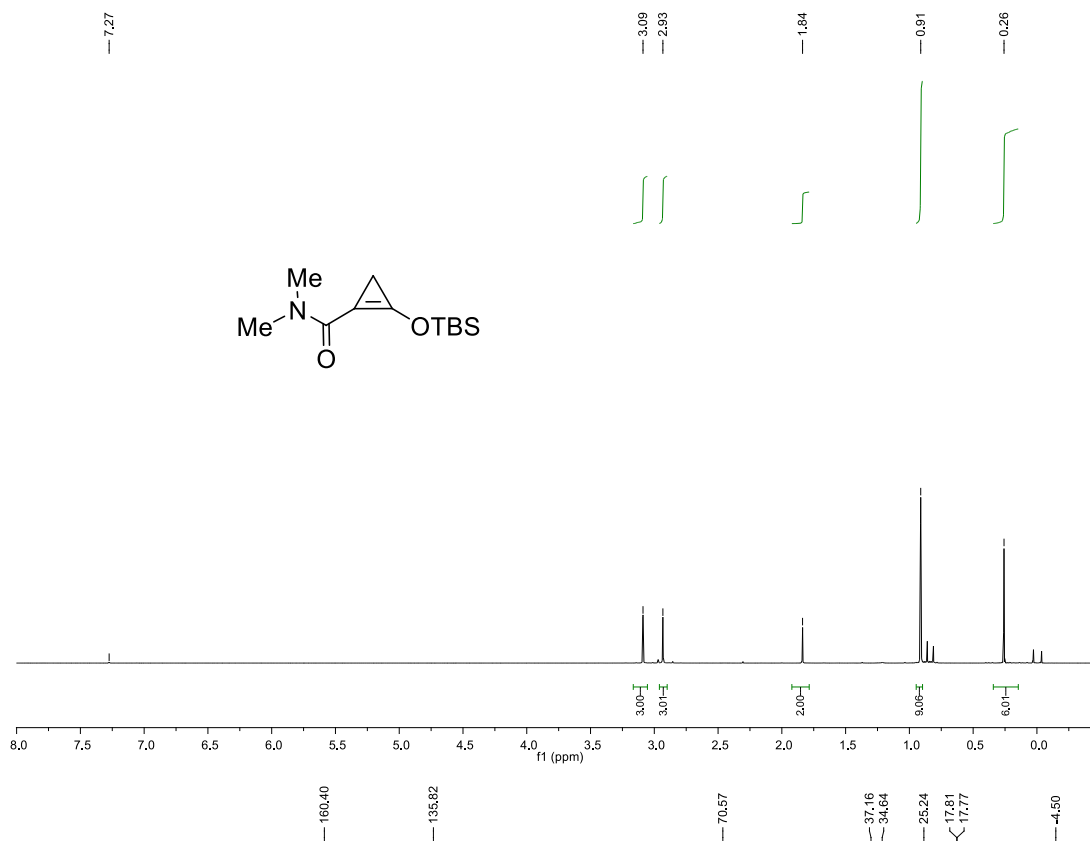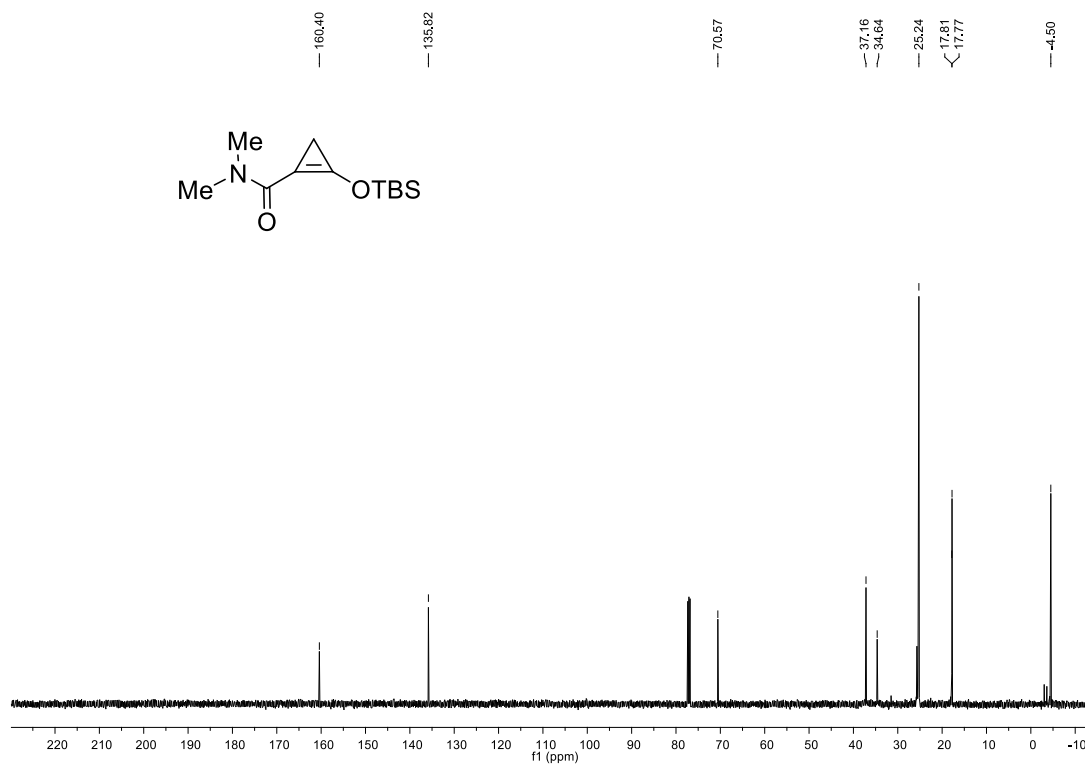

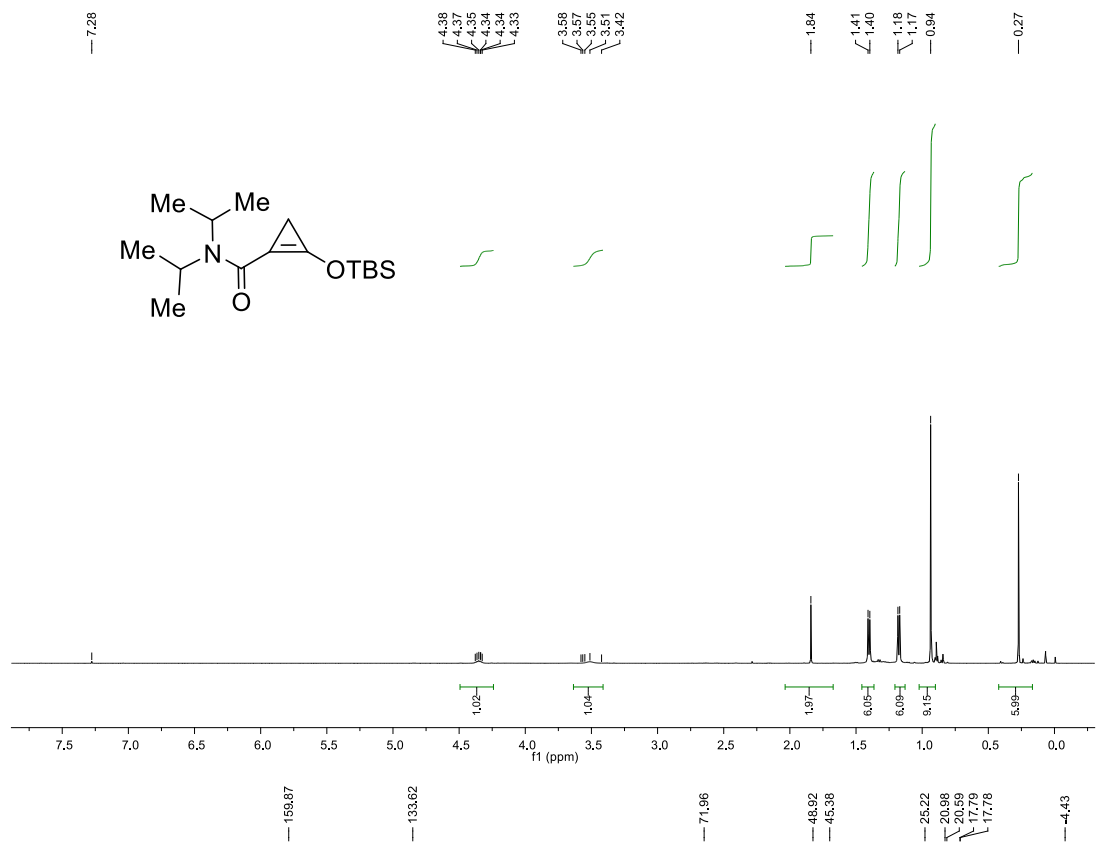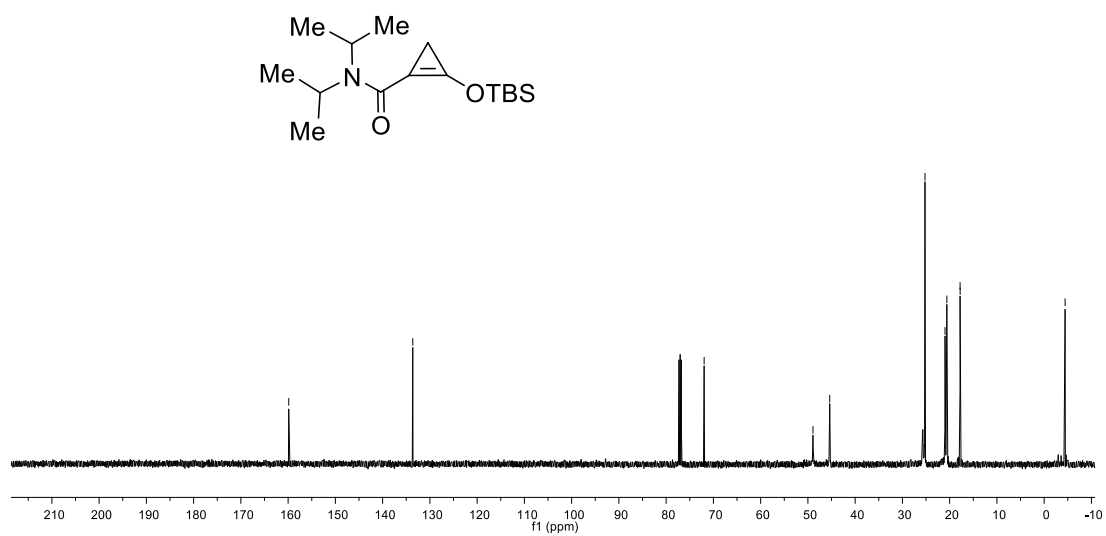

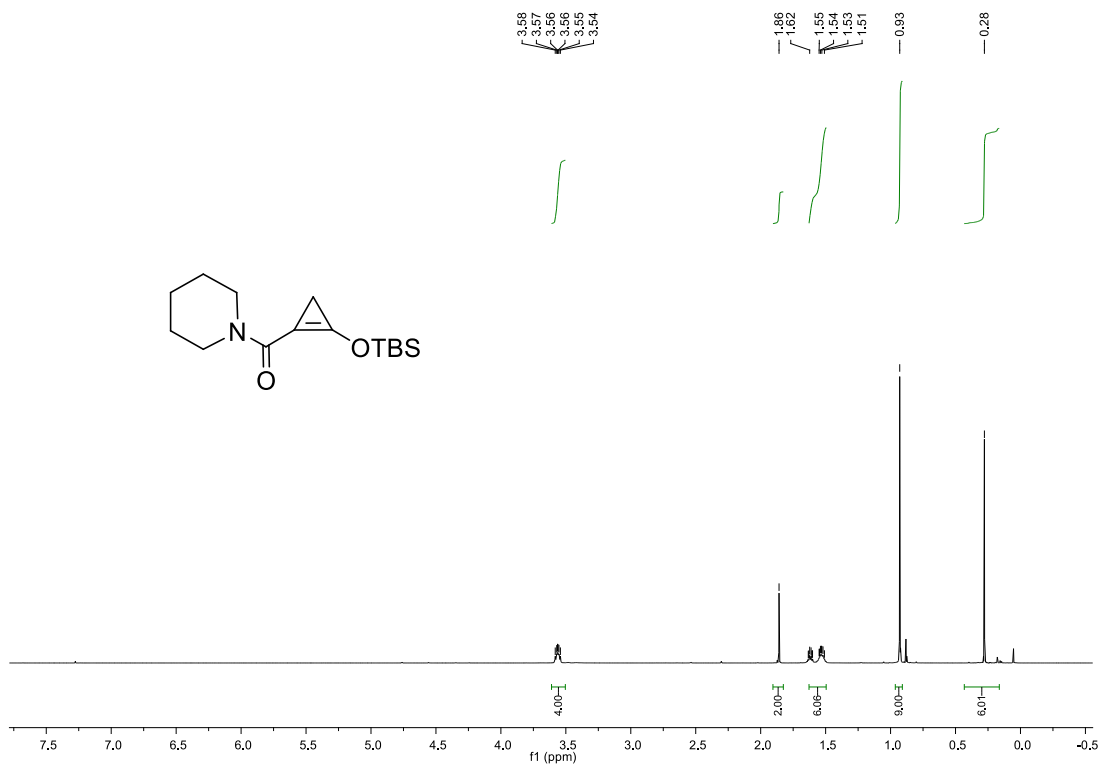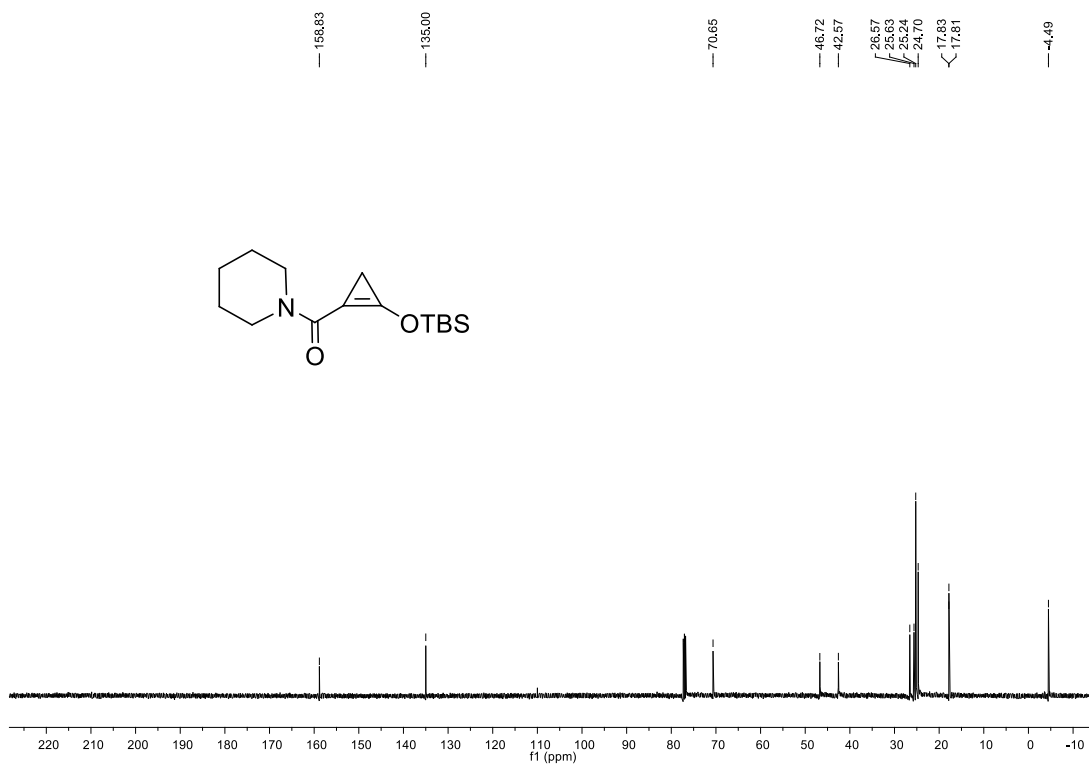

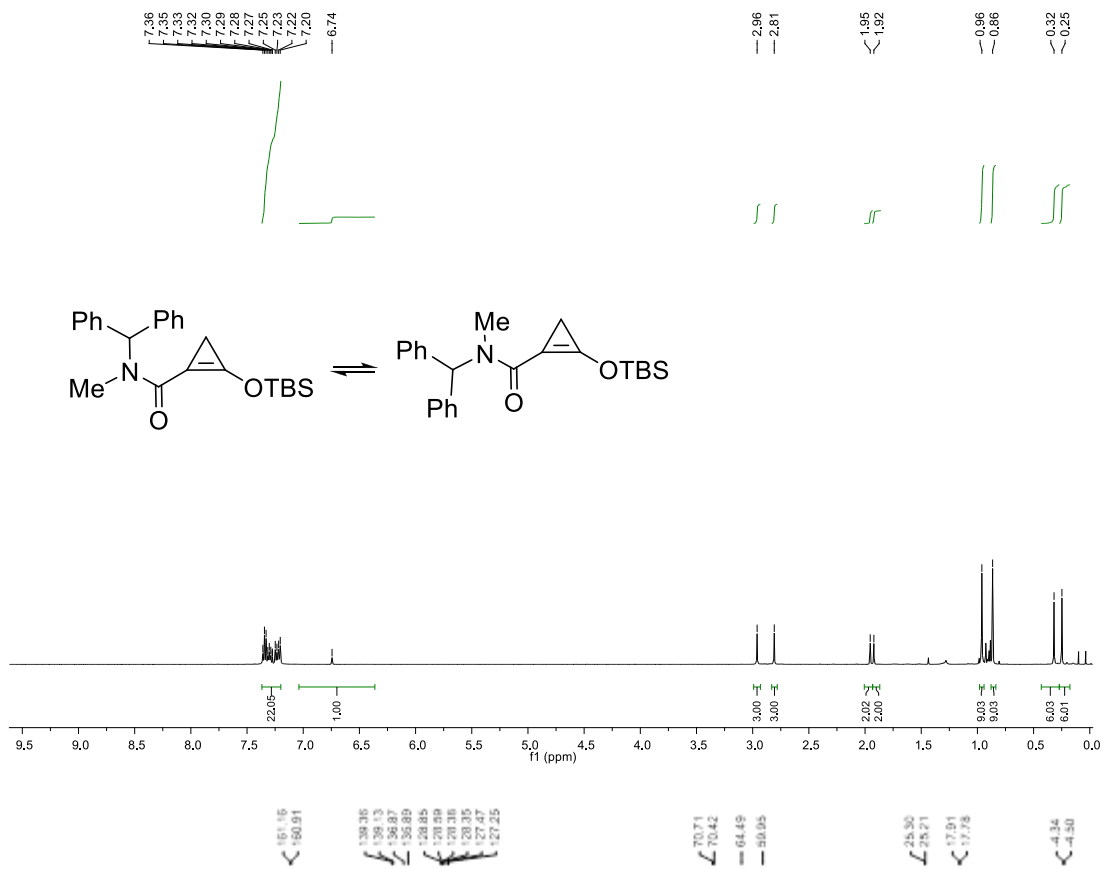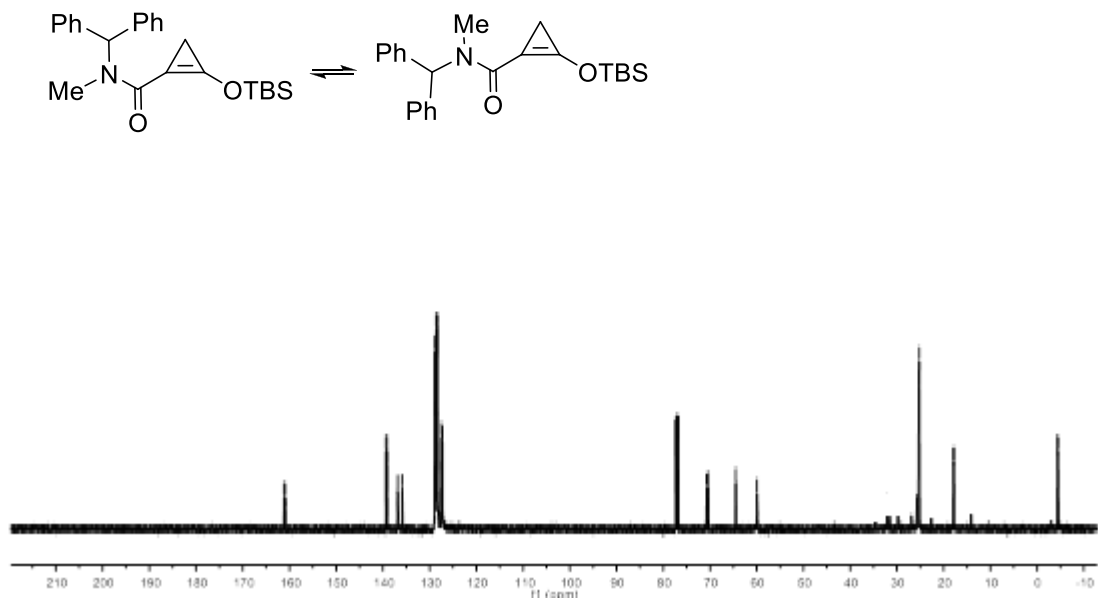



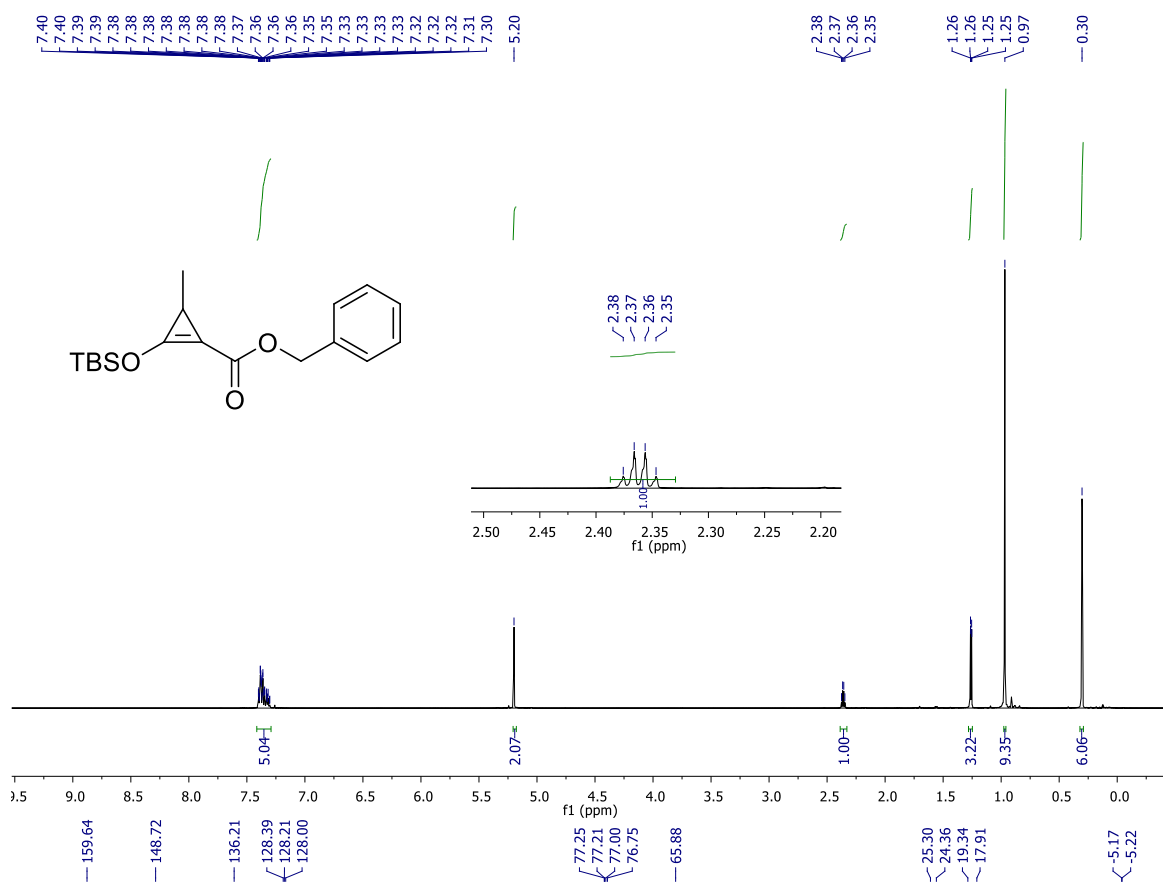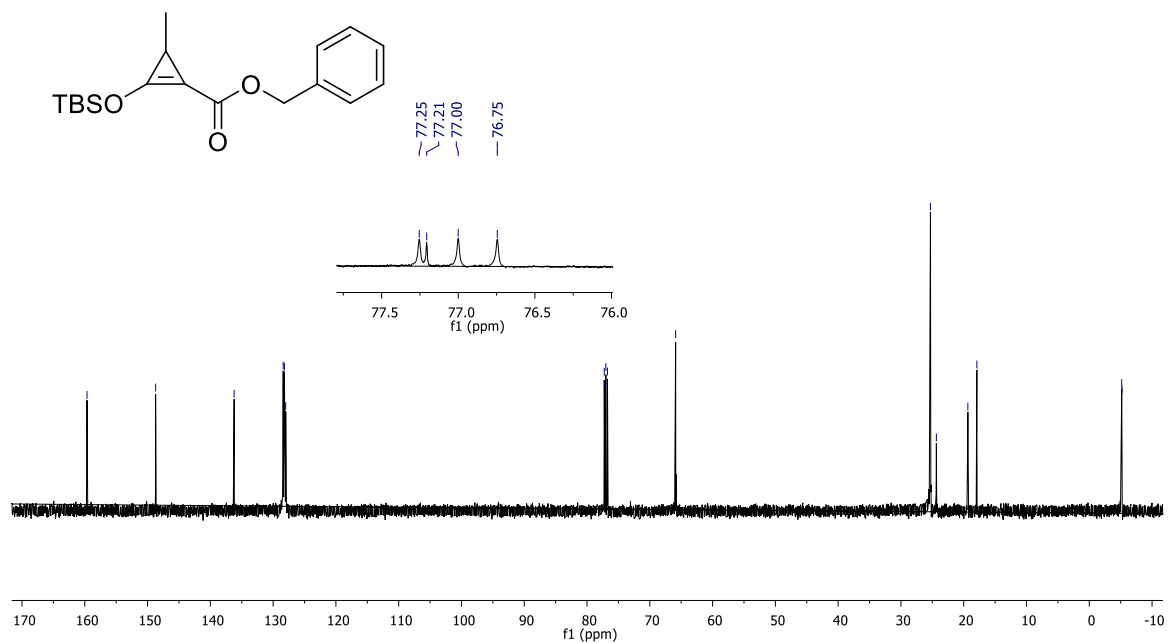



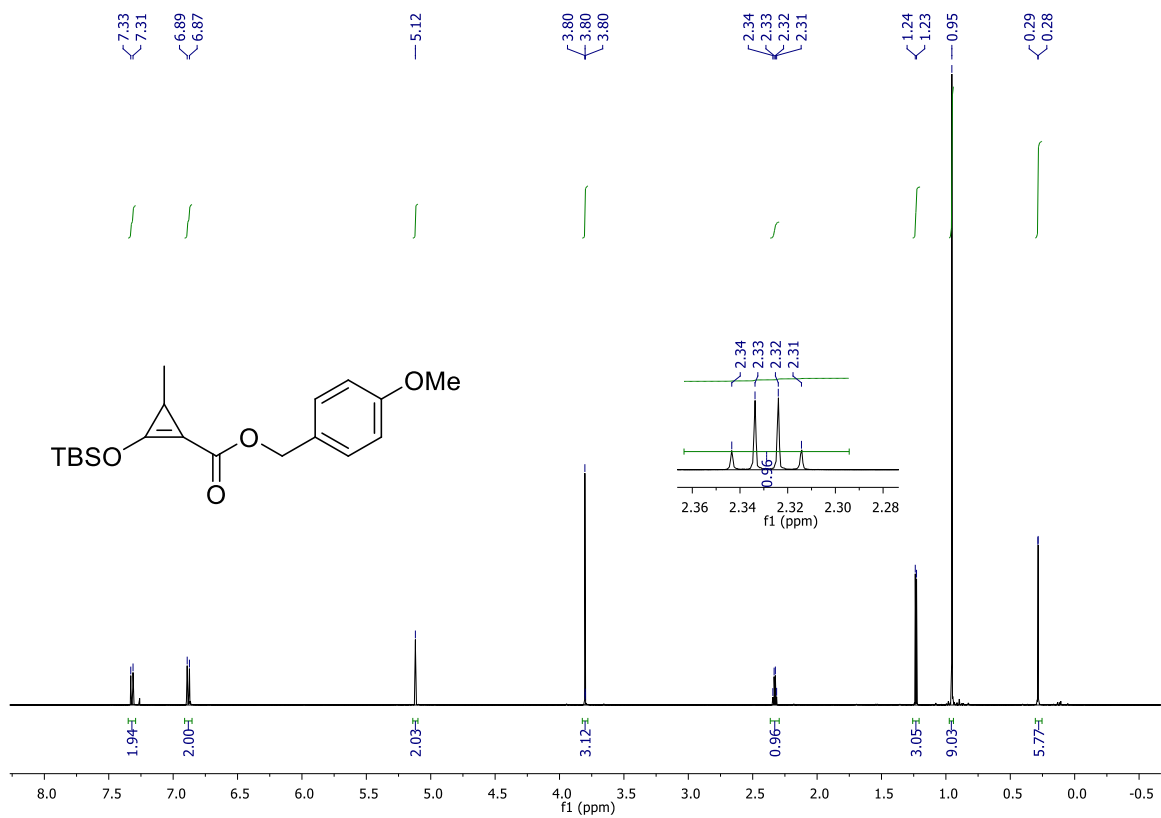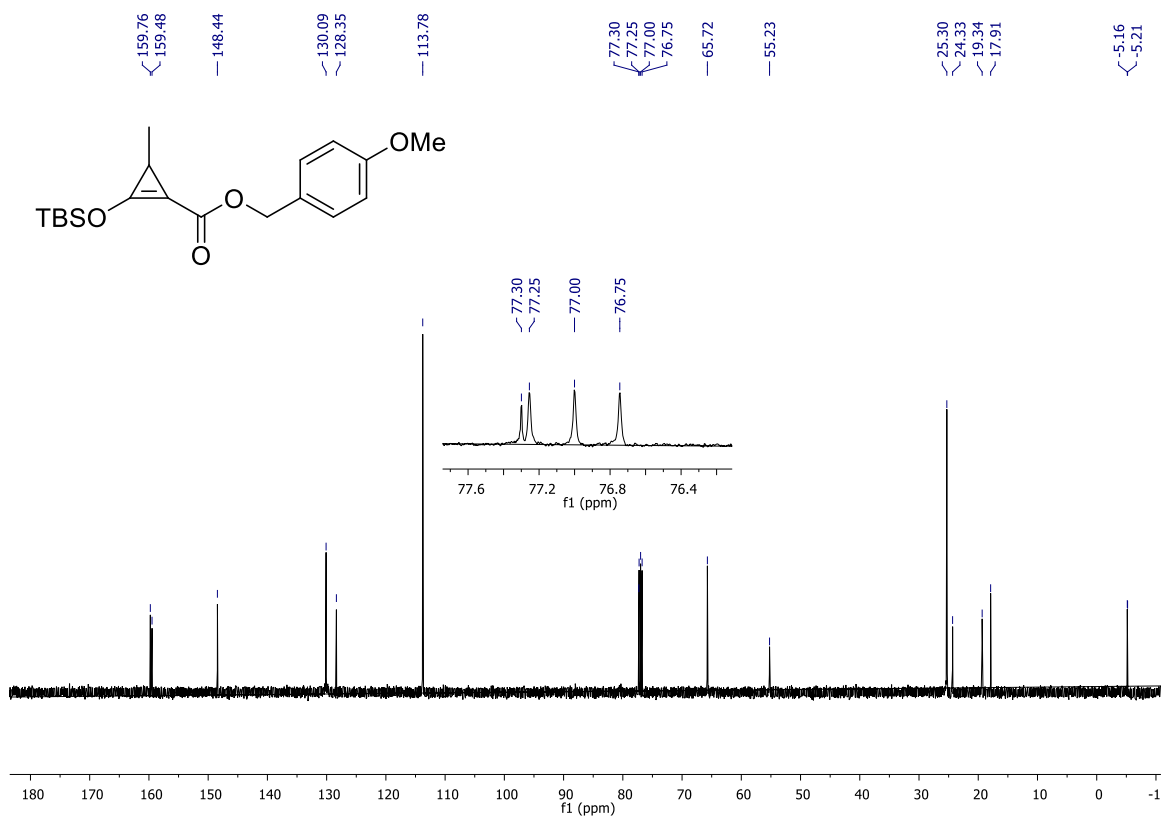

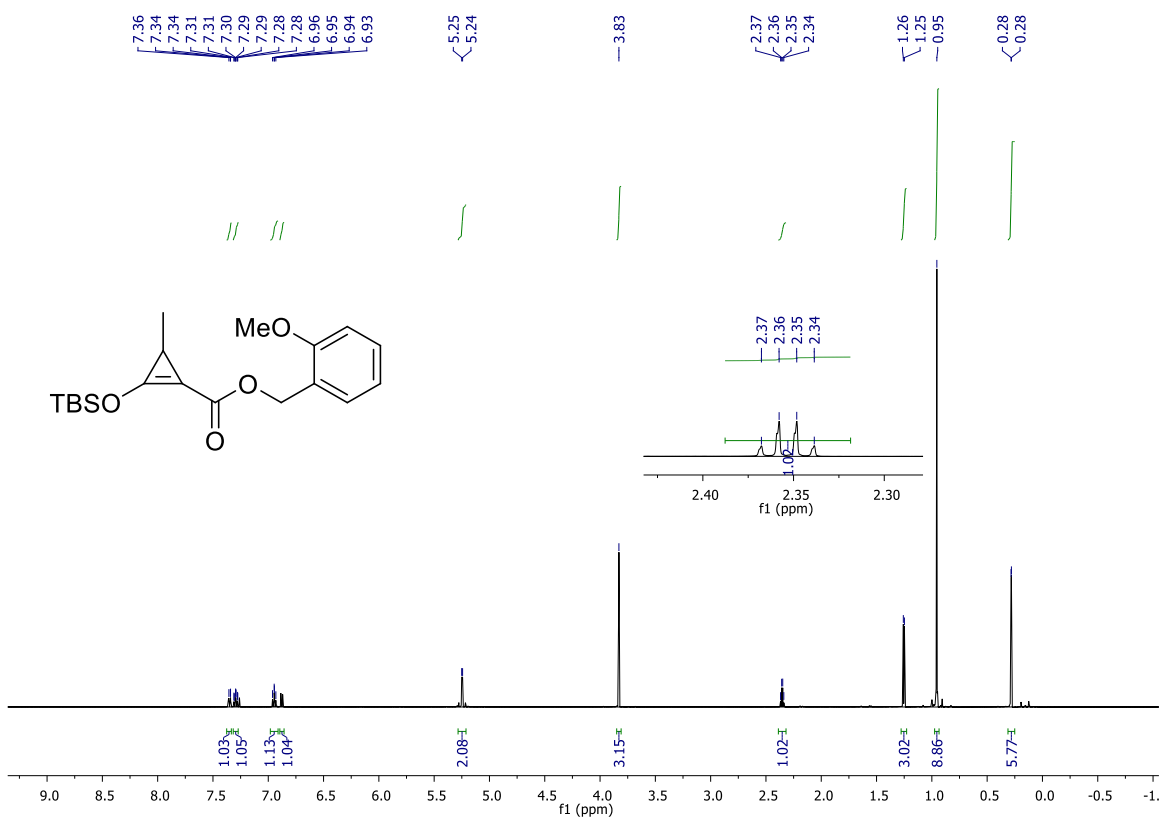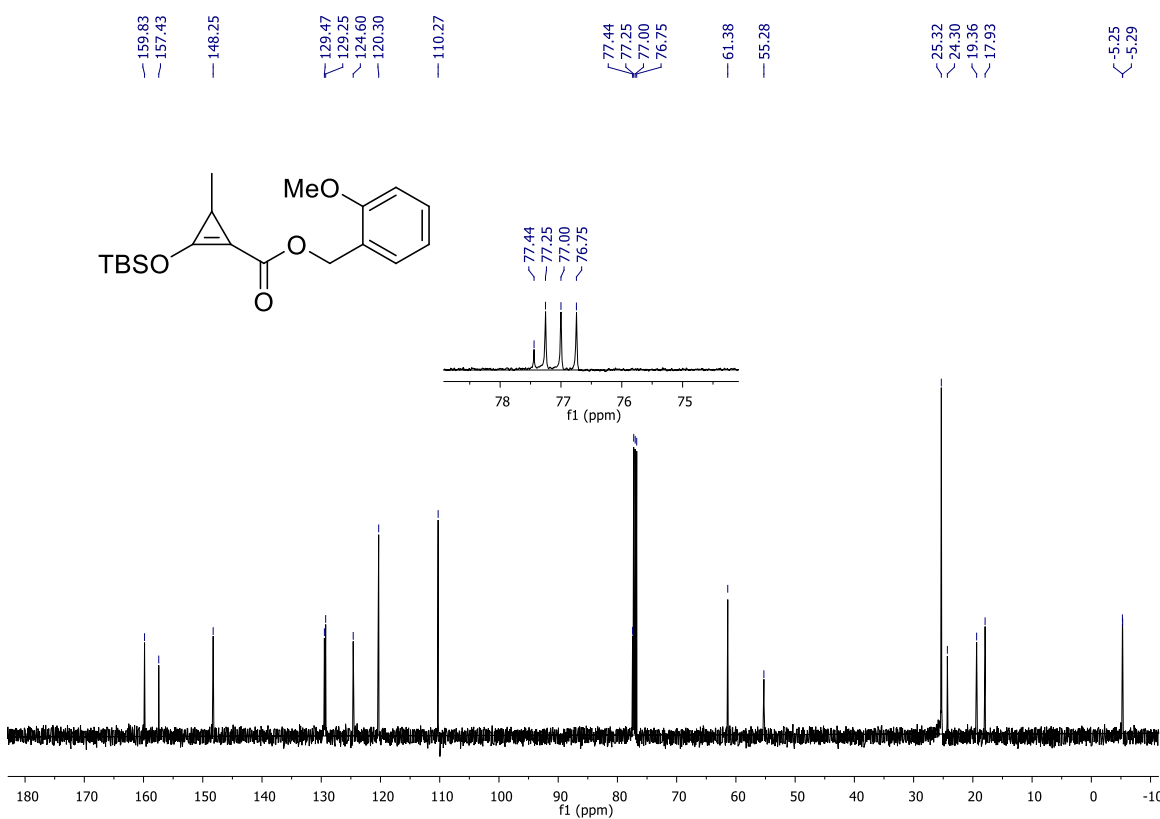

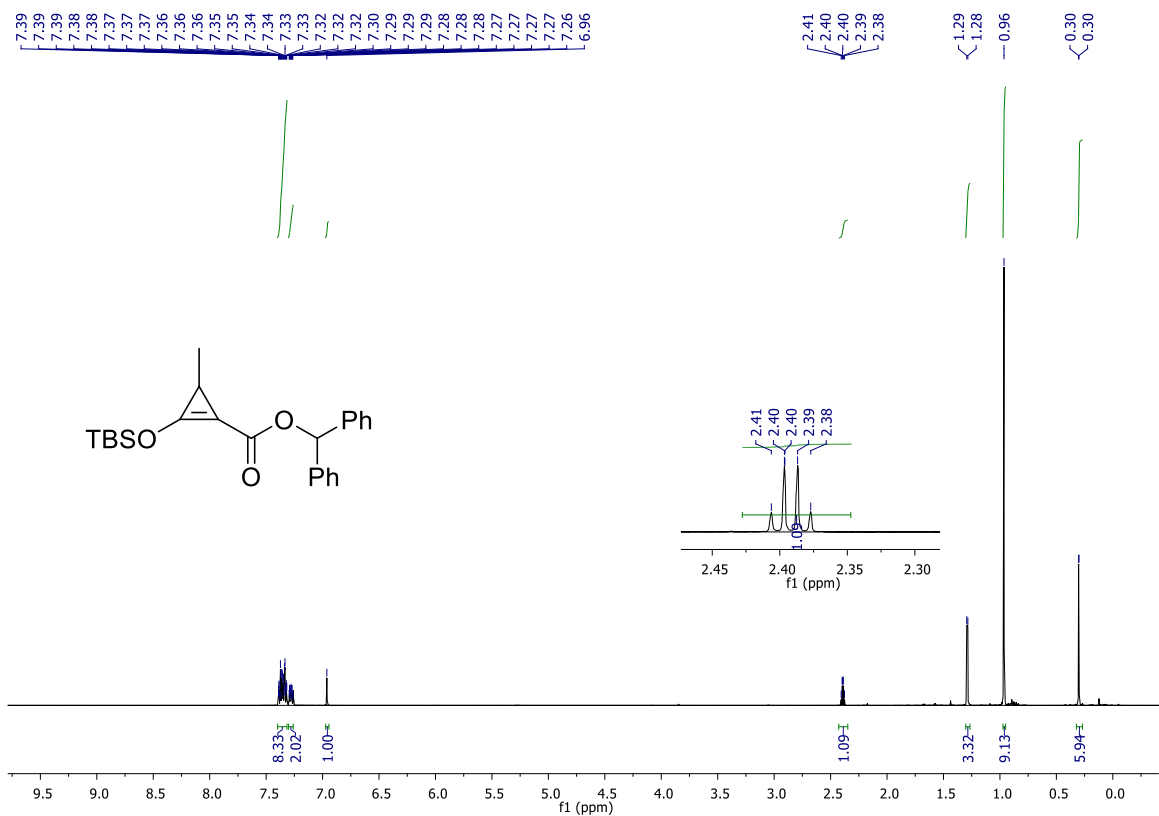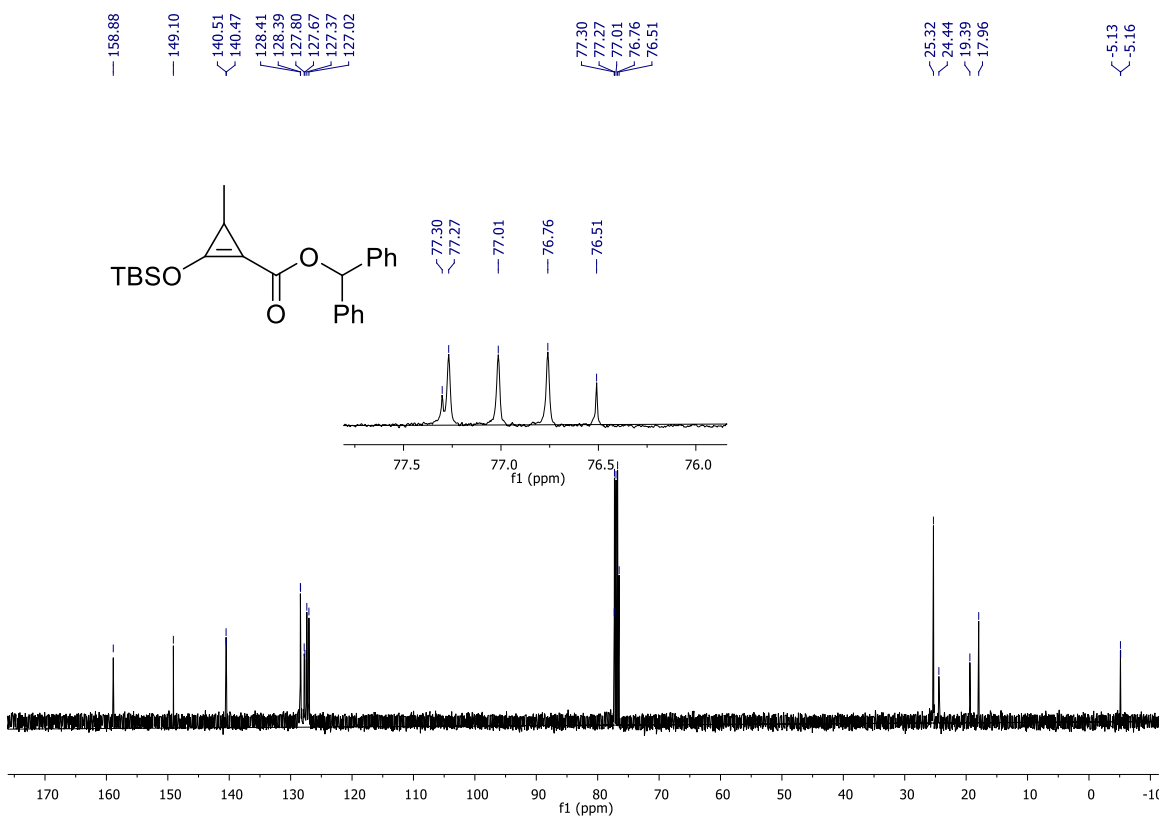

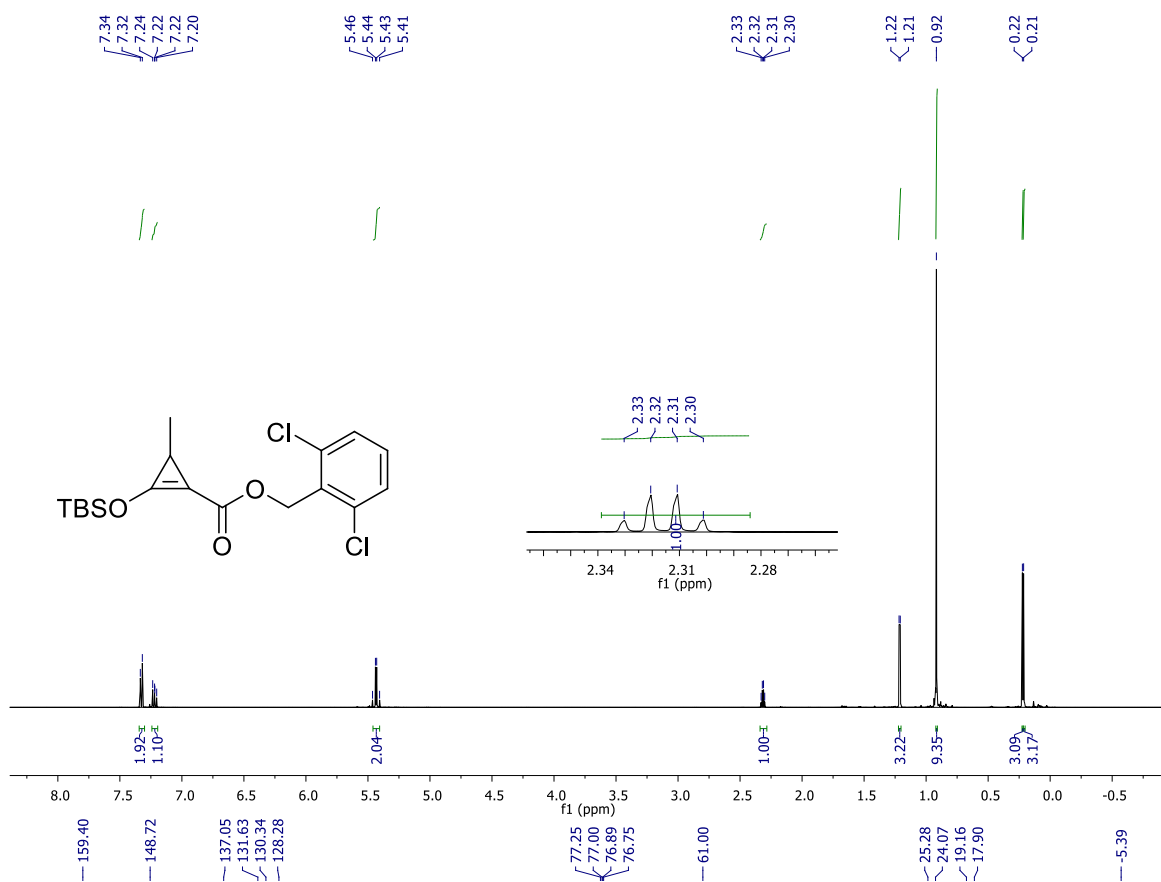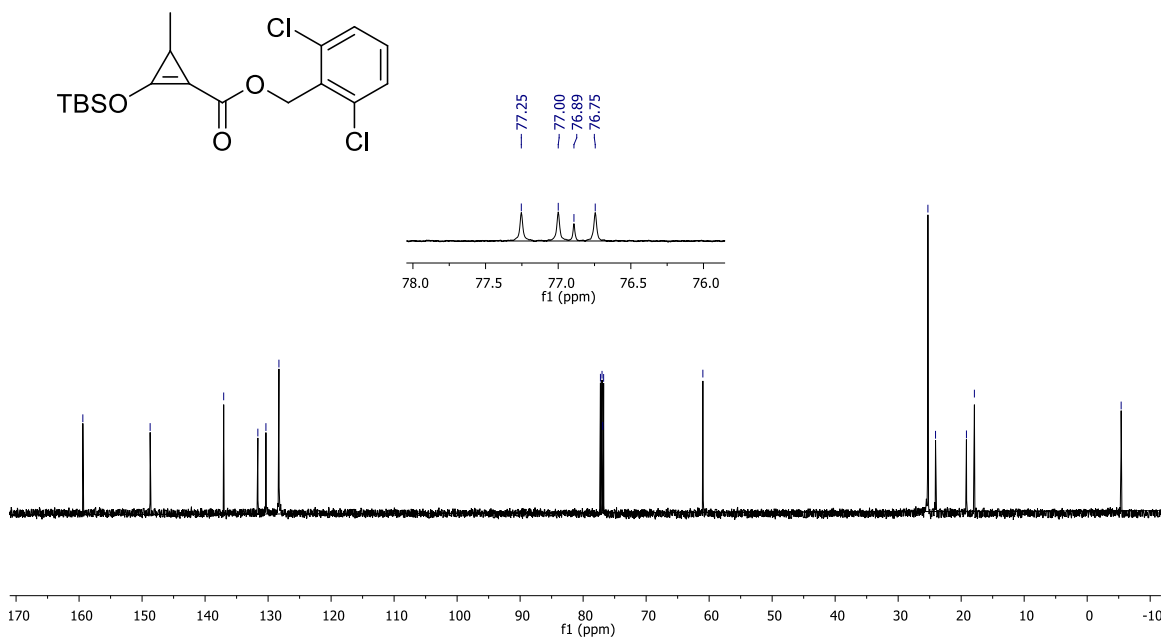

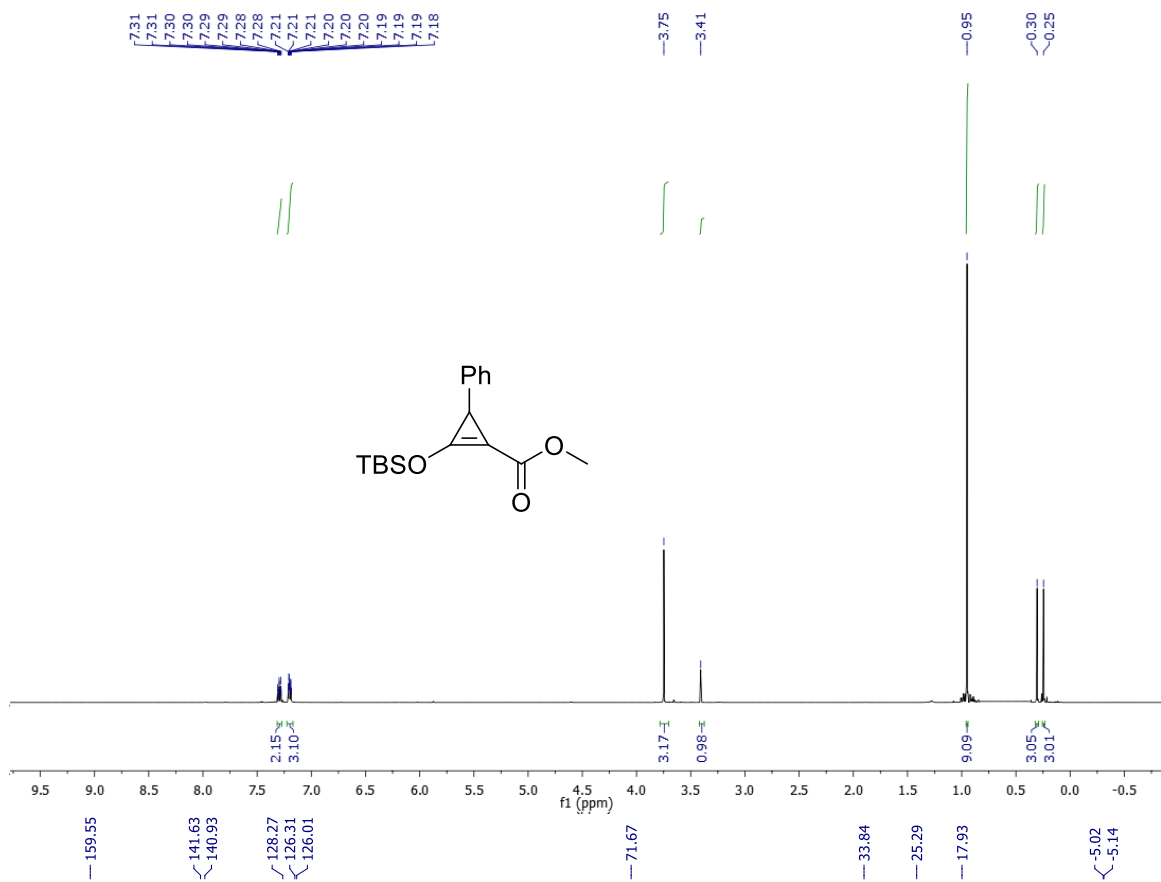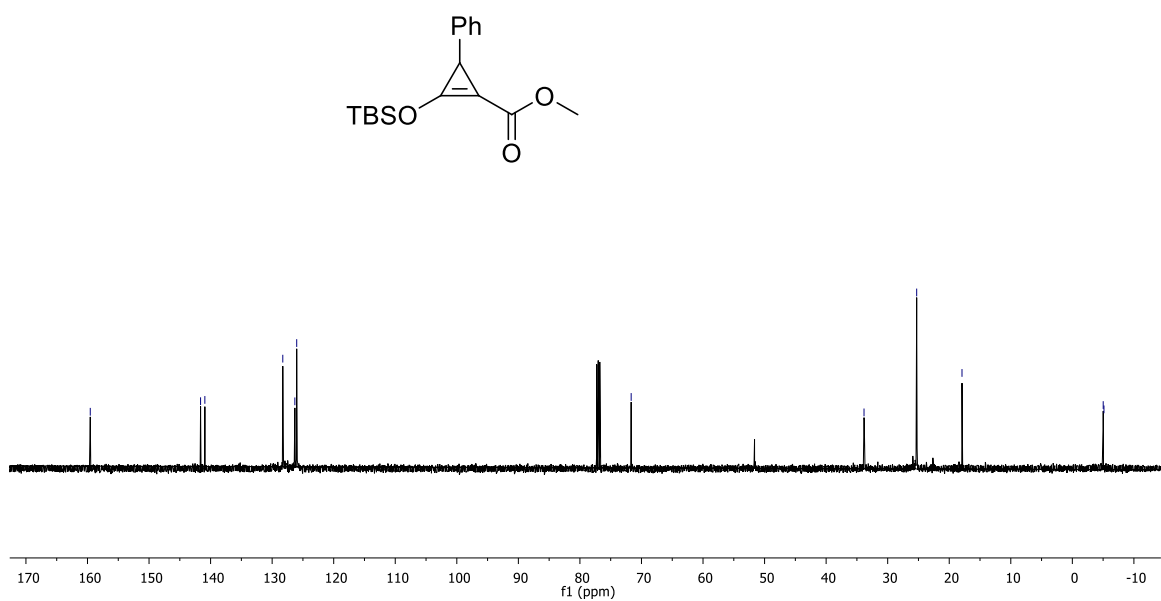

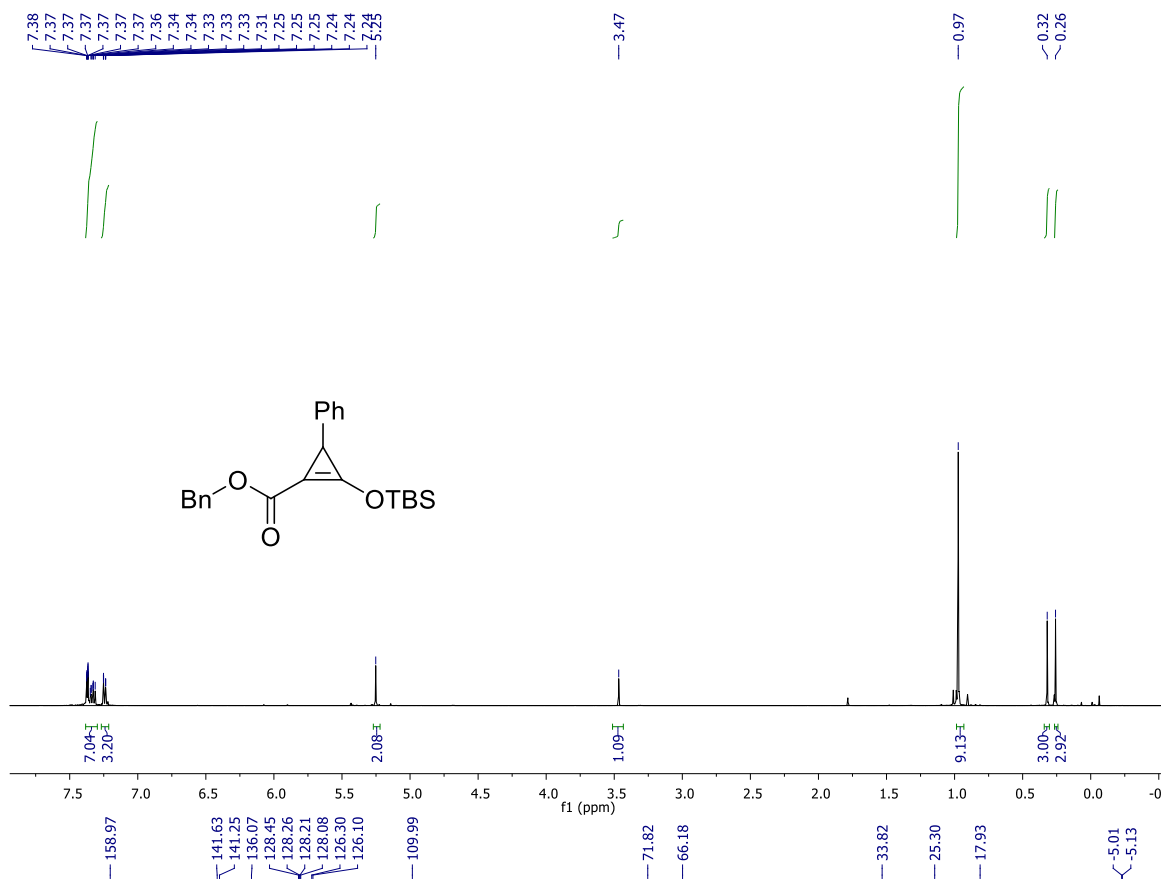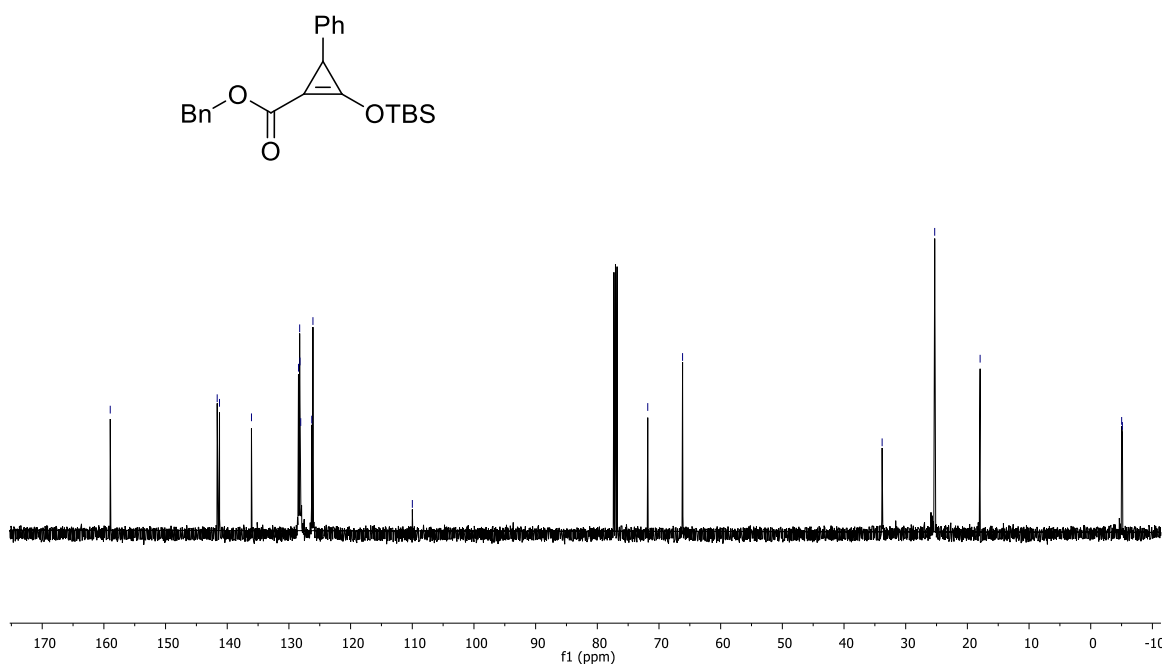

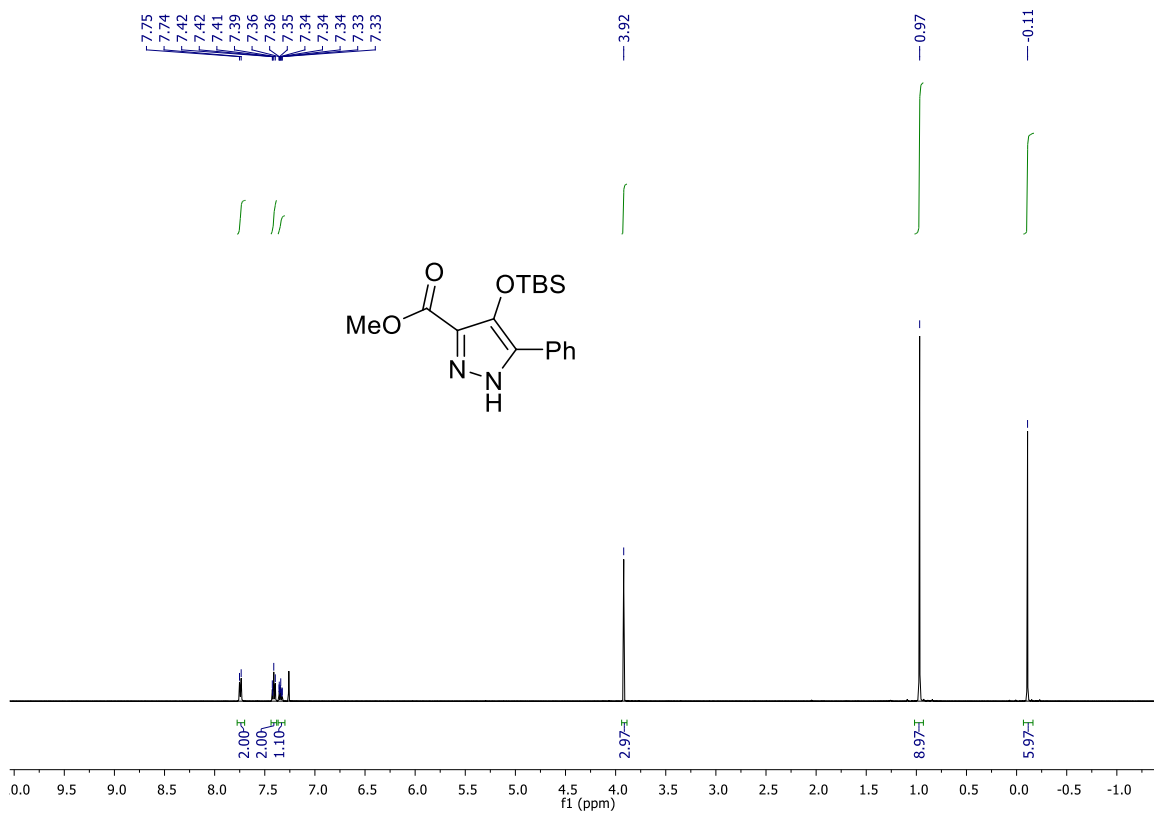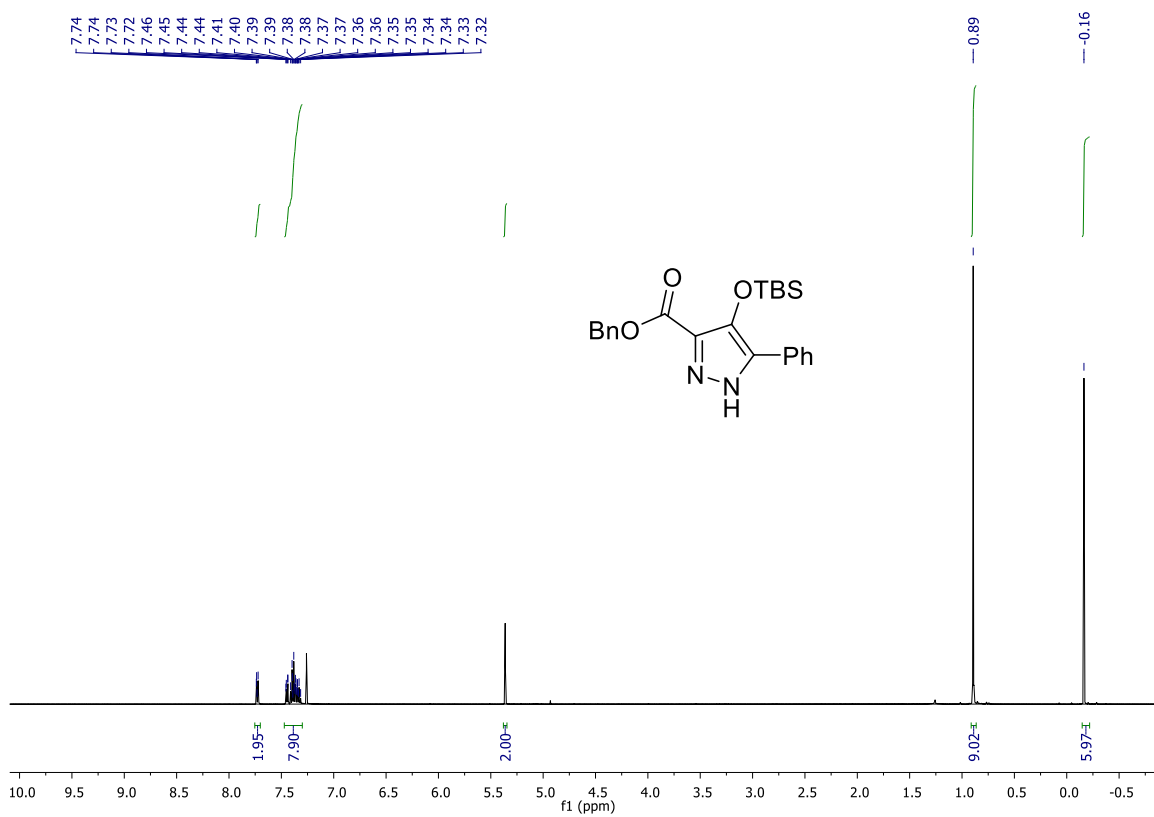

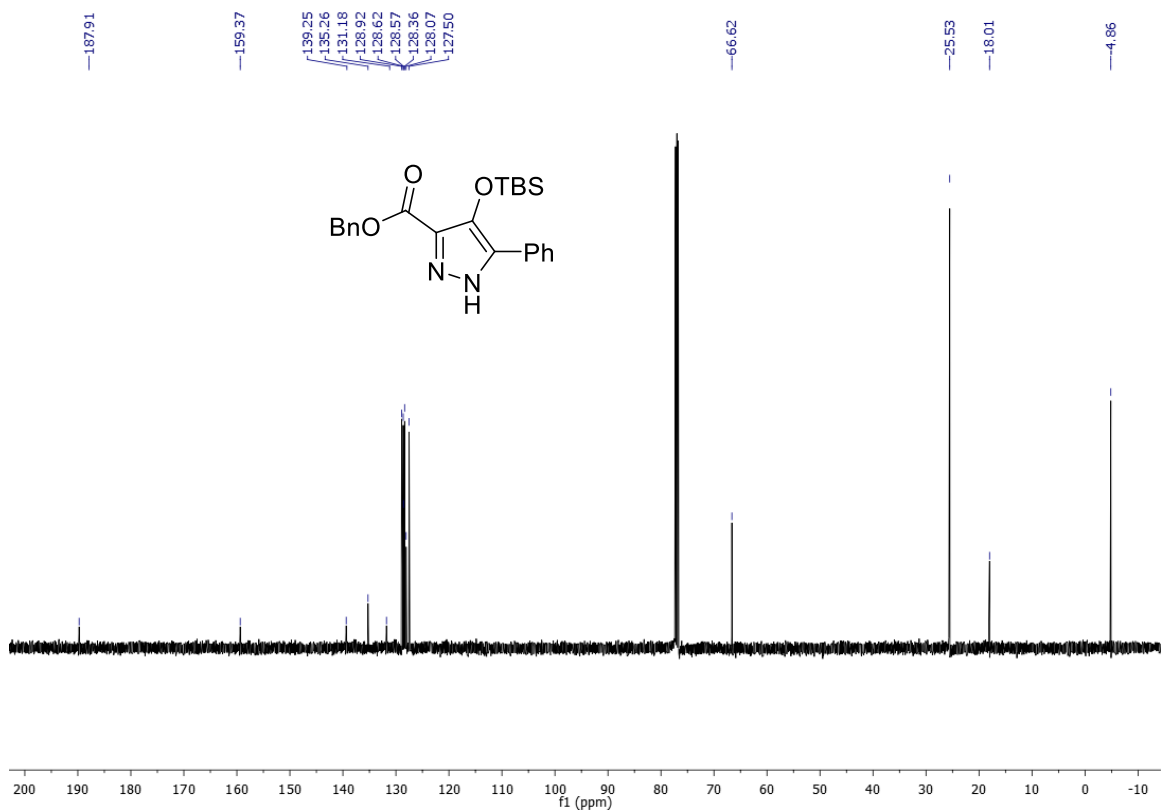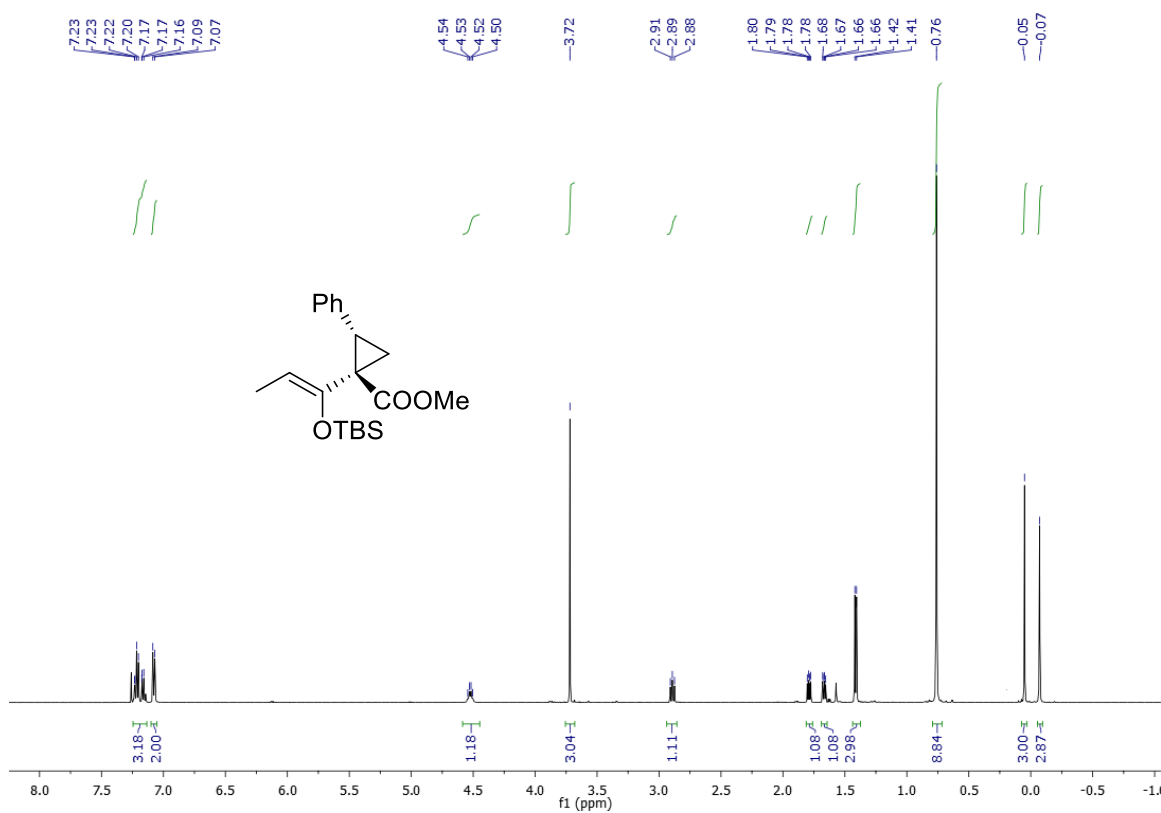



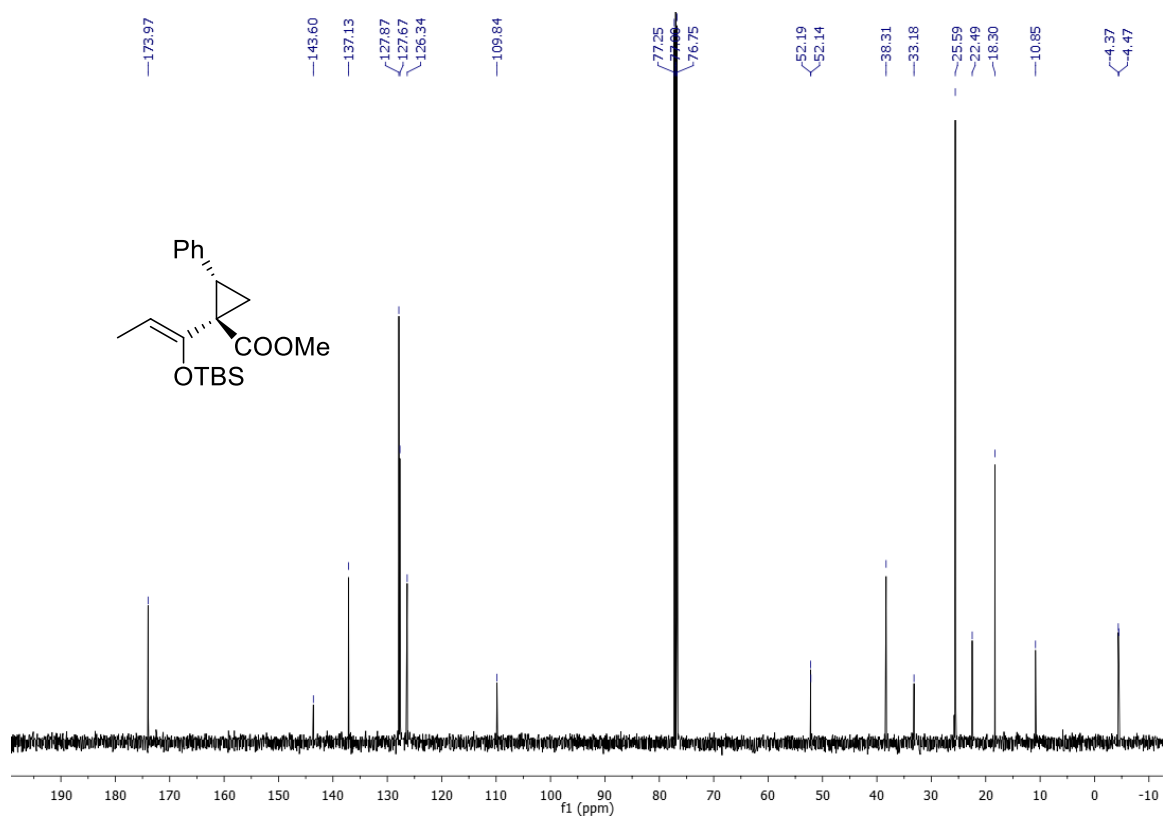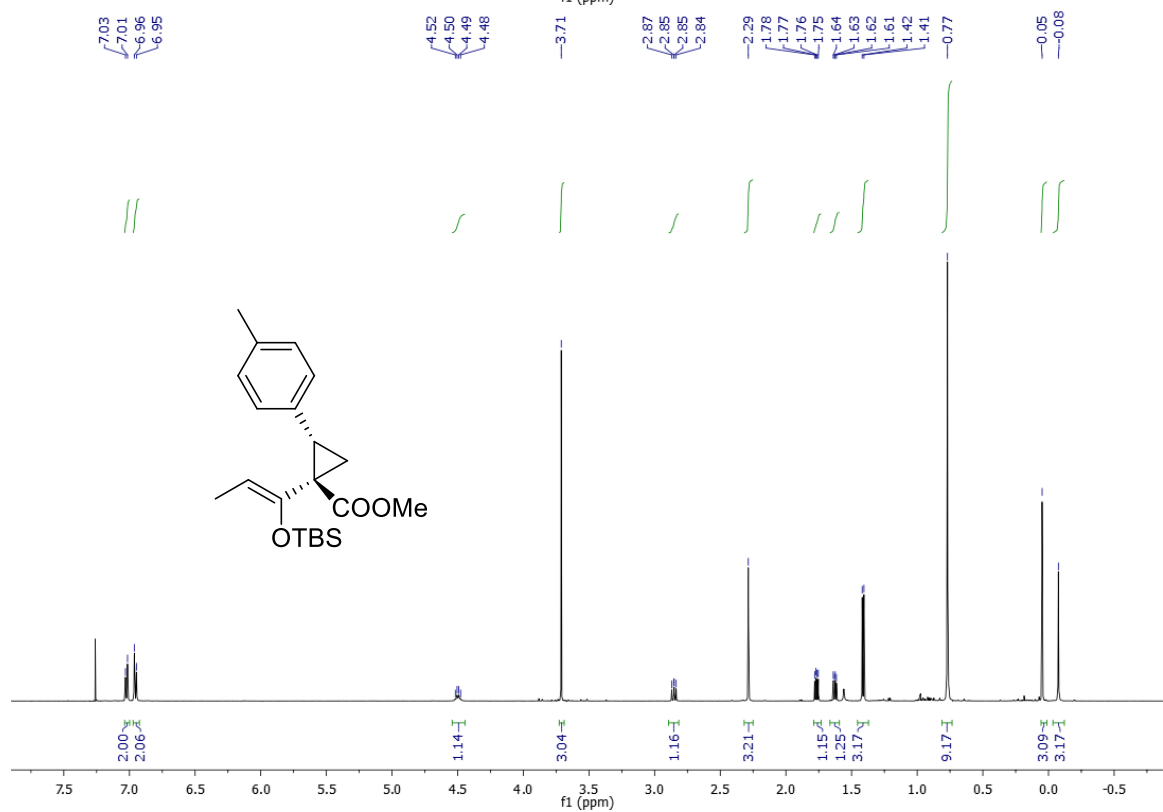

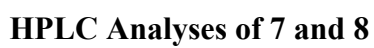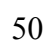

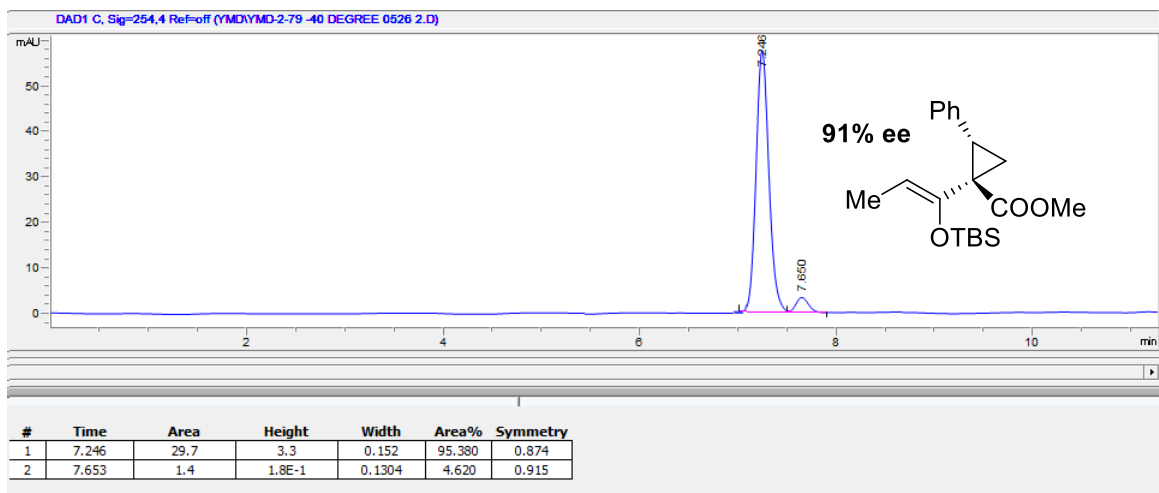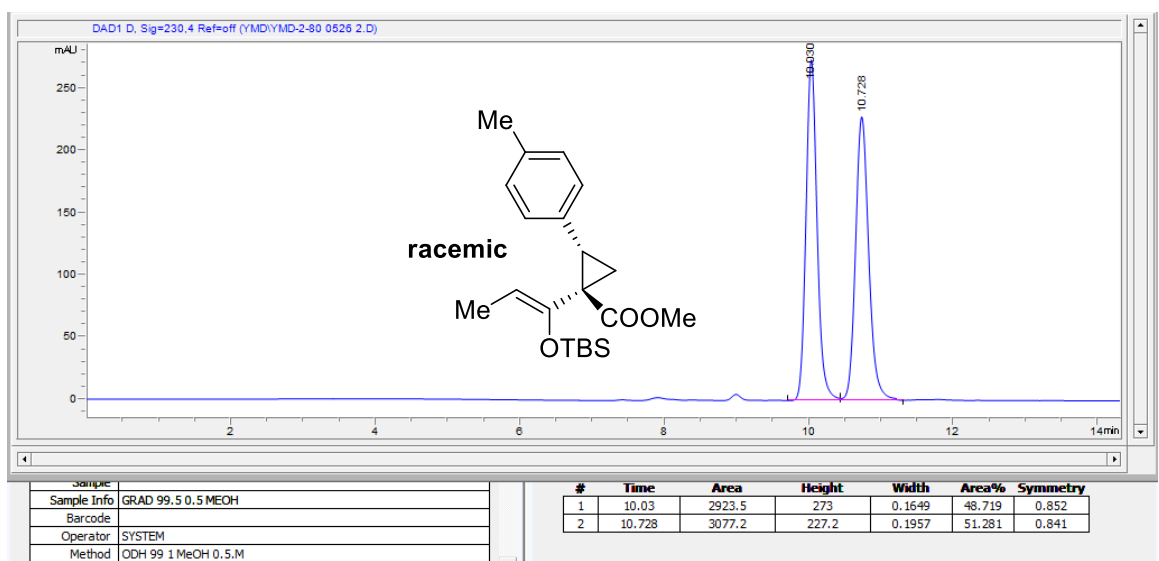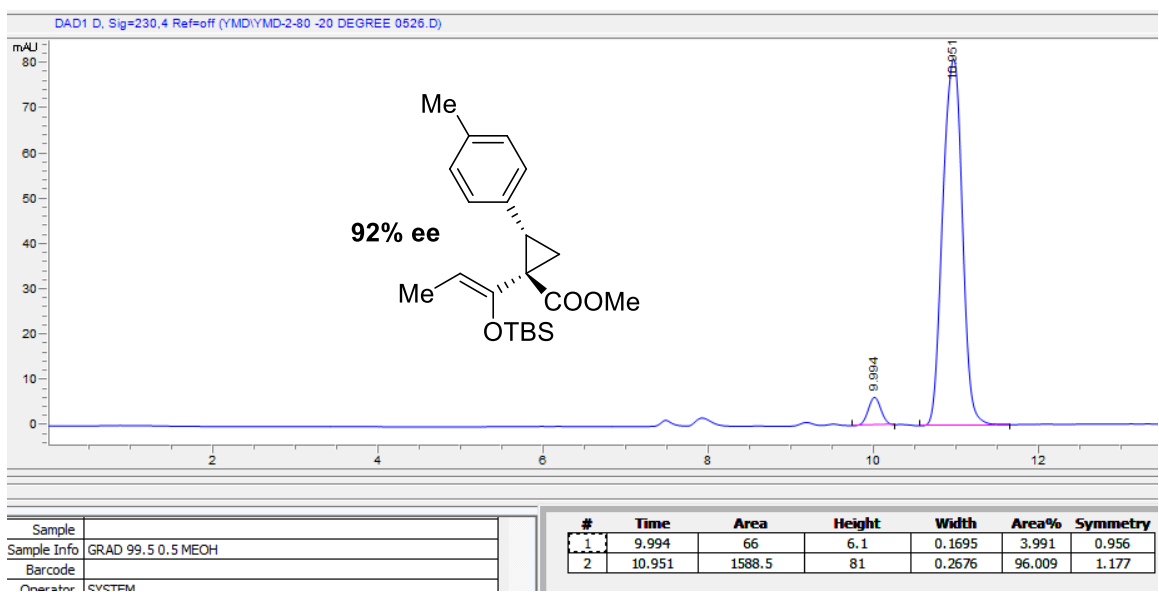

Supplement: c5cc05006e1.pdf [file c5cc05006e1.pdf]
